# Supplementary material for: Protein biomarker discovery for canine cognitive dysfunction syndrome based on molecular alterations observed in nasal fluids
Source: Research Square preprint supplement (doi:10.21203/rs.3.rs-7142040/v1), 2025-08-07
Supplement: Supplementary file 1 [file 8fd6df9a914f9039c4f8586b.xlsx]

## Sheet: Nasal
Protein information								Normalized protein abundance						Abundance average		Fold Change
Gene	Accession	Description	Coverage [%]	# Peptides	# PSMs	# Unique Peptides	# Peptides	Nasal_C71	Nasal_C72	Nasal_C74	Nasal_E21	Nasal_E25	Nasal_E56	Control	Disease	Disease/control	P-value	DEP
ALB	P49822	Albumin	86	67	866	16	67	7128.9	17257.2	15006	11483.1	22752.5	35966.9	13130.7	23400.8	1.78215	0.283344	-
HBB	P60524	Hemoglobin subunit beta	92	17	331	5	17	856.9	1053.16	1130.1	1761.78	1152.2	31202.2	1013.39	11372.1	11.2219	0.405871	-
HBA	P60529	Hemoglobin subunit alpha	72	9	222	3	9	557.2	594.673	589.585	1020	734.594	14312	580.486	5355.52	9.22593	0.398037	-
LOC477072	A0A8I3Q3K3	Serotransferrin	72	68	258	65	68	2764.2	4148.02	4738.57	5181.16	5729.69	9380.46	3883.59	6763.77	1.74163	0.147627	-
APOA1	A0A8I3MSG4	Apolipoprotein A1	79	33	157	33	33	1343.4	2726.11	1785.61	1630.66	2970.84	8951.97	1951.71	4517.82	2.31481	0.37233	-
MYH9	Q258K2	Myosin-9	67	164	423	2	164	6698.1	7815.58	4047.57	7186.06	6196.28	6349.41	6187.09	6577.25	1.06306	0.764637	-
ACTB	O18840	Actin, cytoplasmic 1	74	29	568	4	29	6427.1	5819.39	5657.42	6389.75	6386.81	5946.52	5967.97	6241.03	1.04575	0.389245	-
LOC479912	A0A8I3RSA3	glutathione transferase	63	29	406	25	29	7973	10230.3	8422.78	7878.2	6207.99	5386.12	8875.36	6490.77	0.731325	0.0771594	-
DYNC1H1	A0A8I3RSP2	Dynein cytoplasmic 1 heavy chain 1	53	240	436	240	240	5343.2	6254.49	5801.61	5683.08	5315.61	4939.69	5799.77	5312.79	0.916036	0.227517	-
C3	A0A8I3NQA0	Complement C3	63	106	237	106	106	1598.2	2395.6	2692.39	3064.74	3478.91	4702.76	2228.73	3748.81	1.68204	0.0708296	-
HSP90AA1	A0A8I3MR78	Heat shock protein 90 alpha family class A member 1	67	62	243	39	62	4162.8	3474.03	3374.45	2829.78	3031.1	4278.89	3670.43	3379.93	0.920854	0.612002	-
AHNAK	A0A8I3NCQ4	AHNAK nucleoprotein	69	229	371	229	229	4329	4482.48	3090.98	4519.23	5517.57	4274.81	3967.49	4770.53	1.20241	0.241071	-
LOC479668	A0A8I3N2C8	Dihydroorotate dehydrogenase (quinone), mitochondrial	37	26	109	26	26	721.3	2173.3	1600.28	3687	2087.91	4126.92	1498.3	3300.61	2.20291	0.0826334	-
HP	P19006	Haptoglobin	79	26	109	26	26	721.3	2173.3	1600.28	3687	2087.91	4126.92	1498.3	3300.61	2.20291	0.0826334	-
ALDH1A1	A0A8I3M9Q4	Aldehyde dehydrogenase 1 family member A1	67	38	451	33	38	9724.5	10400.8	10575	6667.81	5840.2	4089.72	10233.4	5532.58	0.540637	0.0168887	Down
HSPA8	A0A8I3NK47	Heat shock protein family A (Hsp70) member 8	71	50	253	33	50	4560.3	5200.86	5001.4	4534.58	4715.23	3878.51	4920.85	4376.11	0.889298	0.166615	-
LOC479911	A0A8I3MJB3	Glutathione S-transferase	89	27	354	26	27	5560.8	6774.12	5137.04	5991.68	5354	3815.19	5823.98	5053.62	0.867726	0.399627	-
ACTG1	A0A8I3NE73	Actin gamma 1	72	19	410	3	19	3985	3959.85	3589.22	4324.11	4856.93	3744.61	3844.69	4308.55	1.12065	0.284165	-
EZR	A0A8I3MKE1	Ezrin	68	51	168	38	51	3071	3361.86	2641.43	2932.32	3304.76	3713.61	3024.76	3316.9	1.09658	0.396482	-
-	O18873	Major allergen Can f 1	82	18	646	18	18	5132.1	12011.3	9894.35	12325.9	7381.37	3652.92	9012.59	7786.73	0.863984	0.72456	-
OBP2B	A0A8I3NBT3	Odorant binding protein 2B	82	18	646	18	18	5132.1	12011.3	9894.35	12325.9	7381.37	3652.92	9012.59	7786.73	0.863984	0.72456	-
MYH14	A0A8I3P4Q1	Myosin heavy chain 14	64	138	393	120	138	3114.1	4932.43	4919.37	5575.8	5240.25	3646.99	4321.97	4821.01	1.11547	0.587734	-
ENO1	A0A8I3PVT9	phosphopyruvate hydratase	71	34	301	14	34	5601.9	5860.46	6113.64	4320.84	4983.24	3646.46	5858.67	4316.85	0.736831	0.0433901	-
S100A9	A0A8I3MFK0	Protein S100	52	15	154	15	15	1566.5	1052.84	1179.92	6084.58	4226.07	3363.49	1266.42	4558.05	3.59915	0.0501186	-
TUBB4B	A0A8I3PJ87	Tubulin beta chain	82	27	168	1	27	2494.6	1364.87	1646.71	1538.9	1680.75	3316.65	1835.39	2178.77	1.18708	0.638038	-
LOC119873859	A0A8I3RVG1	Heat shock cognate 71 kDa protein	53	37	191	26	37	3503.2	4070.13	3717.8	3556.7	3525.2	3213.49	3763.71	3431.8	0.911813	0.180152	-
YWHAE	A0A8I3NMG3	Uncharacterized protein	80	30	180	27	30	3099.9	3609.27	3056.88	3392.77	3415.4	3144.5	3255.35	3317.56	1.01911	0.774029	-
S100A8	A0A8I3MKE4	S100 calcium binding protein A8	49	22	182	11	22	3145	2837.33	2477.87	5199.77	3707.97	3084.21	2820.07	3997.32	1.41746	0.194541	-
LTF	A0A8I3NMR3	Lactotransferrin	80	59	456	58	59	2653.7	8076.27	13550.8	8487.55	7562.16	2994.76	8093.57	6348.16	0.784345	0.658071	-
PLEC	A0A8I3N0D3	Plectin	51	198	366	33	198	3894	3305.3	3330.66	4186.79	4534.3	2918.12	3509.99	3879.74	1.10534	0.540809	-
TUBA1C	A0A8I3PAA3	Tubulin alpha chain	71	24	124	3	24	2177.2	724.856	987.674	825.7	1147.97	2828.28	1296.58	1600.65	1.23452	0.713202	-
SPTAN1	A0A8I3S6F7	Spectrin alpha, non-erythrocytic 1	68	164	254	164	164	3225	3230.41	2626.96	3728.14	2643.69	2793.58	3027.46	3055.14	1.00914	0.948095	-
ANXA1	A0A8I3M9P4	Annexin	81	31	178	31	31	4841	1542.14	1922	3337.91	2387.11	2773.66	2768.38	2832.89	1.0233	0.957121	-
GAPDH	A0A8I3Q5N9	Glyceraldehyde-3-phosphate dehydrogenase	84	24	224	1	24	2767.1	1631.24	2039.26	1762.1	1731.41	2764.82	2145.87	2086.11	0.972154	0.905957	-
LOC474938	A0A8I3N374	glutathione transferase	79	21	316	20	21	4946.6	5626.64	5597.03	3919.18	3713.05	2546.49	5390.09	3392.91	0.629472	0.0253782	Down
CAPS	P10463	Calcyphosin	54	11	29	11	11	190.4	213.918	174.258	304.025	155.528	2481.32	192.859	980.292	5.08295	0.404804	-
LGALS7B	A0A8I3MS75	Actinin alpha 4	72	67	256	1	67	2592	3293.61	2897.72	3478	3846.14	2467.34	2927.78	3263.83	1.11478	0.518893	-
CLTC	A0A8I3PQE6	Clathrin heavy chain	59	88	262	67	88	3085.7	3108.6	2739.06	2830.6	2556.33	2441.48	2977.79	2609.47	0.876312	0.0910565	-
IDH1	F1PZA1	Isocitrate dehydrogenase [NADP]	85	34	177	33	34	3123.2	3498.2	2952.2	2322.8	1885.11	2335.02	3191.2	2180.98	0.683434	0.0100843	-
AOX2	A0A8I3PZF5	aldehyde oxidase	68	78	273	77	78	4723.4	5157.25	4511.09	3411.87	2096.66	2330.67	4797.25	2613.07	0.544702	0.0186462	Down
VCP	A0A8I3N153	Transitional endoplasmic reticulum ATPase	81	60	170	60	60	2083.5	2160.03	2140.55	1735.98	1489.37	2326.97	2128.03	1850.77	0.869714	0.380613	-
BPIFB1	A0A8I3PU85	BPI fold containing family B member 1	34	13	35	13	13	117.7	296.23	248.617	192.016	253.474	2297.82	220.849	914.437	4.14055	0.421804	-
FASN	A0A8I3N2Z7	Fatty acid synthase	51	100	239	100	100	2518.8	2968.15	2954.34	3180.02	3249.43	2297.03	2813.76	2908.83	1.03378	0.798781	-
-	A0A8I3NT93	Ig-like domain-containing protein	48	18	141	14	18	1269.6	1473.09	1671.75	2282.31	2860.33	2283.97	1471.48	2475.54	1.68234	0.0171827	UP
PGK1	A0A8I3P9Y9	Phosphoglycerate kinase	89	37	148	37	37	2995.5	2635.74	2425.4	2434.16	2589.07	2156.93	2685.55	2393.39	0.89121	0.239522	-
TKT	A0A8I3Q4Y1	Transketolase	73	39	230	39	39	2448.2	3801.54	2692.64	2845.13	2735.85	2104.95	2980.79	2561.98	0.859495	0.441427	-
LOC611458	A0A8I3PX48	Pregnancy zone protein-like	28	39	47	39	39	166.9	386.126	310.771	295.045	386.562	2085.03	287.933	922.212	3.20287	0.38962	-
CES5A	A0A8I3MG03	Carboxylic ester hydrolase	61	31	202	31	31	3621.1	2313.12	4819.97	2571.64	2625.06	2065.37	3584.73	2420.69	0.675278	0.245566	-
EEF2	A0A8I3RV50	Eukaryotic translation elongation factor 2	68	55	173	54	55	2667.6	2677.76	2282.97	2240.84	3138.78	2064.85	2542.78	2481.49	0.975896	0.876185	-
CLU	A0A8I3NF26	Clusterin	42	23	72	23	23	754	1107.19	4522.04	1366.15	1740.73	2047.04	2127.74	1717.97	0.807416	0.767026	-
SELENBP1	A0A8I3PHV4	Methanethiol oxidase	90	35	190	35	35	2954.7	3088.22	2668.86	2953.71	1743.41	2033.98	2903.93	2243.7	0.772643	0.20496	-
CFL1	A0A8I3PA72	Cofilin 1	65	24	132	12	24	2765.6	3366.92	2039.64	2771.82	2742.91	2027.51	2724.05	2514.08	0.922919	0.672131	-
DSP	A0A8I3P212	Desmoplakin	62	201	315	201	201	4366.5	1996.51	5645.34	4773.78	9447.26	2010.1	4002.79	5410.38	1.35165	0.602607	-
-	A0A8I3PZH8	Heat shock protein 90 alpha family class A member 1	60	37	143	26	37	2501.8	1689.54	1626.83	1541.19	1356.42	1984.11	1939.39	1627.24	0.839047	0.415118	-
PPL	A0A8I3S2F8	Periplakin	71	144	249	143	144	3796.6	2887.42	3520.4	4290.64	5952.68	1967.75	3401.47	4070.36	1.19665	0.624788	-
MDH1	A0A8I3NYN6	Malate dehydrogenase 1	51	21	113	21	21	2552.8	2607.93	2255.8	2817.86	2273.64	1928.97	2472.18	2340.16	0.946598	0.673786	-
HSPA4	A0A8I3N9R4	Heat shock 70 kDa protein 4	71	55	114	52	55	1589.3	1982.14	1769.38	1789.53	1731.69	1918.41	1780.27	1813.21	1.0185	0.811588	-
LOC479821	A0A8I3N4L4	Uncharacterized protein	58	30	76	28	30	2096.8	533.847	1792.16	658.34	728.102	1899.28	1474.27	1095.24	0.742906	0.577965	-
GC	A0A8I3NFN0	Vitamin D-binding protein	61	32	63	32	32	584.9	1051.74	886.138	775.574	1394.67	1886.09	840.925	1352.11	1.60789	0.24892	-
CAND1	A0A8I3NT24	Cullin associated and neddylation dissociated 1	54	61	113	56	61	1866.8	1758.27	1672.63	1471.96	1350.92	1863.27	1765.9	1562.05	0.884563	0.318215	-
FGA	A0A8I3RXA2	Fibrinogen alpha chain	38	25	40	25	25	323.1	651.707	395.321	1002.2	391.219	1851.4	456.709	1081.61	2.36826	0.275557	-
LOC481674	A0A8I3N4Y9	Uncharacterized protein	62	14	374	14	14	3482.2	10201.4	9671.65	5982.21	3924.19	1847.7	7785.08	3918.03	0.503274	0.211267	-
IQGAP1	A0A8I3MM93	IQ motif containing GTPase activating protein 1	70	79	181	76	79	2360.7	2834.96	1829.9	2358.23	2160.17	1835.83	2341.86	2118.08	0.904445	0.543467	-
TALDO1	H9GW87	Transaldolase	59	26	82	26	26	1686	2029.53	1682.19	1597.19	1423.32	1830.68	1799.24	1617.07	0.898748	0.33124	-
LOC477540	A0A8I3S4E0	Galactose-3-O-sulfotransferase 1	66	29	344	28	29	3596.5	2824.38	2899.11	2781.29	2635.93	1819.34	3106.66	2412.19	0.776456	0.150197	-
P4HB	A0A8I3NBI7	Protein disulfide-isomerase	75	39	96	39	39	2186.7	1359.34	2261.21	1648.63	1808.33	1808.65	1935.75	1755.2	0.90673	0.59804	-
CALM1	E2REK6	Calmodulin 2	66	13	88	13	13	965.6	1177.5	683.571	1130.22	1208.94	1785.3	942.222	1374.82	1.45912	0.16894	-
CALM3	A0A8I3MV80	Uncharacterized protein	50	13	88	13	13	965.6	1177.5	683.571	1130.22	1208.94	1785.3	942.222	1374.82	1.45912	0.16894	-
NQO1	A0A8I3NAN7	NAD(P)H quinone dehydrogenase 1	68	18	213	18	18	2340.9	4656.27	3679.43	3461.18	3316.19	1752.19	3558.87	2843.19	0.798902	0.456699	-
MTHFD1	A0A8I3MJJ7	C-1-tetrahydrofolate synthase, cytoplasmic	61	50	123	49	50	2283.7	2106.47	1961.88	1799.33	1741.15	1699.55	2117.35	1746.68	0.824935	0.047252	-
PRDX1	A0A8I3S380	Peroxiredoxin-1	73	20	182	16	20	2617.7	3280.81	2494.1	2623.4	2924.83	1676.86	2797.54	2408.36	0.860887	0.441818	-
FLNB	A0A8I3S4M6	Filamin B	48	94	114	85	94	1255.5	1221.42	829.268	1070.29	891.392	1676.47	1102.06	1212.72	1.10041	0.711955	-
UBA1	A0A8I3Q2T9	E1 ubiquitin-activating enzyme	61	52	142	52	52	1838.3	2154.19	2216.79	1992.82	2046.84	1671.72	2069.76	1903.79	0.919813	0.372985	-
RRBP1	A0A8I3PD78	Ribosome binding protein 1	60	79	107	79	79	1590.2	1079.86	770.889	1380.2	1092.65	1658.79	1146.98	1377.21	1.20072	0.476332	-
LOC607806	A0A8I3RUB3	Uncharacterized protein	74	14	89	13	14	2365.1	688.044	2531.84	1301.49	1894.56	1640.85	1861.66	1612.3	0.866055	0.718579	-
PLS3	A0A8I3P7I9	Plastin 3	67	43	128	33	43	1965.7	2515.04	2249.25	2733.94	3233.63	1614.2	2243.33	2527.25	1.12656	0.621079	-
MVP	A0A8I3MGN1	Major vault protein	59	43	94	43	43	391.5	2403.49	1624.82	1450.4	1251.28	1613.01	1473.27	1438.23	0.976217	0.958109	-
STIP1	A0A8I3QZ05	Uncharacterized protein	69	55	100	55	55	1688.8	1784.02	1645.58	1626.75	1714.05	1609.19	1706.13	1650	0.967097	0.345554	-
SULT1C3	A0A8I3MZG9	Sulfotransferase	82	23	123	23	23	1266.5	1991.62	1212.01	2544.21	1978.25	1520.14	1490.04	2014.2	1.35177	0.250245	-
LRBA	A0A8I3RXY0	LPS responsive beige-like anchor protein	34	79	108	73	79	1379.7	1572	1004.53	1393.26	851.169	1518.69	1318.74	1254.37	0.951187	0.819855	-
CCT5	A0A8I3PEA3	T-complex protein 1 subunit epsilon	73	43	89	42	43	1773.3	1496.48	1650.36	1350.64	1202.17	1510.11	1640.05	1354.31	0.825774	0.0760388	-
SOD1	A0A8I3S396	Superoxide dismutase [Cu-Zn]	32	13	122	13	13	2091.8	1782.44	1753.28	1413.5	1464.81	1496	1875.84	1458.1	0.777308	0.0550757	-
APBB1	A0A8I3RVQ3	Amyloid beta precursor protein binding family B member 1	29	13	35	13	13	382.2	548.54	533.721	603.152	819.838	1476.47	488.154	966.487	1.97988	0.206462	-
SPTBN1	A0A8I3NBT5	Spectrin beta chain	47	97	125	84	97	1423.1	1401.68	1135.01	1532.04	1045.93	1470.01	1319.93	1349.33	1.02227	0.878882	-
CAP1	A0A8I3NG14	Adenylyl cyclase-associated protein	75	32	123	32	32	1710	2309.81	1722.2	2219.12	2237.94	1463.02	1914	1973.36	1.03101	0.863658	-
TLN1	A0A8I3N6K0	Talin 1	55	104	142	93	104	1609.2	2070.45	1662.31	1649.77	1748.07	1461.3	1780.65	1619.71	0.909616	0.405337	-
EPRS1	A0A8I3SBI9	Glutamyl-prolyl-tRNA synthetase 1	52	70	99	69	70	1400.7	1417.8	977.608	1145.56	1110.29	1458	1265.37	1237.95	0.978333	0.887694	-
ALDOA	A0A8I3MJP4	Fructose-bisphosphate aldolase	67	31	169	17	31	1737.1	1951.33	1811.53	1928.81	2316.41	1454.57	1833.32	1899.93	1.03633	0.817286	-
LOC610304	A0A8I3NBF2	Glutathione S-transferase	59	14	139	10	14	2760.8	2981.26	3118.53	2322.64	2016.92	1447.85	2953.53	1929.14	0.653162	0.0422679	Down
VCL	A0A8I3NB49	Vinculin	64	69	135	69	69	1756.8	1994.93	1867.9	1952.65	2246.4	1441.65	1873.21	1880.23	1.00375	0.979393	-
LOC100683724	A0A8I3NPU2	Glyceraldehyde-3-phosphate dehydrogenase	61	16	165	1	16	1665.7	1019.82	1354.06	1214.3	1246.48	1426.08	1346.53	1295.62	0.962195	0.816634	-
CA2	A0A8I3P3N6	Carbonic anhydrase	57	13	21	13	13	140	132.395	124.812	179.77	222.707	1424.23	132.402	608.903	4.59888	0.3631	-
TPI1	P54714	Triosephosphate isomerase	91	21	126	21	21	1667.2	2010.1	1792.28	1775	1836.41	1417.11	1823.19	1676.18	0.919362	0.425699	-
EIF4A1	A0A8I3PVR6	ATP-dependent RNA helicase	56	25	76	12	25	1350.8	1235.32	1202.82	1278.47	1172.81	1399.83	1262.98	1283.7	1.01641	0.80878	-
PDIA3	A0A8I3S5M8	Protein disulfide-isomerase	66	39	96	39	39	1554.1	901.014	1637.4	1193.08	1390.15	1394.42	1364.17	1325.88	0.971933	0.887045	-
SCGB2A2	A0A8I3N381	Mammaglobin-A-like	47	4	288	4	4	4784.2	10687.7	3109.73	6896.89	4557.87	1390.59	6193.87	4281.79	0.691294	0.536161	-
TXN	A0A8I3NPX8	Thioredoxin	89	9	100	9	9	1872.5	2105.37	1538.76	2069.88	1504.05	1371.07	1838.88	1648.33	0.896381	0.521834	-
NPEPPS	A0A8I3NVQ6	Aminopeptidase	64	47	107	47	47	1321.5	1743.89	1455.97	1650.75	1406.24	1346.66	1507.12	1467.88	0.973967	0.81417	-
HSPA5	A0A8I3NCJ5	78 kDa glucose-regulated protein	60	43	132	40	43	1499.4	1033.09	1880.86	1425.91	1721.39	1324.76	1471.12	1490.69	1.0133	0.947416	-
FABP5	A0A8I3NS19	Fatty acid binding protein 5	75	16	146	9	16	1640.4	3002.75	2152.37	3211.37	4533.6	1323.84	2265.17	3022.93	1.33453	0.513945	-
HSP90B1	A0A8I3NA23	Heat shock protein 90 beta family member 1	65	51	100	49	51	1310.5	801.639	1332.92	919.749	1006.27	1323.05	1148.35	1083.02	0.94311	0.775388	-
CALM2	A0A8I3MSQ7	Calmodulin 2	41	12	64	12	12	716.4	857.725	532.211	847.743	870.787	1309.86	702.112	1009.46	1.43775	0.171734	-
GSN	A0A8I3P0N3	Gelsolin	53	38	142	38	38	1930.5	1623.03	2218.43	1551.96	1654.64	1291.91	1923.98	1499.5	0.779374	0.117741	-
FN1	A0A8I3PHI4	Fibronectin 1	35	59	78	59	59	274.3	633.064	736.666	891.665	736.005	1277.93	548.01	968.533	1.76736	0.121556	-
PFN1	A0A8I3MSY8	Profilin	74	11	95	11	11	1401	1371.82	1114.88	1147.2	1274.28	1277.53	1295.9	1233	0.951466	0.578046	-
LTA4H	A0A8I3PTW1	Leukotriene A(4) hydrolase	57	34	86	34	34	1052.5	1591.59	1180.18	1152.42	1114.38	1275.56	1274.75	1180.79	0.926285	0.628012	-
HSPD1	A0A8I3PXL2	60 kDa heat shock protein, mitochondrial	77	41	93	41	41	1387.2	631.642	1320.46	747.653	781.873	1271.33	1113.1	933.62	0.838755	0.579172	-
ATP5F1B	A0A8I3NCH2	ATP synthase subunit beta	78	24	113	24	24	1470.9	513.624	1994.97	828.803	851.734	1262.89	1326.5	981.143	0.739648	0.51576	-
COPB2	A0A8I3PRZ5	Coatomer subunit beta'	56	41	60	41	41	1065.3	1264.71	1106.95	869.296	853.851	1253.79	1145.65	992.312	0.866155	0.370045	-
RARS1	A0A8I3RSP3	Arginine--tRNA ligase, cytoplasmic	60	41	67	41	41	1392.3	1199.93	1055.87	981.795	1012.77	1247.85	1216.03	1080.8	0.888795	0.353731	-
LOC481722	A0A8I3NH95	C4a anaphylatoxin	38	58	85	58	58	473.6	773.991	995.223	1202.38	1123.98	1242.31	747.605	1189.56	1.59116	0.0929914	-
G6PD	A0A8I3Q7C5	Glucose-6-phosphate 1-dehydrogenase	73	44	145	44	44	1823.5	2426.72	2151.62	1939.75	1865.35	1228.72	2133.95	1677.94	0.786309	0.189514	-
DOP1A	A0A8I3RYB4	DOP1 leucine zipper like protein A	0	1	1	1	1	22.5	25.1203	31.0771	47.0243	35.5654	1225.03	26.2325	435.873	16.6158	0.408249	-
CCT3	A0A8I3RV88	T-complex protein 1 subunit gamma	67	40	78	40	40	1377.4	1088.23	1206.6	1090.54	987.786	1217.25	1224.08	1098.52	0.89743	0.30892	-
YWHAZ	A0A8I3Q1P7	Tyrosine 3-monooxygenase/tryptophan 5-monooxygenase activation protein zeta	69	21	155	16	21	1539.4	1943.11	1584.93	1653.36	1934.36	1215.53	1689.15	1601.08	0.947864	0.741025	-
LYZ	A0A8I3NX55	Lysozyme	32	5	6	5	5	89	122.442	169.351	508.287	364.404	1214.08	126.931	695.59	5.48006	0.161693	-
ANXA8L1	A0A8I3N722	Annexin	56	19	49	3	19	922	242.83	419.478	766.104	800.362	1213.02	528.103	926.497	1.75439	0.192763	-
GPI	A0A8I3RTC4	Glucose-6-phosphate isomerase	60	30	113	30	30	1557	1803.29	1837.32	1782.02	2160.45	1197.33	1732.54	1713.27	0.988877	0.952771	-
EVPL	A0A8I3PDW6	Envoplakin	57	109	153	109	109	2287.2	1565.04	2261.08	2527.55	2964.63	1190.6	2037.78	2227.59	1.09315	0.768124	-
ATP5F1A	A0A1B1X469	ATP synthase subunit alpha	60	30	83	30	30	1453.1	503.197	1839.46	643.645	700.722	1162.5	1265.25	835.622	0.660438	0.399291	-
PRDX6	A0A8I3NWQ3	Peroxiredoxin-6	67	19	118	19	19	1091.2	1096.45	986.667	1260.19	1171.68	1161.05	1058.1	1197.64	1.13187	0.0436178	-
CFH	A0A8I3Q044	Sushi domain-containing protein	45	42	55	42	42	354.2	522.945	476.6	754.511	721.892	1156.96	451.248	877.787	1.94524	0.0792155	-
CCT8	A0A8I3P949	T-complex protein 1 subunit theta	49	37	93	37	37	1142.9	1329.01	1324.24	1207.45	1348.52	1144.95	1265.38	1233.64	0.974915	0.730443	-
PAPSS2	A0A8I3Q7N2	Uncharacterized protein	58	30	81	29	30	782.8	674.299	688.855	875.011	644.975	1125.69	715.318	881.892	1.23287	0.352906	-
PFKP	A0A8I3MP53	ATP-dependent 6-phosphofructokinase	42	28	50	24	28	502.3	659.606	622.926	635.481	746.449	1106.17	594.944	829.366	1.39402	0.23553	-
WDR1	A0A5K1UTD0	WD repeat domain 1	64	35	83	35	35	1231	1612.92	1300.33	1339.21	1416.83	1103.53	1381.42	1286.52	0.931308	0.564284	-
NCL	A0A8I3PNR2	Nucleolin	41	36	55	36	36	781.4	650.601	429.166	707.323	501.161	1102.61	620.389	770.363	1.24174	0.5126	-
A2M	A0A8I3QH15	Alpha-2-macroglobulin	35	39	45	39	39	186.9	251.677	327.253	305.494	300.894	1097.59	255.277	567.994	2.22501	0.358808	-
ACO2	A0A8I3NYC8	Aconitate hydratase, mitochondrial	56	43	102	43	43	1364.2	727.226	1566.06	740.796	838.468	1086.51	1219.16	888.591	0.728854	0.322833	-
GLUL	A0A8I3MWJ7	Glutamine synthetase	60	21	123	21	21	1777.3	2259.09	2528.57	2064.82	1757.38	1084.53	2188.32	1635.58	0.747412	0.207936	-
FKBP4	E2QWF5	peptidylprolyl isomerase	82	39	85	39	39	1145.5	1191.72	974.589	948.16	969.297	1081.37	1103.93	999.608	0.905495	0.263938	-
AHCY	A0A8I3NY33	Uncharacterized protein	54	27	70	25	27	1499.5	1312.26	1046.56	932.975	898.308	1080.18	1286.11	970.487	0.754593	0.123961	-
NASP	A0A8I3PBM7	Aldo-keto reductase family 1 member A1	73	25	89	11	25	1128.2	1615.6	1050.58	1197.65	1297.29	1069.89	1264.79	1188.28	0.939501	0.716718	-
CAPN1	A0A8I3S9F9	Calpain 1	63	45	98	45	45	1622.9	1855.59	1451.57	1689.93	1411.47	1064.88	1643.35	1388.76	0.845077	0.312694	-
MDH2	A0A8I3MS45	Malate dehydrogenase	66	20	75	20	20	1219	645.387	1583.55	810.679	980.588	1062.9	1149.31	951.388	0.827789	0.54844	-
SCIN	A0A8I3PYD4	Scinderin	62	43	86	43	43	1752	2091.31	1276.93	1144.91	853.71	1061.45	1706.75	1020.02	0.597641	0.0868763	-
CLIP1	A0A8I3PDK7	CAP-Gly domain containing linker protein 1	35	50	57	47	50	521.3	577.136	466.157	559.23	603.2	1061.05	521.531	741.16	1.42112	0.303181	-
HADHA	A0A8I3PUE4	enoyl-CoA hydratase	52	34	68	34	34	993.9	411.563	1786.12	646.584	654.995	1050.5	1063.86	784.025	0.736963	0.562723	-
MYO6	A0A8I3N5T5	Unconventional myosin-VI	46	57	86	57	57	833	937.51	716.661	917.79	777.922	1030.44	829.057	908.718	1.09609	0.458277	-
CAST	A0A8I3RSG0	Calpastatin	61	44	101	10	44	1467.5	1570.57	1021.14	1662.83	1806.35	1028.07	1353.07	1499.08	1.10791	0.646733	-
PDIA4	A0A8I3NL88	Protein disulfide-isomerase A4	60	43	61	43	43	1300.4	815.068	1123.05	794.188	698.041	1026.88	1079.51	839.704	0.777858	0.244508	-
CCT4	A0A8I3P2D7	T-complex protein 1 subunit delta	64	31	66	30	31	1185.6	967.528	994.845	858.519	857.662	1024.51	1049.32	913.563	0.87062	0.201702	-
SND1	A0A8I3S580	Staphylococcal nuclease domain-containing protein	49	42	58	42	42	1035.3	971.478	1046.05	898.033	796.692	1021.34	1017.61	905.356	0.889688	0.219748	-
LOC102152706	A0A8I3QNS0	Uncharacterized protein	27	9	46	6	9	1097.6	1499.64	650.732	1212.51	1604.96	1019.23	1082.66	1278.9	1.18126	0.552136	-
PGD	A0A8I3MQ54	6-phosphogluconate dehydrogenase, decarboxylating	70	35	113	34	35	1528	1632.51	1531.08	1250.88	1274.43	1018.7	1563.86	1181.34	0.755396	0.0284961	-
HNRNPA2B1	A0A8I3NCE9	Heterogeneous nuclear ribonucleoproteins A2/B1	49	23	60	19	23	1385.8	860.411	725.091	834.354	688.162	1012.24	990.434	844.918	0.853079	0.561943	-
IDH2	A0A2Z5XAD4	Isocitrate dehydrogenase [NADP]	55	25	55	24	25	888.7	402.715	895.952	627.317	621.406	1004.72	729.122	751.147	1.03021	0.920563	-
HSPA1	Q7YQC6	Heat shock 70 kDa protein 1	73	47	210	30	47	1674.9	2710.78	2327.64	2263.37	2082.13	991.791	2237.77	1779.1	0.795029	0.413538	-
RPS3	E2RH47	Small ribosomal subunit protein uS3	77	18	43	18	18	844.5	1153.64	970.94	809.699	847.923	989.68	989.693	882.434	0.891624	0.376273	-
MCEE	A0A8I3PG62	VOC domain-containing protein	34	5	8	5	5	390.1	242.198	344.868	233.815	273.232	975.564	325.722	494.204	1.51726	0.558675	-
KPNB1	A0A8I3NZP6	Uncharacterized protein	43	32	59	32	32	844.1	862.623	820.461	724.468	747.861	973.849	842.395	815.393	0.967946	0.767794	-
GMDS	A0A8I3NQ47	GDP-mannose 4,6-dehydratase	40	22	57	22	22	1031.9	898.961	866.762	760.552	661.77	969.364	932.541	797.229	0.854899	0.279898	-
LOC102153978	A0A8I3MD34	Uncharacterized protein	45	16	52	8	16	1364.9	1797.45	1241.57	1847.5	1690.06	968.572	1467.97	1502.04	1.02321	0.920974	-
SERPINC1	A0A8I3NHZ1	Antithrombin-III	45	27	66	27	27	793.5	1031.2	651.99	749.939	568.622	966.857	825.563	761.806	0.922772	0.710086	-
ATP6V1A	A0A8I3Q434	H(+)-transporting two-sector ATPase	73	34	96	34	34	1478.9	1563.15	1491.32	1245.16	1187.77	966.726	1511.12	1133.22	0.749918	0.0372939	-
UBR4	A0A8I3RSZ1	Ubiquitin protein ligase E3 component n-recognin 4	24	100	113	100	100	1048.2	1052.05	926.526	763.328	689.149	965.934	1008.93	806.137	0.799005	0.11776	-
ACADVL	A0A8I3P5V9	Acyl-CoA dehydrogenase very long chain	66	38	64	38	38	711.5	491.19	879.722	726.59	703.404	954.457	694.137	794.817	1.14504	0.5104	-
LDHB	A0A8I3NY38	L-lactate dehydrogenase	52	20	73	20	20	632.3	740.971	922.751	780.962	600.095	948.916	765.341	776.658	1.01479	0.935726	-
S100A12	A0A8I3MKN5	Protein S100	87	12	62	12	12	628.6	389.128	776.928	1912.32	1545.96	947.333	598.219	1468.54	2.45485	0.074828	-
PIGR	A0A8I3MFY4	Polymeric immunoglobulin receptor	62	36	230	36	36	1024.7	1325.85	7430.45	3155.2	2248.52	945.882	3260.33	2116.53	0.649177	0.645203	-
HK1	A0A8I3MVF3	hexokinase	52	48	79	44	48	1242.4	1541.66	1898.47	1281.08	1216	940.737	1560.84	1145.94	0.734179	0.147852	-
CCT2	A0A8I3NY48	T-complex protein 1 subunit beta	74	38	87	38	38	942	976.849	1010.82	962.691	823.084	936.911	976.558	907.562	0.929348	0.245992	-
PPP2R1A	A0A8I3MUF0	Uncharacterized protein	58	31	79	23	31	1015.1	1039.73	997.739	1017.23	1039.58	936.779	1017.52	997.862	0.980678	0.604461	-
TCP1	A0A8I3MR56	T-complex protein 1 subunit alpha	70	31	71	31	31	982.2	888.375	930.678	844.151	831.834	931.107	933.751	869.031	0.930688	0.194196	-
CKB	P05124	Creatine kinase B-type	66	23	98	22	23	694.1	877.474	683.319	622.582	546.888	928.732	751.631	699.401	0.93051	0.719485	-
KNG1	A0A8I3PBR7	Kininogen 1	52	23	49	23	23	265.6	356.266	326.498	434.485	508.077	924.247	316.122	622.269	1.96845	0.179162	-
HSP90AB1	A0A8I3N9V3	Heat shock protein 90 alpha family class B member 1	67	52	175	19	52	1247.6	1135.63	1008.94	785.044	984.54	923.059	1130.72	897.548	0.793783	0.063433	-
DPYD	A0A8I3P1X8	Dihydropyrimidine dehydrogenase [NADP(+)]	51	45	66	45	45	996.9	1555.72	943.134	1376.11	1104.08	920.949	1165.25	1133.71	0.972934	0.901121	-
ANXA2	A0A8I3P7T5	Annexin	68	30	69	30	30	1209.3	758.982	909.289	1501.02	1168.44	920.157	959.19	1196.54	1.24745	0.332942	-
SOD2	A0A8I3MMC9	Superoxide dismutase [Mn], mitochondrial	24	9	28	9	9	714	286.277	812.66	510.083	602.212	917.387	604.312	676.56	1.11955	0.741357	-
NME2	Q50KA8	Nucleoside diphosphate kinase B	82	13	63	10	13	1163.8	1387.62	1168.85	1183.77	1151.36	916.727	1240.09	1083.95	0.87409	0.236545	-
CA1	A0A8I3S2I1	Carbonic anhydrase	50	9	18	9	9	87.1	80.1007	103.926	126.541	140.991	908.416	90.3755	391.983	4.33727	0.363229	-
HRG	A0A8I3PET9	Histidine rich glycoprotein	18	9	16	9	9	255.5	125.918	162.935	435.791	366.239	902.348	181.451	568.126	3.13102	0.142381	-
HNRNPU	A0A8I3MPM7	Heterogeneous nuclear ribonucleoprotein U	41	33	58	32	33	1439.7	610.63	820.964	892.971	725.703	902.084	957.098	840.253	0.877917	0.688303	-
KIF5B	A0A8I3N413	Kinesin-like protein	67	64	92	64	64	1015.3	1378.14	1254.16	1334.97	1427.98	898.654	1215.87	1220.53	1.00384	0.982215	-
ANP32A	A0A8I3S455	Acidic leucine-rich nuclear phosphoprotein 32 family member	29	11	22	6	11	1059.4	598.938	615.503	358.887	279.583	896.807	757.947	511.759	0.675191	0.376094	-
GOT2	A0A8I3MPF7	Aspartate aminotransferase	43	21	42	21	21	753.7	469.861	858.836	781.289	745.602	892.321	694.132	806.404	1.16174	0.442976	-
TPPP3	A0A8I3N563	Tubulin polymerization promoting protein family member 3	36	10	24	10	10	65.4	71.2533	61.9026	94.7017	67.179	892.058	66.1853	351.313	5.30802	0.402377	-
IQGAP2	A0A8I3NHU8	IQ motif containing GTPase activating protein 2	44	59	85	56	59	870.8	933.876	615.377	802.841	457.975	891.398	806.685	717.405	0.889325	0.617901	-
GLOD4	A0A8I3NSX2	Glyoxalase domain containing 4	78	23	58	23	23	925.7	1099.45	950.431	947.996	812.64	891.266	991.86	883.968	0.891222	0.189364	-
PDCD6IP	A0A8I3PN55	BRO1 domain-containing protein	48	40	64	40	40	1049.9	1239.11	1033.22	1183.77	1156.72	889.815	1107.41	1076.77	0.97233	0.804001	-
HSP70	A0A8I3RZR2	Heat shock protein 70	68	46	206	29	46	1470	2404.28	2021.02	1975.67	1800	887.308	1965.1	1554.33	0.790966	0.398624	-
AGR2	A0A8I3N0R3	Anterior gradient 2, protein disulphide isomerase family member	66	11	42	11	11	636.4	355.634	531.456	329.986	310.774	886.517	507.83	509.092	1.00248	0.995528	-
HSPA9	A0A8I3PIQ1	Stress-70 protein, mitochondrial	63	42	78	41	42	1027.4	566.393	1220.06	903.584	910.022	883.746	937.951	899.118	0.958598	0.859861	-
FGG	A0A8I3N8Y1	Fibrinogen gamma chain	49	19	36	19	19	263.6	466.227	367.264	603.315	333.355	882.559	365.697	606.41	1.65823	0.265047	-
PSMD1	A0A8I3PBB2	26S proteasome non-ATPase regulatory subunit 1	49	42	87	42	42	1245.3	1262.02	1319.96	1183.93	1187.63	880.053	1275.76	1083.87	0.849589	0.195982	-
PDXDC1	A0A8I3RXH1	Uncharacterized protein	52	34	57	34	34	1253.7	1056.32	994.09	735.407	570.175	878.47	1101.37	728.017	0.661011	0.0353446	Down
SULT1A1	Q29476	Sulfotransferase 1A1	66	18	119	18	18	1632.4	1829.52	1481.26	1608.46	1182.12	871.214	1647.73	1220.6	0.740778	0.17325	-
COPA	A0A8I3Q9Z2	Coatomer subunit alpha	54	60	99	60	60	779.8	932.454	848.267	686.097	628.886	870.29	853.507	728.425	0.853449	0.230346	-
ACSL1	A0A8I3PFJ0	Long-chain-fatty-acid--CoA ligase	47	36	63	35	36	1192.3	1585.58	1487.3	1078.13	743.768	869.103	1421.73	897	0.630923	0.028188	Down
LAP3	A0A8I3MBN3	Cytosol aminopeptidase	64	28	52	28	28	554.9	631.8	544.164	580.456	569.893	868.971	576.955	673.107	1.16665	0.432683	-
SERPINB1	A0A8I3P1P3	Serpin family B member 1	57	30	91	29	30	1167.3	3317.15	1124.31	1272.59	1360.38	866.992	1869.59	1166.65	0.624017	0.435205	-
CP	A0A8I3PMF7	Ceruloplasmin	37	39	76	39	39	488.1	674.773	2413.45	792.718	901.554	862.903	1192.11	852.392	0.71503	0.635332	-
RUVBL2	A0A8I3MBF5	RuvB-like helicase	60	26	38	26	26	489.5	461.013	472.951	383.705	332.649	858.945	474.488	525.1	1.10667	0.791264	-
YWHAQ	A0A8I3PQU8	14-3-3 protein theta	75	23	126	16	23	955.4	1358.55	948.041	1249.25	1224.32	852.877	1087.33	1108.82	1.01976	0.913907	-
FLNA	A0A8I3Q522	Uncharacterized protein	31	65	78	56	65	520.3	562.443	485.281	686.587	847.641	851.821	522.675	795.35	1.52169	0.0246089	UP
APOE	P18649	Apolipoprotein E	43	14	22	14	14	109.4	94.7937	158.657	130.296	188.271	850.766	120.95	389.778	3.22263	0.364663	-
PLG	A0A8I3MF27	Plasminogen	58	35	57	35	35	271.9	388.97	392.553	522.329	532.069	842.983	351.141	632.46	1.80116	0.102344	-
OR	D5LG84	NADPH--cytochrome P450 reductase	57	38	111	38	38	1792.8	801.955	1153.38	1000.25	796.551	842.719	1249.38	879.838	0.704222	0.329857	-
TUT1	A0A8I3NDU5	Elongation factor 1-gamma	48	23	73	23	23	930.6	1043.36	970.562	1025.23	1112.41	841.004	981.508	992.879	1.01158	0.904759	-
ACSF2	A0A8I3NN39	Acyl-CoA synthetase family member 2	57	30	55	30	30	1116.4	413.775	1110.6	633.685	659.229	839.816	880.258	710.91	0.807616	0.548086	-
ckpi	A8QWU1	Protease inhibitor	53	6	44	6	6	588.1	547.434	821.468	593.845	2440.46	835.595	652.334	1289.97	1.97746	0.385963	-
LOC100687441	A0A8I3N928	Uteroglobin	56	4	142	4	4	2104.2	6742.05	1577.13	3117.97	2612.64	830.582	3474.46	2187.07	0.629469	0.527539	-
PGM1	A0A8I3MXZ7	Phosphoglucomutase 1	59	33	70	33	33	1126.5	1453.03	1181.18	1221.98	914.538	828.339	1253.57	988.285	0.788376	0.167114	-
ADSS2	A0A8I3MVB5	Adenylosuccinate synthetase isozyme 2	28	14	22	13	14	449.3	513.308	411.677	477.264	505.96	825.305	458.095	602.843	1.31598	0.32296	-
POR	A0A8I3MSA7	NADPH--cytochrome P450 reductase	40	37	106	37	37	1784.5	758.508	1136.89	885.95	708.343	822.798	1226.63	805.697	0.656836	0.293894	-
TTR	A0A8I3NFK0	Transthyretin	66	7	19	7	7	241.6	309.502	341.471	410.483	472.794	822.798	297.524	568.692	1.91141	0.163369	-
PSMD13	A0A8I3S6Q5	26S proteasome non-ATPase regulatory subunit 13	69	25	60	25	25	813.5	960.892	923.38	1066.37	1036.62	820.292	899.258	974.428	1.08359	0.45844	-
RUVBL1	A0A8I3P6G1	RuvB-like helicase	60	23	40	23	23	298.3	381.545	300.077	290.799	244.582	818.181	326.64	451.188	1.3813	0.569517	-
PGAM1	A0A8I3SC19	Phosphoglycerate mutase	73	18	87	14	18	988.4	1043.36	901.991	1112.25	1246.62	817.39	977.918	1058.76	1.08266	0.596288	-
XPO1	A0A8I3NNH1	Exportin 1	42	38	58	38	38	810.9	855.671	662.056	658.666	558.179	815.147	776.209	677.331	0.872614	0.359618	-
PYGB	A0A8I3Q6I7	Alpha-1,4 glucan phosphorylase	60	46	92	34	46	1264.4	1088.23	997.991	1020.33	960.547	814.092	1116.87	931.656	0.834164	0.139853	-
MGAM	A0A8I3SCS0	Maltase-glucoamylase	18	28	36	28	28	143.9	177.896	206.719	380.603	227.082	811.849	176.172	473.178	2.68589	0.230892	-
ADK	A0A8I3RVD3	Adenosine kinase	54	19	24	19	19	442	375.067	435.457	412.605	435.817	810.002	417.508	552.808	1.32407	0.403956	-
EIF4G1	A0A8I3PYS5	Eukaryotic translation initiation factor 4 gamma 1	33	48	68	42	48	1029.3	980.799	800.833	912.075	851.734	805.385	936.978	856.398	0.914	0.373144	-
CD5L	A0A8I3NQW4	CD5 molecule like	47	14	14	14	14	83.9	147.878	100.277	171.116	123.773	805.253	110.685	366.714	3.31313	0.363959	-
HSPA2	A0A8I3N1B1	Heat shock protein family A (Hsp70) member 2	70	48	170	30	48	1047.3	1869.81	1210.5	1777.62	1514.49	804.989	1375.87	1365.7	0.992609	0.980174	-
RSPH1	A0A8I3NQJ0	Radial spoke head component 1	21	6	7	6	6	63.3	71.7273	68.6968	85.3948	78.3285	803.538	67.908	322.42	4.7479	0.400977	-
PEBP1	Q3YIX4	Phosphatidylethanolamine-binding protein 1	84	15	66	15	15	1209.7	1598.54	1265.73	1241.41	1373.5	803.01	1357.99	1139.31	0.838965	0.364374	-
DCXR	A0A8I3N7Q9	Dicarbonyl and L-xylulose reductase	84	14	42	13	14	705.3	653.129	439.232	543.881	501.02	800.899	599.22	615.267	1.02678	0.903451	-
PRDX2	A0A8I3NZ15	Peroxiredoxin 2	71	11	42	10	11	354.5	430.522	323.479	417.014	406.602	796.546	369.5	540.054	1.46158	0.313776	-
CFB	A0A8I3NLH3	Complement C2	37	24	45	24	24	329	488.188	614.748	649.849	799.938	794.435	477.312	748.074	1.56726	0.06092	-
RNPEP	A0A8I3NUR2	Arginyl aminopeptidase	47	29	55	29	29	986.8	1240.06	782.841	954.691	809.112	791.005	1003.23	851.603	0.848858	0.374683	-
FGB	A0A8I3NBD6	Fibrinogen beta chain	61	27	46	27	27	246.2	278.22	272.522	453.098	228.917	790.346	265.647	490.787	1.84751	0.301468	-
PADI1	A0A8I3MRG2	Protein-arginine deiminase	48	29	81	26	29	750.9	2182.15	867.517	1439.96	1031.68	789.95	1266.86	1087.19	0.858183	0.744244	-
ARHGAP1	A0A8I3PTG9	Rho GTPase activating protein 1	52	24	57	24	24	742.4	849.51	715.906	772.145	650.62	787.575	769.272	736.78	0.957763	0.614303	-
COPB1	A0A8I3PLJ3	Coatomer subunit beta	50	41	75	41	41	913.8	915.865	727.356	535.881	525.436	786.652	852.34	615.989	0.722704	0.0953933	-
TAGLN2	A0A8I3SCV9	Transgelin	80	16	53	16	16	925.5	850.616	598.392	703.078	724.574	786.388	791.503	738.013	0.932421	0.64721	-
PSME1	A0A8I3MU16	Uncharacterized protein	71	21	67	21	21	1262.3	1070.38	1008.43	892.155	943.611	785.992	1113.7	873.919	0.784696	0.0676728	-
LOC100855903	A0A8I3NCX8	Uncharacterized protein	61	15	124	11	15	1009.5	1186.34	1051.09	1094.62	1252.69	784.673	1082.31	1043.99	0.964599	0.814244	-
CYP2A13	Q307K8	Cytochrome P450	62	30	88	8	30	2583.2	1014.29	1422.12	1006.78	628.463	784.145	1673.21	806.461	0.481986	0.201828	-
HNRNPR	A0A8I3NWS4	Heterogeneous nuclear ribonucleoprotein R	42	25	40	21	25	789.7	296.546	413.187	692.792	563.401	782.826	499.811	679.673	1.35986	0.35528	-
ST13	A0A8I3NYR1	ST13 Hsp70 interacting protein	37	15	47	15	15	987.3	1048.42	774.412	492.775	569.328	781.375	936.71	614.493	0.656012	0.0547403	-
LOC119881714	A0A8I3N3J9	STI1 domain-containing protein	37	15	47	15	15	987.3	1048.42	774.412	492.775	569.328	781.375	936.71	614.493	0.656012	0.0547403	-
PTGR1	A0A8I3MRC0	Prostaglandin reductase 1	63	20	89	20	20	1122	1699.49	1431.43	1207.12	1329.61	778.341	1417.64	1105.02	0.779479	0.25616	-
CALR	A0A8I3NM03	Calreticulin	70	29	62	29	29	903.2	546.802	952.822	717.937	925.405	776.758	800.941	806.7	1.00719	0.970294	-
RPS27A	A0A8I3NFB9	Ubiquitin-ribosomal protein eS31 fusion protein	54	8	62	8	8	650.5	676.353	661.175	812.801	877.561	774.779	662.676	821.714	1.23999	0.0278499	-
UBC	A0A8I3QYD0	Ubiquitin-like domain-containing protein	28	6	60	6	6	650.5	676.353	661.175	812.801	877.561	774.779	662.676	821.714	1.23999	0.0278499	-
UBA52	P63050	Ubiquitin-ribosomal protein eL40 fusion protein	41	6	60	6	6	650.5	676.353	661.175	812.801	877.561	774.779	662.676	821.714	1.23999	0.0278499	-
UBB	A0A8I3MMN5	Ubiquitin B	68	6	60	6	6	650.5	676.353	661.175	812.801	877.561	774.779	662.676	821.714	1.23999	0.0278499	-
LOC100685053	A0A8I3MXY6	Uncharacterized protein	56	5	53	5	5	650.5	676.353	661.175	812.801	877.561	774.779	662.676	821.714	1.23999	0.0278499	-
PNP	A0A8I3PDN5	Purine nucleoside phosphorylase	79	18	128	18	18	1261.5	1667.9	1433.57	1293.98	1076.13	773.855	1454.32	1047.99	0.720604	0.104985	-
HYOU1	A0A8I3MG67	Hypoxia up-regulated 1	38	37	55	37	37	765.5	488.662	857.074	634.011	646.527	771.085	703.745	683.875	0.971764	0.879539	-
LMNA	A0A8I3NEK0	Lamin A/C	58	41	76	40	41	706.4	1134.05	1202.82	1728.96	1485.14	769.898	1014.42	1328	1.30911	0.406808	-
RAB8A	A0A8I3Q497	RAB8A, member RAS onco family	77	34	54	11	34	617.1	1257.44	868.901	1199.94	1598.32	768.051	914.48	1188.77	1.29994	0.420258	-
LOC100856782	A0A8I3S301	T-complex protein 1 subunit eta	70	36	77	36	36	891.4	881.266	729.494	743.898	672.355	767.523	834.053	727.925	0.872756	0.170484	-
RNF213	A0A8I3RZP8	Ring finger protein 213	19	84	89	84	84	809.9	732.914	669.605	613.438	490.153	767.523	737.473	623.705	0.845732	0.296163	-
GDI2	A0A8I3MTF3	Rab GDP dissociation inhibitor	66	33	66	3	33	820.6	1220.79	1014.72	1069.15	1134.85	765.676	1018.7	989.89	0.971716	0.867563	-
ANXA5	A0A0F7RNT6	Annexin	78	24	56	24	24	1270.1	486.45	526.298	446.404	312.326	763.17	760.949	507.3	0.666667	0.442527	-
AFM	A0A8I3NCZ8	Afamin	42	22	30	22	22	176.8	297.652	268.119	223.202	404.062	761.191	247.524	462.818	1.86979	0.304796	-
SCP2	A0A8I3S339	Sterol carrier protein 2	43	23	42	23	23	1111	364.166	733.017	411.626	351.984	756.442	736.061	506.684	0.688372	0.421812	-
IDE	A0A8I3QMN5	Insulin degrading enzyme	35	46	81	46	46	988	881.424	1314.55	1291.04	2155.52	754.067	1061.32	1400.21	1.3193	0.499584	-
LOC106558887	E2QZG2	Ribosomal protein L23/L25 N-terminal domain-containing protein	41	9	17	9	9	387.7	189.903	187.092	292.922	284.523	751.956	254.898	443.134	1.73847	0.352008	-
ACSS2	A0A8I3P3P4	propionate--CoA ligase	41	27	48	27	27	667.8	920.763	674.512	838.926	771.289	747.735	754.358	785.983	1.04192	0.747155	-
LZTFL1	A0A8I3RX08	Leucine zipper transcription factor-like protein 1	38	10	14	10	10	172	248.518	194.893	275.941	218.05	747.735	205.137	413.908	2.01772	0.338962	-
PPA1	A0A8I3MVP9	inorganic diphosphatase	83	25	64	25	25	990.8	981.747	934.075	802.841	816.027	747.471	968.874	788.78	0.81412	0.00308049	-
PLS1	A0A8I3Q6J7	Plastin 1	53	34	64	29	34	786.7	1133.42	990.945	1022.45	923.853	739.951	970.354	895.418	0.922775	0.597085	-
COPG1	A0A8I3PC55	Coatomer subunit gamma	58	40	55	36	40	841.4	808.275	704.331	518.247	520.073	737.841	784.668	592.053	0.754527	0.100518	-
PSMC6	A0A8I3RRR7	Proteasome 26S subunit, ATPase 6	70	25	54	25	25	818	606.838	624.688	653.441	620.7	737.049	683.175	670.397	0.981296	0.877178	-
PSMC3	A0A8I3PF55	Uncharacterized protein	71	27	73	27	27	861.1	755.506	812.535	779.656	850.323	733.487	809.714	787.822	0.972964	0.656967	-
DPP3	A0A8I3NJB8	Dipeptidyl peptidase 3	60	36	75	36	36	903.8	1046.21	906.018	949.302	902.683	731.772	952.008	861.252	0.904669	0.33237	-
ANXA3	A0A8I3RZ65	Annexin	64	24	38	23	24	733.6	186.902	211.249	265.981	192.363	731.113	377.25	396.486	1.05099	0.941308	-
SLK	A0A8I3Q3F0	non-specific serine/threonine protein kinase	42	50	70	48	50	866.8	1126.15	734.653	908.646	826.33	729.793	909.201	821.59	0.90364	0.540743	-
PSMA7	A0A8I3NW81	Proteasome subunit alpha type	65	19	56	19	19	959.4	1080.49	1065.3	973.958	949.821	727.287	1035.06	883.688	0.853752	0.184605	-
LOC609911	A0A8I3MII5	L-lactate dehydrogenase	30	12	51	12	12	514.7	612.367	718.674	576.374	418.175	723.197	615.247	572.582	0.930654	0.710602	-
BZW1	A0A8I3Q693	Uncharacterized protein	48	19	31	11	19	618.5	675.721	501.134	578.986	518.52	722.274	598.452	606.594	1.0136	0.923301	-
S100A4	A0A8I3MK67	S100 calcium binding protein A4	41	9	55	9	9	1352	1201.04	846.128	1034.04	1350.92	722.01	1133.05	1035.66	0.91404	0.701069	-
FLII	A0A8I3PF37	FLII actin remodeling protein	34	37	51	37	37	523.2	719.8	665.705	809.373	660.782	721.614	636.235	730.59	1.1483	0.270301	-
DDX17	A0A8I3S7P0	DEAD-box helicase 17	39	28	33	19	28	715.8	450.428	387.143	469.916	357.488	721.35	517.79	516.252	0.997028	0.992169	-
PREP	A0A8I3N6C8	Prolyl endopeptidase	63	39	73	39	39	807.8	1008.45	812.409	820.149	842.843	717.92	876.219	793.637	0.905753	0.354562	-
HSPA4L	A0A8I3P2E0	Heat shock protein family A (Hsp70) member 4 like	42	30	34	26	30	214.1	249.15	236.035	277.411	273.232	717.393	233.095	422.679	1.81333	0.32692	-
CCT6A	A0A8I3NC97	Chaperonin containing TCP1 subunit 6A	50	25	55	25	25	843.5	819.334	800.456	629.929	632.979	715.678	821.097	659.529	0.803229	0.0165062	-
SERPINA1	A1ILJ0	Alpha 1 antitrypsin	21	9	29	8	9	126	186.428	239.181	190.71	435.958	715.15	183.869	447.272	2.43256	0.220612	-
DCTN1	A0A8I3PDN0	Dynactin subunit 1	44	51	70	51	51	824.4	979.377	807.753	817.537	756.187	713.567	870.51	762.43	0.875843	0.17839	-
TWF1	A0A8I3QIT6	Twinfilin actin binding protein 1	65	20	32	17	20	679.7	833.079	667.34	778.676	794.999	710.665	726.706	761.447	1.0478	0.600188	-
LGALS3	A0A8I3NWF7	Galectin 3	35	13	51	13	13	1181.8	1480.36	887.145	1681.12	766.772	709.873	1183.1	1052.59	0.889684	0.739156	-
PPIB	A0A8I3PCB7	Peptidyl-prolyl cis-trans isomerase	61	15	30	14	15	511.9	526.105	632.111	707.323	646.527	709.873	556.705	687.908	1.23568	0.0538097	-
ATIC	A0A8I3PLK1	Bifunctional purine biosynthesis protein ATIC	81	41	93	41	41	807.5	971.952	874.563	1044.17	975.789	709.213	884.672	909.723	1.02832	0.839254	-
KTN1	A0A8I3NYX9	Kinectin 1	47	63	78	63	63	1101.5	731.966	581.532	766.43	629.168	707.235	804.999	700.944	0.870739	0.574219	-
LOC480188	A0A8I3MKQ4	RRM domain-containing protein	36	15	26	15	15	893.4	666.874	510.822	585.028	490.717	704.86	690.365	593.535	0.85974	0.499625	-
EIF3A	A0A8I3NXD1	Eukaryotic translation initiation factor 3 subunit A	33	46	66	46	46	830.6	683.147	571.089	519.39	492.552	699.715	694.945	570.552	0.821003	0.280208	-
TARS1	A0A8I3MZD1	threonine--tRNA ligase	46	31	49	29	31	871.2	1046.68	934.578	827.007	913.832	693.383	950.82	811.407	0.853377	0.16821	-
XDH	A0A8I3NBF8	Xanthine dehydrogenase/oxidase	39	48	83	45	48	802.4	962.946	1127.58	961.712	1565.86	692.591	964.31	1073.39	1.11312	0.722526	-
RAB2A	P61105	Ras-related protein Rab-2A	46	10	16	6	10	661.8	637.646	593.485	678.097	527.553	692.591	630.977	632.747	1.00281	0.977254	-
RNH1	A0A8I3Q8W6	Ribonuclease inhibitor	52	19	31	19	19	559.1	567.34	566.686	487.06	519.085	691.272	564.375	565.806	1.00253	0.984058	-
UGP2	A0A8I3S420	UTP--glucose-1-phosphate uridylyltransferase	47	21	38	21	21	574.1	776.993	625.694	927.75	730.36	690.876	658.929	782.995	1.18828	0.264886	-
ARCN1	A0A8I3MEN1	Coatomer subunit delta	55	30	53	30	30	770	649.179	699.55	544.698	542.795	689.557	706.243	592.35	0.838734	0.137214	-
LOC479795	A0A8I3RSA1	Eukaryotic translation initiation factor 3 subunit C	34	31	41	31	31	683.3	609.524	544.793	478.896	295.249	679.795	612.539	484.647	0.79121	0.371549	-
ADIRF	A0A8I3RTQ4	Adipogenesis regulatory factor	80	7	50	7	7	1141.7	1558.57	468.673	1235.53	1455.78	679.531	1056.31	1123.61	1.06371	0.872969	-
STAT3	A0A8I3RV66	Signal transducer and activator of transcription	52	35	49	35	35	609.5	791.37	556.998	594.661	449.224	679.003	652.622	574.296	0.879982	0.467796	-
ACLY	A0A8I3NHY9	ATP-citrate synthase	44	43	70	43	43	594.1	706.055	646.958	684.464	666.709	678.476	649.038	676.55	1.04239	0.485532	-
LOC100685620	A0A8I3NBJ3	Alpha-1-acid glycoprotein	41	10	22	10	10	277.3	301.444	224.586	599.07	536.726	677.816	267.777	604.537	2.25762	0.00477357	UP
ARF3	A0A8I3PKU9	Uncharacterized protein	28	12	33	2	12	578.7	605.89	553.978	533.921	436.946	675.046	579.523	548.638	0.946706	0.701727	-
ARF1	A0A8I3N366	ADP-ribosylation factor	67	12	33	2	12	578.7	605.89	553.978	533.921	436.946	675.046	579.523	548.638	0.946706	0.701727	-
RPS8	A0A8I3PPA9	40S ribosomal protein S8	46	8	18	8	8	660	504.619	436.715	334.885	478.439	673.463	533.778	495.595	0.928467	0.765186	-
APOA2	E2RAK7	Apolipoprotein A-II	21	3	6	3	3	127.1	102.693	64.419	106.948	144.943	672.935	98.0707	308.275	3.1434	0.368737	-
SUCLG2	A0A8I3NE82	Succinate--CoA ligase [GDP-forming] subunit beta, mitochondrial	54	28	41	27	28	1226.9	434.787	746.983	466.651	476.745	672.407	802.89	538.601	0.670828	0.371087	-
LOC475399	A0A8I3PKW8	Uncharacterized protein	39	18	32	18	18	896.2	583.771	626.449	568.536	515.557	669.505	702.14	584.533	0.832501	0.359481	-
HNRNPC	A0A8I3PNS7	RRM domain-containing protein	37	17	31	17	17	650.6	575.398	594.743	568.536	515.557	669.505	606.914	584.533	0.963123	0.688053	-
RAB14	A0A8I3NXU2	Ras-related protein Rab-14	31	15	23	15	15	801.3	509.99	507.928	600.539	563.259	668.318	606.406	610.705	1.00709	0.969694	-
CLCA1	A0A8I3P659	Chloride channel accessory 1	31	24	29	23	24	156.2	562.127	497.863	293.902	358.759	668.186	405.397	440.282	1.08605	0.848284	-
LOC102154266	A0A8I3NIP0	Uncharacterized protein	21	7	45	3	7	751.9	716.799	670.36	771.818	706.085	663.964	713.019	713.956	1.00131	0.982201	-
HDLBP	A0A8I3PSM2	High density lipoprotein binding protein	45	47	63	47	47	634.1	620.899	400.731	461.099	351.843	663.568	551.91	492.17	0.891758	0.64182	-
PABPC1	A0A8I3Q1H4	Polyadenylate-binding protein	43	30	50	23	30	725	762.3	705.841	650.992	674.613	660.138	731.047	661.915	0.905434	0.0379333	-
LOC119866380	A0A8I3PK18	STI1 domain-containing protein	32	12	42	12	12	880.7	847.614	708.357	434.811	551.828	655.389	812.224	547.343	0.673882	0.0344894	-
EIF4H	A0A8I3MHM6	Eukaryotic translation initiation factor 4H	46	9	18	9	9	648.3	274.27	417.088	289.167	373.013	653.41	446.553	438.53	0.982035	0.961187	-
FETUB	A0A8I3PDJ5	Fetuin B	49	19	34	19	19	196.2	206.966	241.823	293.902	282.97	650.376	214.996	409.083	1.90274	0.248077	-
PGM2	A0A8I3MSC7	Phosphoglucomutase 2	50	33	67	32	33	722.9	1058.85	905.766	838.763	830.846	650.112	895.837	773.241	0.863148	0.356446	-
LOC100687152	A0A8I3QD35	Uncharacterized protein	51	20	59	20	20	699.4	686.465	742.957	715.487	715.965	649.189	709.607	693.547	0.977367	0.598822	-
QARS1	A0A8I3S702	glutamine--tRNA ligase	46	31	54	30	31	690.6	635.908	602.544	570.822	579.066	646.682	643.017	598.857	0.931323	0.277761	-
ATP1A1	A0A8I3Q559	Sodium/potassium-transporting ATPase subunit alpha	45	41	70	26	41	913.2	479.182	651.361	946.527	521.484	646.287	681.248	704.766	1.03452	0.901493	-
GFPT1	A0A8I3PXJ0	glutamine--fructose-6-phosphate transaminase (isomerizing)	50	30	50	30	30	468.1	435.735	531.079	411.789	381.763	642.593	478.305	478.715	1.00086	0.996595	-
ACTR3	A0A8I3N1W6	Actin related protein 3	67	25	67	25	25	1002.8	1053	882.112	1012.49	850.464	640.878	979.304	834.611	0.852249	0.314886	-
PPIA	A0A8I3N9K7	Uncharacterized protein	21	5	30	4	5	546.5	778.099	445.271	668.137	534.327	640.482	589.956	614.315	1.04129	0.835657	-
AHCYL2	A0A8I3S4H8	Adenosylhomocysteinase like 2	46	30	54	14	30	801.6	746.501	656.394	483.795	524.166	640.086	734.832	549.349	0.747585	0.0430031	-
F5	A0A8I3MLH1	Coagulation factor V	26	58	83	58	58	754.4	1192.51	1777.69	1354.07	1071.62	639.691	1241.53	1021.79	0.823011	0.580141	-
LOC119881680	A0A8I3PBL9	Heterogeneous nuclear ribonucleoprotein A3	40	20	47	18	20	762	282.801	312.533	464.855	408.437	637.184	452.445	503.492	1.11283	0.784664	-
RPLP0	A0A8I3QJZ3	60S acidic ribosomal protein P0	50	12	27	12	12	756.9	785.682	608.331	352.682	362.569	635.733	716.971	450.328	0.628098	0.0832675	-
DDB1	A0A8I3NKI4	DNA damage-binding protein 1	41	44	67	44	44	730	867.521	791.145	777.533	775.946	631.907	796.222	728.462	0.914898	0.341722	-
LOC608162	A0A8I3N9X5	Small ribosomal subunit protein uS5	44	15	30	6	15	584.5	658.342	564.924	542.412	431.442	631.511	602.589	535.122	0.888038	0.374368	-
SERPINB5	A0A8I3MKP5	Serpin B5	78	30	77	30	30	1046.3	1449.87	1191.88	1187.53	1437.43	629.533	1229.35	1084.83	0.882443	0.626082	-
LOC100855476	A0A8I3ML63	Sushi domain-containing protein	35	17	24	17	17	156.2	247.254	198.038	295.698	274.361	627.422	200.497	399.16	1.99085	0.220332	-
LCP1	A0A8I3NAM1	Lymphocyte cytosolic protein 1	67	37	85	29	37	728.1	938.458	718.422	568.21	577.373	627.29	794.993	590.957	0.743349	0.096624	-
ACSM3	A0A8I3N6J5	Acyl-CoA synthetase medium chain family member 3	57	31	50	29	31	1262.9	388.496	1072.6	494.898	652.314	626.498	907.999	591.237	0.651142	0.35489	-
CAPN2	A0A8I3NF92	Calpain-2 catalytic subunit	61	35	57	35	35	948.5	869.258	771.266	851.009	714.694	625.311	863.008	730.338	0.84627	0.190445	-
PSMC1	A0A8I3NNJ9	Proteasome 26S subunit, ATPase 1	68	21	44	9	21	882.3	586.457	762.962	511.552	522.331	624.783	743.906	552.889	0.743224	0.143482	-
PFKL	A0A8I3PBD8	ATP-dependent 6-phosphofructokinase	42	27	55	21	27	560.6	446.162	513.213	487.224	462.773	621.353	506.658	523.783	1.0338	0.789449	-
LOC100683250	A0A8I3Q072	Uncharacterized protein	55	44	147	30	44	1093.7	469.071	1378.72	1650.09	6603.3	619.77	980.496	2957.72	3.01656	0.396584	-
EEA1	A0A8I3PDC5	Early endosome antigen 1	41	52	55	51	52	524	563.391	345.497	577.517	503.702	619.506	477.629	566.908	1.18692	0.321138	-
CMAS	A0A8I3NVQ5	N-acylneuraminate cytidylyltransferase	51	20	28	20	20	448.2	479.34	427.405	453.262	388.961	618.055	451.648	486.759	1.07774	0.661229	-
PSMA4	A0A8I3NP66	Proteasome subunit alpha type	59	16	37	16	16	751.7	774.307	812.157	744.061	646.81	617.923	779.388	669.598	0.859133	0.0848722	-
WARS1	A0A8I3MMH0	Tryptophan--tRNA ligase, cytoplasmic	68	31	58	31	31	884.3	793.424	1188.48	607.723	515.274	616.868	955.401	579.955	0.607028	0.0790813	-
CLIC6	A0A8I3PSA7	Chloride intracellular channel protein	59	28	62	25	28	911.7	660.554	564.169	513.675	409.284	616.472	712.141	513.144	0.720565	0.189047	-
EEF1B2	A0A8I3PJ02	Elongation factor 1-beta	79	19	57	16	19	656	582.507	705.086	507.634	645.54	613.966	647.864	589.046	0.909212	0.345342	-
HNRNPL	A0A8I3MVT0	Heterogeneous nuclear ribonucleoprotein L	38	17	33	16	17	448.6	477.128	402.115	485.754	382.328	613.042	442.615	493.708	1.11544	0.530635	-
SLC9A3R1	A0A8I3P3L2	Na(+)/H(+) exchange regulatory cofactor NHE-RF	68	24	41	24	24	812.5	442.371	405.764	381.909	382.892	612.91	553.545	459.237	0.829629	0.573252	-
ALDH9A1	A0A8I3S4S9	Uncharacterized protein	46	23	44	23	23	684.3	549.488	837.572	413.912	411.683	612.646	690.453	479.414	0.694346	0.122221	-
CTSD	A0A8I3N9F5	Cathepsin D	54	18	55	18	18	778	800.059	818.7	895.257	759.433	611.591	798.92	755.427	0.945561	0.649806	-
LOC477556	A0A8I3PRA4	glutathione transferase	63	20	62	19	20	1427.5	1216.52	646.454	677.77	811.511	609.48	1096.82	699.587	0.63783	0.226346	-
OGDH	A0A8I3NWZ0	oxoglutarate dehydrogenase (succinyl-transferring)	31	33	47	26	33	567.7	352.159	746.354	509.919	461.644	608.557	555.404	526.707	0.94833	0.831382	-
SNRNP200	A0A8I3RT08	U5 small nuclear ribonucleoprotein 200 kDa helicase	31	51	63	51	51	661.4	580.296	605.941	463.058	285.793	608.029	615.879	452.294	0.734387	0.216459	-
Hsp27	F1PYE3	Heat shock protein beta-1	49	16	51	16	16	1261.2	691.362	655.01	683.321	857.803	607.106	869.191	716.077	0.823843	0.526585	-
HSPB1	P42929	Heat shock protein beta-1	48	16	51	16	16	1261.2	691.362	655.01	683.321	857.803	607.106	869.191	716.077	0.823843	0.526585	-
UPP1	A0A8I3RUZ7	Uncharacterized protein	62	15	44	15	15	1005.6	1126.31	758.433	850.192	848.065	604.072	963.447	767.443	0.79656	0.227055	-
IPO5	A0A8I3PAU2	Importin 5	52	44	82	44	44	965.1	1137.37	990.819	908.809	688.585	603.28	1031.1	733.558	0.711436	0.0612431	-
GPD1L	A0A8I3PF25	Glycerol-3-phosphate dehydrogenase [NAD(+)]	72	20	43	20	20	555.8	948.253	616.635	975.101	537.714	602.884	706.896	705.233	0.997647	0.993183	-
PSMC4	A0A8I3MR89	Proteasome 26S subunit, ATPase 4	55	24	54	24	24	690.2	558.335	599.147	531.962	498.762	602.488	615.894	544.404	0.883925	0.226349	-
LOC476006	A0A8I3NDR4	Glutathione S-transferase	52	11	66	8	11	1018.5	1500.9	1274.04	1222.47	948.551	599.982	1264.48	923.667	0.730472	0.213207	-
TPP2	A0A8I3QCC9	Tripeptidyl-peptidase 2	47	50	68	50	50	589.4	765.301	694.14	762.675	756.046	599.322	682.947	706.014	1.03378	0.770513	-
LOC119868937	A0A8I3PK68	Cornifin	88	9	108	9	9	1173.7	920.289	781.457	2498.65	5810.14	598.927	958.482	2969.24	3.09786	0.317288	-
COQ10B	A0A8I3PNX9	10 kDa heat shock protein, mitochondrial	79	11	28	11	11	718.9	364.64	618.523	431.546	422.974	598.927	567.354	484.482	0.853932	0.538089	-
GSPT1	A0A8I3NL42	G1 to S phase transition 1	45	29	47	29	29	729.2	729.438	706.218	654.911	615.902	597.607	721.619	622.807	0.863069	0.0154692	-
USO1	A0A8I3Q5G1	General vesicular transport factor p115	50	41	57	41	41	565.3	570.5	560.269	468.773	449.366	596.288	565.356	504.809	0.892904	0.319193	-
OSCP1	A0A8I3Q7Q9	Organic solute carrier partner 1	39	12	14	12	12	120.1	108.381	120.408	121.969	99.0749	594.705	116.296	271.916	2.33813	0.437002	-
RAB1A	P62822	Ras-related protein Rab-1A	80	15	33	7	15	890.2	684.569	642.68	589.599	544.912	593.122	739.15	575.878	0.779109	0.161778	-
PSMD11	A0A8I3NN65	Proteasome 26S subunit, non-ATPase 11	62	24	51	14	24	826.9	793.897	770.008	836.64	738.405	592.726	796.935	722.59	0.906712	0.405208	-
MARS1	A0A8I3NFF8	Methionine--tRNA ligase, cytoplasmic	42	31	38	31	31	712.7	440.475	372.296	404.441	415.917	592.726	508.49	471.028	0.926327	0.774932	-
MYL12A	A0A8I3MGU1	Myosin light chain 12A	71	13	64	13	13	459.9	682.989	459.363	669.769	523.601	589.692	534.084	594.354	1.11285	0.529679	-
MYL12B	A0A8I3RR31	Myosin light chain 12B	71	13	64	13	13	459.9	682.989	459.363	669.769	523.601	589.692	534.084	594.354	1.11285	0.529679	-
LOC100683203	A0A8I3PXD8	Uncharacterized protein	32	7	12	3	7	567	596.727	528.437	595.151	423.679	589.164	564.054	535.998	0.95026	0.675766	-
PSAP	A0A8I3MQM8	Prosaposin	68	28	89	28	28	702.3	984.907	772.273	801.372	634.531	588.9	819.827	674.935	0.823265	0.250874	-
GOT1	A0A8I3QCW7	Aspartate aminotransferase	61	25	43	25	25	798.5	872.102	850.783	724.631	745.744	587.054	840.462	685.809	0.815991	0.0725241	-
FMO2	A0A8I3RPX2	Flavin-containing monooxygenase	46	29	53	29	29	1574.3	725.014	545.171	542.085	489.871	586.526	948.162	539.494	0.568989	0.326471	-
NSF	A0A8I3PN27	Vesicle-fusing ATPase	44	34	49	34	34	576.2	498.141	511.451	546.331	494.105	585.075	528.597	541.837	1.02505	0.729845	-
AHSP	A0A8I3NEE3	Alpha-hemoglobin-stabilizing protein	9	1	1	1	1	53.9	50.8726	42.7782	77.7207	58.7111	584.679	49.1836	240.37	4.8872	0.382582	-
AP2A1	A0A8I3S2R3	AP-2 complex subunit alpha	43	36	49	25	36	448.9	774.781	614.371	656.544	589.087	583.36	612.684	609.663	0.99507	0.977698	-
KYAT1	A0A8I3PWB4	Kynurenine aminotransferase 1	35	16	51	15	16	1240.8	855.197	649.977	1226.06	671.226	583.096	915.325	826.794	0.903279	0.7559	-
HADHB	A0A8I3Q2S8	Hydroxyacyl-CoA dehydrogenase trifunctional multienzyme complex subunit beta	55	25	45	25	25	677.2	273.164	923.129	340.763	426.502	582.568	624.498	449.944	0.72049	0.461683	-
ACADM	A0A8I3RRX0	Medium-chain specific acyl-CoA dehydrogenase, mitochondrial	45	21	35	21	21	740.9	490.874	952.445	522.655	571.304	582.304	728.073	558.754	0.767443	0.331582	-
GCLC	A0A8I3NES9	Glutamate--cysteine ligase	53	28	44	28	28	526.2	636.066	573.228	547.637	481.261	581.909	578.498	536.936	0.928155	0.392977	-
MYO1D	F1PRN2	Unconventional myosin-Id	37	34	44	33	34	642.6	656.447	563.414	745.694	376.259	580.589	620.82	567.514	0.914136	0.672256	-
NANS	A0A8I3N2X1	N-acetylneuraminate synthase	42	18	50	18	18	635.7	973.216	748.116	690.832	527.271	579.534	785.677	599.212	0.76267	0.19288	-
EML4	A0A8I3PWD3	EMAP like 4	36	33	42	2	33	599.4	552.963	513.087	554.821	459.668	578.347	555.15	530.945	0.9564	0.615238	-
LOC119866566	A0A8I3PHC9	RRM domain-containing protein	46	17	37	15	17	668.2	238.406	251.385	377.99	298.918	577.423	385.997	418.111	1.0832	0.856148	-
ARSF	A0A8I3S3Z3	Arylsulfatase F	44	20	42	20	20	373.8	331.146	217.037	383.705	413.377	576.764	307.328	457.948	1.4901	0.123128	-
EIF3D	A0A8I3NBD4	Eukaryotic translation initiation factor 3 subunit D	49	21	33	21	21	730.7	373.961	454.456	285.085	216.497	576.104	519.706	359.229	0.691215	0.357185	-
LOC119868770	A0A8I3PP58	E1 ubiquitin-activating enzyme	22	19	41	19	19	681.7	726.752	731.382	654.584	684.492	574.521	713.278	637.866	0.894274	0.134046	-
LOC119868744	A0A8I3P3T2	E1 ubiquitin-activating enzyme	20	18	39	18	18	681.7	726.752	731.382	654.584	684.492	574.521	713.278	637.866	0.894274	0.134046	-
PARK7	A0A8I3Q111	protein deglycase	80	14	31	14	14	633.9	517.258	571.215	501.102	522.049	574.521	574.124	532.557	0.927599	0.368062	-
SSB	A0A8I3PZQ3	Small RNA binding exonuclease protection factor La	54	26	38	26	26	570.1	575.082	551.713	568.7	513.722	566.21	565.632	549.544	0.971558	0.473453	-
RPS6KA1	A0A8I3NMQ4	Ribosomal protein S6 kinase	40	28	44	20	28	632.2	862.465	636.766	678.26	593.744	566.078	710.477	612.694	0.86237	0.331081	-
ACO1	A0A8I3S0Z7	Aconitase 1	33	30	48	30	30	472.9	652.339	428.034	503.552	470.253	564.363	517.758	512.723	0.990275	0.950492	-
spink5	Q4VYB4	Serine peptidase inhibitor Kazal type 5	42	41	65	41	41	650.5	921.237	865.252	1008.57	1819.48	563.44	812.33	1130.5	1.39167	0.480275	-
IST1	A0A8I3N3H0	IST1 homolog	34	12	23	12	12	526.3	639.226	575.87	572.292	537.573	562.12	580.465	557.328	0.960141	0.558918	-
PSPC1	A0A8I3PJU5	Paraspeckle component 1	35	15	18	14	15	757.6	470.809	470.938	596.62	465.172	559.086	566.449	540.293	0.953825	0.818384	-
ISYNA1	A0A8I3PC70	Inositol-3-phosphate synthase 1	16	9	11	9	9	276.2	305.078	326.624	331.619	304.987	558.558	302.634	398.388	1.3164	0.355824	-
QTRT1	A0A8I3PIY5	dynamin GTPase	41	35	60	3	35	793.9	666.084	533.47	550.413	493.258	558.031	664.485	533.9	0.80348	0.219538	-
SERPINB6	A0A8I3P230	Uncharacterized protein	63	19	36	19	19	438.1	1285.72	531.331	800.392	454.587	557.767	751.717	604.249	0.803825	0.648496	-
CSE1L	A0A8I3PFQ8	Exportin-2	35	33	49	33	33	680.3	650.601	541.019	576.537	553.945	557.503	623.973	562.662	0.90174	0.283349	-
SPTBN2	A0A8I3RWW8	Spectrin beta chain	38	77	93	65	77	722.3	829.287	688.981	887.257	669.25	556.843	746.856	704.45	0.94322	0.717848	-
CTSB	A0A8I3P7H9	Cathepsin B	45	14	42	14	14	637	529.423	571.341	452.282	467.289	555.26	579.255	491.611	0.848695	0.122427	-
CFI	A0A8I3Q318	Complement factor I	36	18	26	2	18	234.5	364.956	474.335	486.897	463.338	554.865	357.93	501.7	1.40167	0.162927	-
SAMHD1	A0A8I3PR83	Deoxynucleoside triphosphate triphosphohydrolase SAMHD1	59	30	48	30	30	861.4	1184.45	665.705	1218.71	573.703	549.192	903.851	780.536	0.863567	0.67026	-
DHX9	A0A8I3RTG4	RNA helicase	37	41	54	41	41	458.6	494.507	477.48	557.107	411.965	544.047	476.863	504.373	1.05769	0.616319	-
GCN1	A0A8I3SCB6	GCN1 activator of EIF2AK4	22	53	57	53	53	516.6	492.453	532.84	573.925	506.948	543.783	513.965	541.552	1.05368	0.303116	-
S100P	A0A8I3N3T0	S100 calcium binding protein P	62	9	30	9	9	1421.1	980.957	645.951	656.054	795.14	542.596	1016	664.597	0.654129	0.253868	-
A1BG	A0A8I3MWS0	Alpha-1-B glycoprotein	40	15	34	15	15	206.6	249.781	268.748	205.078	288.616	542.332	241.71	345.342	1.42875	0.414879	-
S100A2	A0A8I3MJM1	Protein S100	31	7	39	7	7	490.1	690.888	632.992	1357.17	2195.03	542.068	604.66	1364.76	2.25707	0.251063	-
ITIH1	A0A8I3Q1W7	Inter-alpha-trypsin inhibitor heavy chain 1	16	12	12	12	12	167.7	214.866	219.93	222.875	353.113	541.936	200.832	372.642	1.85549	0.201718	-
HSPH1	A0A8I3PBN0	Heat shock protein 105 kDa	45	31	42	28	31	190.3	291.649	209.865	258.47	248.393	541.409	230.605	349.424	1.51525	0.342089	-
CAPZB	A0A8I3MHS5	F-actin-capping protein subunit beta	64	21	44	21	21	600.4	752.978	666.082	850.845	698.464	541.277	673.153	696.862	1.03522	0.82772	-
PRMT1	A0A8I3PS34	Protein arginine methyltransferase 1	43	15	30	15	15	496.5	709.531	564.043	592.375	486.907	540.485	590.025	539.922	0.915084	0.526756	-
EPS8L2	A0A8I3P9Z5	EPS8 like 2	41	29	42	29	29	524.4	731.808	448.416	491.469	535.597	539.298	568.208	522.121	0.918891	0.642985	-
ANK3	A0A8I3MNX1	Ankyrin 3	36	53	60	48	53	613.4	487.082	408.28	515.797	356.218	539.298	502.921	470.438	0.935411	0.715267	-
TPR	A0A8I3MZ55	Nucleoprotein TPR	24	56	59	56	56	948.3	617.423	557.249	549.106	469.971	538.374	707.657	519.15	0.733618	0.258742	-
RPS3A	A0A8I3MUG5	Small ribosomal subunit protein eS1	63	19	35	18	19	408.5	527.211	487.546	423.872	451.765	537.715	474.419	471.117	0.99304	0.949404	-
UNC45A	A0A8I3MH41	Unc-45 myosin chaperone A	39	38	50	38	38	443.9	555.333	440.238	603.152	635.801	536.659	479.824	591.871	1.23352	0.082868	-
XPNPEP1	A0A8I3PVS7	X-prolyl aminopeptidase 1	60	33	60	33	33	693.8	837.819	763.843	755.98	692.537	535.076	765.154	661.198	0.864137	0.263908	-
CUL3	A0A8I3NYQ0	Cullin 3	44	34	47	34	34	665.7	646.177	586.942	650.502	556.626	535.076	632.94	580.735	0.91752	0.296798	-
OSBPL3	A0A8I3NRJ1	Oxysterol-binding protein	40	27	32	25	27	503	340.151	304.48	242.959	201.537	530.063	382.544	324.853	0.849191	0.661288	-
HNRNPA1	A0A8I3P1F5	Heterogeneous nuclear ribonucleoprotein A1	50	18	59	13	18	815.3	339.52	299.951	343.702	336.46	528.612	484.923	402.924	0.830903	0.679788	-
ALDH5A1	A0A8I3P3Q3	Succinate-semialdehyde dehydrogenase	35	17	23	17	17	320.8	162.887	294.666	265.654	159.621	528.612	259.451	317.962	1.22552	0.662064	-
GSTP1	A0A8I3NBB4	Glutathione S-transferase	57	10	83	7	10	854.5	1258.7	1143.44	1057.39	868.529	528.348	1085.55	818.09	0.75362	0.248153	-
KHSRP	A0A8I3RYC9	KH-type splicing regulatory protein	32	24	30	19	24	684.5	335.728	273.781	318.067	300.471	527.293	431.336	381.944	0.885489	0.758077	-
TPT1	A0A8I3N0W8	Uncharacterized protein	62	11	47	11	11	563.6	889.323	711.88	802.025	971.697	526.633	721.601	766.785	1.06262	0.793238	-
PSMD3	A0A8I3NH42	Proteasome 26S subunit, non-ATPase 3	58	31	55	31	31	660	712.059	754.658	905.544	720.481	526.501	708.906	717.509	1.01214	0.945458	-
HNRNPUL2	A0A8I3N8E9	Heterogeneous nuclear ribonucleoprotein U like 2	44	32	57	32	32	564.3	518.206	509.312	545.024	438.075	524.786	530.606	502.629	0.947273	0.504029	-
SNX6	A0A8I3MPY5	Sorting nexin	39	19	25	19	19	555	727.858	490.062	514.001	513.157	524.127	590.973	517.095	0.874989	0.407176	-
PTGDS	Q9XS65	Prostaglandin-H2 D-isomerase	19	3	8	3	3	109.3	142.033	150.227	139.277	150.306	523.335	133.853	270.973	2.0244	0.390836	-
ARHGDIA	A0A8I3RWM1	Rho GDP dissociation inhibitor alpha	38	12	43	12	12	647.2	515.52	678.286	578.986	654.854	522.148	613.669	585.33	0.95382	0.677469	-
PSMD2	A0A8I3S6C6	26S proteasome non-ATPase regulatory subunit 2	59	34	74	34	34	653.1	673.667	743.712	702.915	608.986	522.148	690.16	611.35	0.885809	0.272961	-
TRIM28	A0A8I3MA67	Tripartite motif containing 28	29	21	32	21	21	645.5	382.493	404.506	333.252	277.466	521.092	477.5	377.27	0.790096	0.421967	-
KARS1	A0A8I3S6W4	Lysine--tRNA ligase	42	26	39	26	26	627	574.292	579.016	448.69	486.766	520.697	593.436	485.384	0.817922	0.0170063	-
LOC481043	A0A8I3Q5Q9	Hydroxyacyl-CoA dehydrogenase trifunctional multienzyme complex subunit beta	43	19	36	19	19	515.8	253.889	722.574	326.231	337.448	519.773	497.421	394.484	0.793058	0.543273	-
HNRNPD	A0A8I3P7D1	Heterogeneous nuclear ribonucleoprotein D	48	16	28	3	16	807.6	558.335	312.407	564.455	519.791	519.246	559.447	534.497	0.955402	0.877864	-
PRKAR1A	A0A8I3Q3C0	Protein kinase cAMP-dependent type I regulatory subunit alpha	51	18	28	18	18	378.5	330.514	510.822	360.03	420.857	519.114	406.612	433.333	1.06572	0.726524	-
VARS1	A0A8I3NMY0	Valine--tRNA ligase	32	36	49	36	36	474.8	451.692	431.305	508.94	483.237	518.718	452.599	503.632	1.11275	0.0373961	-
PA2G4	A0A8I3MYE2	Proliferation-associated 2G4	60	24	38	23	24	470.8	517.89	470.309	577.68	592.897	518.586	486.333	563.054	1.15776	0.0567339	-
DIAPH1	A0A8I3NYB0	Diaphanous related formin 1	32	36	42	36	36	522.9	697.366	514.723	591.559	525.154	518.586	578.33	545.099	0.942541	0.644353	-
AHSG	A0A8I3PIK8	Alpha-2-HS-glycoprotein	38	10	32	10	10	186.4	251.519	231.883	209.16	400.957	518.322	223.267	376.146	1.68473	0.228487	-
GARS1	A0A8I3S467	Glycine--tRNA ligase	46	29	47	29	29	603.9	592.935	635.382	546.82	655.419	518.19	610.739	573.476	0.938988	0.471255	-
ESD	A0A8I3MU76	S-formylglutathione hydrolase	74	16	36	16	16	578.2	487.398	549.952	477.754	520.214	518.19	538.517	505.386	0.938478	0.352735	-
PAICS	A0A8I3RXP6	Uncharacterized protein	58	26	56	26	26	734.6	751.082	644.19	733.775	735.864	517.926	709.957	662.522	0.933185	0.595679	-
SORD	A0A8I3QI05	Sorbitol dehydrogenase	72	19	40	19	19	601.8	572.08	516.358	386.971	386.138	517.794	563.413	430.301	0.76374	0.0729263	-
STAT1	A0A8I3PX00	Signal transducer and activator of transcription	49	34	66	34	34	869.1	648.073	786.113	517.267	527.271	517.663	767.762	520.733	0.678248	0.0614869	-
PAK2	A0A8I3Q5W6	P21 (RAC1) activated kinase 2	60	26	44	21	26	593.9	751.082	629.343	467.14	563.259	516.343	658.108	515.581	0.783429	0.075702	-
CETN2	A0A8I3PMD5	Uncharacterized protein	48	5	6	5	5	167.5	172.999	126.447	206.874	144.943	515.816	155.649	289.211	1.8581	0.364217	-
PRPF8	A0A8I3P2M1	Pre-mRNA processing factor 8	28	56	64	56	56	522.9	472.073	495.347	531.309	340.976	513.441	496.773	461.909	0.929818	0.627524	-
NAXE	E2QRY6	NAD(P)H-hydrate epimerase	51	12	27	12	12	651.4	830.709	782.841	726.59	738.264	511.726	754.983	658.86	0.872681	0.355994	-
CAPG	A0A8I3NQW0	Capping actin protein, gelsolin like	55	14	66	14	14	652.1	919.657	805.489	1198.79	1471.45	510.275	792.415	1060.17	1.3379	0.450907	-
MAP4	A0A8I3N3Q1	Microtubule-associated protein	17	31	44	31	31	437	389.128	269.251	454.568	379.082	509.615	365.126	447.755	1.2263	0.262139	-
IVL	A0A8I3PYV9	Involucrin	79	25	94	24	25	655.8	711.901	934.327	1093.64	3291.77	509.483	767.343	1631.63	2.12634	0.415006	-
DNM1L	A0A8I3NY63	Uncharacterized protein	58	36	46	36	36	517.8	521.366	451.562	451.792	479.003	509.483	496.909	480.093	0.966158	0.585226	-
LOC607844	A0A8I3S4D4	Small ribosomal subunit protein eS1	33	10	21	10	10	330.3	441.897	399.725	356.274	338.294	508.692	390.64	401.087	1.02674	0.878171	-
DLD	A0A8I3PTV9	Dihydrolipoyl dehydrogenase	42	18	34	18	18	400.6	229.085	524.411	368.847	379.364	507.768	384.699	418.66	1.08828	0.748238	-
PSMD12	A0A8I3PZT2	Proteasome 26S subunit, non-ATPase 12	60	28	57	28	28	585.7	740.023	707.476	793.208	830.705	507.373	677.733	710.429	1.04824	0.791251	-
HDGF	A0A8I3RUF1	PWWP domain-containing protein	59	15	42	13	15	676.2	494.823	621.417	469.1	504.407	507.241	597.48	493.583	0.826107	0.187851	-
DARS1	A0A8I3NDI5	Aspartate--tRNA ligase, cytoplasmic	64	27	42	27	27	505	393.394	437.596	361.499	404.768	506.317	445.33	424.195	0.95254	0.715899	-
CAT	O97492	Catalase	57	27	46	27	27	570.7	751.398	570.083	582.905	713.707	505.658	630.727	600.756	0.952482	0.743901	-
RPS11	A0A8I3PL85	Small ribosomal subunit protein uS17	50	9	10	9	9	340.7	581.244	575.367	434.975	434.688	503.811	499.104	457.824	0.917293	0.660035	-
HNRNPM	A0A8I3MV65	Heterogeneous nuclear ribonucleoprotein M	47	35	53	35	35	1197.2	709.215	620.158	611.479	523.178	502.887	842.191	545.848	0.648128	0.237779	-
MACF1	A0A8I3Q298	Microtubule actin crosslinking factor 1	11	74	78	72	74	463	534.637	505.664	572.455	764.232	502.36	501.1	613.016	1.22334	0.286754	-
ATP6V1E1	A0A8I3QBE3	Uncharacterized protein	48	16	40	16	16	779.8	735.599	693.259	555.148	582.877	502.36	736.219	546.795	0.742706	0.0053427	-
LUM	A0A8I3P684	Lumican	29	8	10	8	8	134.8	176.474	102.542	125.071	233.01	502.36	137.939	286.814	2.07928	0.314698	-
GART	A0A8I3PRU8	Trifunctional purine biosynthetic protein adenosine-3	49	41	59	41	41	660.5	716.483	629.595	660.299	733.183	502.096	668.859	631.859	0.944682	0.651966	-
SRI	A0A8I3RY81	Sorcin	63	10	17	10	10	540.5	245.832	175.391	245.571	182.202	499.062	320.574	308.945	0.963724	0.94118	-
ACAT1	A0A8I3RSY6	Acetyl-CoA acetyltransferase 1	57	22	57	22	22	925.6	347.419	922.877	386.807	480.556	498.402	731.965	455.255	0.621962	0.28525	-
HARS1	A0A8I3MNZ5	Histidine--tRNA ligase, cytoplasmic	42	22	29	18	22	517.1	584.719	576.248	623.398	713.283	497.742	559.356	611.475	1.09318	0.498921	-
CAD	A0A8I3NEV0	CAD protein	30	49	58	49	49	607.7	688.992	612.106	633.521	670.097	495.895	636.266	599.838	0.942747	0.582993	-
USP14	A0A8I3MZA5	Ubiquitin carboxyl-terminal hydrolase	54	26	50	26	26	561.6	483.922	543.661	530.819	479.427	494.444	529.728	501.563	0.946833	0.380049	-
DDX39A	A0A8I3PGD1	DExD-box helicase 39A	49	20	36	7	20	518.4	404.927	387.269	491.142	387.408	493.257	436.865	457.269	1.04671	0.724872	-
NAMPT	A0A8I3PRF4	Nicotinamide phosphoribosyltransferase	60	27	39	27	27	663.9	629.43	624.814	438.403	514.004	492.993	639.381	481.8	0.753541	0.00791286	-
GNG5	A0A8I3RRM1	Guanine nucleotide-binding protein subunit gamma	13	1	1	1	1	231.6	191.641	194.012	311.536	206.477	492.861	205.751	336.958	1.6377	0.255687	-
NCKAP1	A0A8I3NZ88	NCK associated protein 1	25	29	39	29	29	511.1	683.779	469.428	518.9	391.36	491.806	554.769	467.355	0.842432	0.328931	-
ALDH2	A0A8I3S157	Aldehyde dehydrogenase domain-containing protein	46	20	60	16	20	545.3	472.705	854.055	522.329	421.845	491.278	624.02	478.484	0.766777	0.338811	-
CORO1C	A0A8I3PZZ4	Coronin	34	18	29	18	18	382.6	711.111	426.524	659.646	502.996	490.75	506.745	551.131	1.08759	0.728187	-
LOC119868890	A0A8I3PUZ9	Dynamin-1-like protein	51	34	43	34	34	517.8	521.366	437.722	451.792	377.388	490.487	492.296	439.889	0.893546	0.291964	-
ARFIP1	A0A8I3N742	ADP ribosylation factor interacting protein 1	36	16	23	16	16	561	523.419	452.191	456.037	360.593	489.827	512.203	435.486	0.850221	0.203377	-
ROCK2	A0A8I3QE63	Rho-associated protein kinase	31	42	45	39	42	598.1	481.078	318.32	515.144	360.17	489.827	465.833	455.047	0.976846	0.915614	-
ECPAS	A0A8I3NBG7	Ecm29 proteasome adaptor and scaffold	35	48	58	48	48	609.7	582.033	545.171	631.072	629.733	488.244	578.968	583.016	1.00699	0.942355	-
F2	A0A8I3PUT1	Prothrombin	41	21	26	21	21	141.8	190.693	188.35	207.527	264.482	487.98	173.614	319.996	1.84314	0.226593	-
EIF3B	A0A8I3RTH2	Eukaryotic translation initiation factor 3 subunit B	32	25	33	25	25	561.8	600.834	500.128	472.529	407.731	487.452	554.254	455.904	0.822555	0.0635497	-
CCAR2	A0A8I3P633	Cell cycle and apoptosis regulator 2	34	25	34	25	25	602.8	380.439	413.439	351.376	274.644	486.265	465.559	370.761	0.796379	0.365779	-
ATP6V1C1	A0A8I3NAS2	V-type proton ATPase subunit C	51	21	29	20	21	600.7	651.391	519.881	524.778	514.851	485.342	590.657	508.323	0.860606	0.15565	-
GDI1	A0A8I3SBX3	Rab GDP dissociation inhibitor	70	29	69	19	29	383	512.044	490.566	531.962	557.05	483.495	461.87	524.169	1.13488	0.261315	-
HBQ1	A0A8I3RPI6	Globin family profile domain-containing protein	69	8	208	1	8	24.9	32.0719	30.8255	34.1253	23.9925	483.231	29.2658	180.45	6.16589	0.423251	-
HPRT1	A0A8I3PNY2	Hypoxanthine phosphoribosyltransferase	81	13	40	13	13	247.4	289.437	294.792	275.941	339.706	482.175	277.21	365.941	1.32009	0.280455	-
PSME2	A0A8I3MUE2	Proteasome activator subunit 2	63	14	53	14	14	770.9	687.571	562.534	623.398	560.154	481.648	673.668	555.067	0.823947	0.189843	-
NAA15	A0A8I3PFD0	N-alpha-acetyltransferase 15, NatA auxiliary subunit	31	23	30	18	23	382.9	524.367	433.444	516.614	440.756	481.516	446.904	479.629	1.07323	0.534405	-
TKFC	F1Q0K5	Triokinase/FMN cyclase	58	25	54	25	25	559.1	975.427	812.157	703.405	526.988	480.592	782.228	570.328	0.729108	0.220303	-
CLIC1	A0A8I3NMK5	Chloride intracellular channel protein	62	12	36	12	12	463.2	536.848	404.003	392.195	404.485	480.197	468.017	425.626	0.909424	0.425313	-
GPX2	A0A8I3MGB9	Glutathione peroxidase	81	17	82	17	17	811.1	976.059	978.111	707.977	724.291	478.745	921.757	637.004	0.691076	0.0484581	-
HADH	A0A8I3Q031	Hydroxyacyl-CoA dehydrogenase	48	15	25	15	15	416.9	221.817	402.619	236.428	238.796	478.745	347.112	317.99	0.916101	0.790202	-
GLUD1	A0A8I3N1X6	glutamate dehydrogenase [NAD(P)(+)]	49	25	38	25	25	365.1	389.76	471.693	411.136	367.226	478.35	408.851	418.904	1.02459	0.836412	-
MSN	A0A8I3PWU6	Uncharacterized protein	50	36	78	23	36	299.7	384.389	296.302	532.125	499.891	478.218	326.797	503.411	1.54044	0.0116478	UP
KRT7	A0A8I3PV96	IF rod domain-containing protein	46	29	68	19	29	510.7	422.306	420.736	309.25	288.475	476.371	451.247	358.032	0.793427	0.257196	-
ALDH6A1	A0A8I3NRV2	Aldehyde dehydrogenase 6 family member A1	53	24	33	24	24	710.7	224.819	682.816	345.008	331.802	475.975	539.445	384.262	0.712328	0.431462	-
LOC119867101	A0A8I3PFJ8	ATP synthase subunit alpha	23	11	31	11	11	539.9	179.16	661.553	276.594	293.838	475.579	460.204	348.67	0.757643	0.535933	-
MYO5B	A0A8I3NVA6	Myosin VB	24	40	42	37	40	470.6	498.615	514.597	545.841	539.973	474.128	494.604	519.98	1.05131	0.403529	-
HAGH	A0A8I3P4S7	Hydroxyacylglutathione hydrolase	48	10	17	10	10	278.9	337.782	285.104	239.04	302.023	473.996	300.595	338.353	1.12561	0.649374	-
MYH10	A0A8I3MBM8	Myosin heavy chain 10	30	58	96	30	58	171.7	187.692	147.207	205.241	146.213	473.337	168.866	274.93	1.62809	0.402624	-
H1-3	A0A8I3PXE6	H1.3 linker histone, cluster member	35	11	24	2	11	176.4	123.548	147.082	129.807	131.112	473.073	149.01	244.664	1.64193	0.491144	-
MYO5C	A0A8I3Q1Y1	Myosin VC	21	36	38	34	36	346.3	362.744	293.408	341.416	238.655	470.962	334.151	350.344	1.04846	0.836322	-
EIF2S3	A0A8I3Q3Z7	protein-synthesizing GTPase	32	19	24	4	19	259.7	386.6	221.44	527.717	461.221	470.566	289.247	486.501	1.68196	0.0429362	UP
ARPC2	A0A8I3PPW3	Arp2/3 complex 34 kDa subunit	56	20	51	20	20	487.3	522.313	544.164	524.615	467.854	470.434	517.926	487.634	0.941514	0.290307	-
GSR	A0A8I3P561	Glutathione reductase	54	22	46	22	22	518.1	747.291	592.73	556.127	603.341	469.643	619.374	543.037	0.876752	0.395744	-
LOC119881735	A0A8I3N3V5	phenylalanine--tRNA ligase	38	21	24	20	21	602.9	464.647	490.44	454.078	403.639	469.379	519.329	442.365	0.851802	0.204269	-
NIBAN1	A0A8I3MWA2	Niban apoptosis regulator 1	39	30	38	30	30	579.1	422.306	383.62	339.456	237.102	468.192	461.675	348.25	0.754318	0.275383	-
YARS1	A0A8I3MP16	Tyrosine--tRNA ligase	67	33	41	33	33	444.5	633.538	495.095	588.293	674.048	465.949	524.378	576.097	1.09863	0.565742	-
OSBP	A0A8I3NS93	Oxysterol-binding protein	36	26	34	25	26	369.7	480.92	353.172	385.664	329.685	465.421	401.264	393.59	0.980876	0.898017	-
LRPPRC	A0A8I3S5Q5	Leucine rich pentatricopeptide repeat containing	24	31	33	31	31	375.4	224.819	413.942	283.452	275.773	464.63	338.054	341.285	1.00956	0.971334	-
H1-10	A0A8I3P7C3	H15 domain-containing protein	23	6	8	6	6	235.8	58.7721	105.31	107.927	144.237	464.63	133.294	238.931	1.79251	0.463759	-
PSMC5	A0A8I3S1Z6	Proteasome 26S subunit, ATPase 5	58	24	55	23	24	608.4	519.312	590.214	493.918	413.518	464.498	572.642	457.311	0.798599	0.0335414	-
AGT	A0A8I3RR88	Angiotensinogen	28	12	14	12	12	71.9	99.8494	142.049	136.174	177.968	464.102	104.599	259.415	2.48008	0.269821	-
CYP2F1	A0A8I3MMW2	Uncharacterized protein	45	24	66	24	24	1007	524.841	692.126	627.48	450.918	463.838	741.323	514.079	0.693462	0.244767	-
ANXA4	A0A8I3QBP0	Annexin	71	23	40	23	23	598.5	557.387	607.325	765.94	456.987	463.047	587.737	561.991	0.956195	0.825281	-
CKM	P05123	Creatine kinase M-type	2	1	5	1	1	268.4	440.633	270.384	291.779	292.567	462.915	326.472	349.087	1.06927	0.792966	-
LPO	A0A8I3P5G5	Lactoperoxidase	50	28	42	28	28	304.6	618.845	427.656	377.827	268.998	462.519	450.367	369.781	0.821067	0.502066	-
HMGB1	Q6YKA4	High mobility group protein B1	45	13	31	11	13	552.4	174.736	191.244	268.104	257.425	462.123	306.127	329.217	1.07543	0.87928	-
EFL1	A0A8I3MQY4	Elongation factor like GTPase 1	25	26	29	2	26	248.7	206.966	200.68	256.511	238.655	461.991	218.782	319.052	1.45831	0.295033	-
TNPO1	A0A8I3MVJ2	Transportin 1	32	23	31	17	23	480	435.261	398.718	360.193	308.798	461.596	437.993	376.862	0.860429	0.313593	-
VIM	A0A8I3NU02	Vimentin	68	32	50	28	32	714.1	587.089	528.563	565.434	654.29	461.464	609.917	560.396	0.918806	0.560619	-
LRRFIP1	A0A8I3Q5Y9	Uncharacterized protein	37	31	42	1	31	384.3	585.351	472.07	691.322	505.96	460.54	480.574	552.607	1.14989	0.476576	-
LOC119868757	A0A8I3PQH0	RNA helicase	44	24	40	23	24	444.5	390.234	390.288	446.241	408.155	458.693	408.341	437.696	1.07189	0.283681	-
DDX3X	A0A8I3PPD5	RNA helicase	44	24	40	23	24	444.5	390.234	390.288	446.241	408.155	458.693	408.341	437.696	1.07189	0.283681	-
ZSCAN18	A0A8I3MBR0	Zinc finger and SCAN domain containing 18	1	1	1	1	1	80.8	45.501	73.4779	514.491	218.05	458.561	66.593	397.034	5.9621	0.066166	-
RAB7A	P18067	Ras-related protein Rab-7a	63	11	19	11	11	681.5	635.118	577.254	589.11	632.555	458.298	631.291	559.988	0.887052	0.318369	-
PSMA6	A0A8I3N0P1	Proteasome subunit alpha type	60	15	47	15	15	796	704.001	696.782	657.687	657.677	457.902	732.261	591.088	0.80721	0.155932	-
NAPA	A0A8I3MLQ0	NSF attachment protein alpha	75	19	36	16	19	753.5	746.185	553.978	599.559	598.825	457.902	684.554	552.095	0.806503	0.18241	-
C5	A0A8I3NVC1	Complement C5	22	33	35	33	33	195.5	337.15	267.993	388.93	315.007	457.638	266.881	387.192	1.4508	0.106874	-
UPF1	A0A8I3S463	UPF1 RNA helicase and ATPase	42	34	44	34	34	486.3	457.222	442.377	473.345	441.462	457.374	461.966	457.394	0.990102	0.78869	-
PUF60	A0A8I3NC96	Poly(U)-binding-splicing factor PUF60	37	17	27	17	17	463.9	436.525	451.688	371.786	351.279	457.242	450.704	393.435	0.872935	0.215117	-
PYGL	A0A8I3N518	Alpha-1,4 glucan phosphorylase	48	42	95	35	42	843.1	1244.33	1016.49	1342.97	1000.77	456.846	1034.64	933.528	0.902276	0.746234	-
SARS1	A0A8I3MPG2	serine--tRNA ligase	62	28	44	28	28	549	316.927	381.984	395.461	398.981	455.791	415.97	416.744	1.00186	0.99226	-
CORO1A	A0A8I3RQE5	Coronin	46	20	32	20	20	644	499.721	464.018	287.371	358.194	455.791	535.913	367.119	0.685034	0.084356	-
DDX1	A0A8I3NTG3	ATP-dependent RNA helicase	45	28	37	28	28	387.4	340.467	267.49	336.844	278.031	455.791	331.786	356.889	1.07566	0.712848	-
RACK1	A0A8I3RSQ2	Small ribosomal subunit protein RACK1	63	17	39	17	17	447.7	526.895	358.582	476.121	450.777	454.472	444.392	460.456	1.03615	0.773896	-
DMTN	A0A8I3S6B9	Dematin actin binding protein	5	2	2	2	2	99.2	140.927	105.436	205.731	217.344	454.34	115.187	292.472	2.53909	0.157001	-
CD3E	A0A8I3MN93	T-cell surface glycoprotein CD3 epsilon chain	4	1	3	1	1	71	159.253	102.668	167.361	166.818	454.34	110.974	262.84	2.36849	0.249882	-
MYO1B	A0A8I3S1I2	Myosin IB	32	30	33	29	30	381.3	349.473	334.425	335.374	267.164	454.208	355.066	352.249	0.992065	0.964221	-
FH	A0A8I3MXC4	Fumarate hydratase, mitochondrial	55	19	44	19	19	570.1	368.274	685.836	408.034	396.723	454.076	541.403	419.611	0.775043	0.318778	-
H1-2	A0A8I3PV53	H1.2 linker histone, cluster member	36	12	28	1	12	232.8	91.4759	193.886	126.051	152.141	453.153	172.721	243.781	1.41142	0.580115	-
ALCAM	A0A8I3PIH3	Activated leukocyte cell adhesion molecule	40	17	20	17	17	251.3	461.961	310.771	543.392	205.206	453.021	341.344	400.54	1.17342	0.649692	-
PSMA1	A0A8I3PCT4	Proteasome subunit alpha type	72	22	71	22	22	644.4	712.533	685.081	605.601	526	450.514	680.671	527.372	0.774782	0.0583838	-
CORO1B	A0A8I3N3J1	Coronin	49	19	35	19	19	656.9	707.951	645.322	489.836	397.852	450.382	670.058	446.024	0.665649	0.00338616	Down
MYL6	A0A8I3N3B7	Myosin light chain 6B	44	9	54	7	9	393.4	631.326	391.798	630.256	529.811	450.118	472.175	536.728	1.13672	0.540149	-
LOC106560188	A0A8I3NW58	Uncharacterized protein	21	7	24	1	7	699.9	326.722	523.53	356.111	434.97	449.986	516.717	413.689	0.80061	0.442707	-
HINT2	A0A8I3NC75	Histidine triad nucleotide binding protein 2	47	6	12	6	6	517.3	179.16	451.184	297.331	270.974	449.855	382.548	339.386	0.887173	0.737303	-
LOC100855538	A0A8I3NUZ5	40S ribosomal protein S24	18	2	7	2	2	153.6	179.634	541.522	228.59	170.065	448.14	291.585	282.265	0.968035	0.954167	-
LOC119881401	H9GWG6	40S ribosomal protein S24	20	2	7	2	2	153.6	179.634	541.522	228.59	170.065	448.14	291.585	282.265	0.968035	0.954167	-
NIT2	A0A8I3NV28	Nitrilase family member 2	57	17	27	17	17	492	554.543	525.92	403.952	344.928	447.216	524.155	398.698	0.76065	0.0310095	-
ILF2	A0A8I3MGS3	Interleukin enhancer binding factor 2	44	16	25	16	16	389.6	284.539	279.568	413.095	365.815	446.029	317.902	408.313	1.2844	0.113471	-
SF3B3	A0A8I3MQG0	Splicing factor 3b subunit 3	26	29	33	29	29	384.8	380.123	396.705	385.991	351.279	446.029	387.209	394.433	1.01866	0.819958	-
HNRNPF	A0A8I3PTS4	Heterogeneous nuclear ribonucleoprotein F	42	11	19	9	11	413.3	311.081	333.418	237.734	239.219	445.765	352.6	307.573	0.872299	0.597156	-
NUDC	A0A8I3N734	Nuclear migration protein nudC	58	22	32	22	22	276	276.956	267.993	257.491	295.39	445.501	273.65	332.794	1.21613	0.411188	-
IVD	A0A8I3QGH5	Isovaleryl-CoA dehydrogenase, mitochondrial	46	16	32	16	16	377.7	245.674	548.568	284.758	297.507	444.314	390.647	342.193	0.875964	0.663709	-
LOC479459	A0A8I3MGN3	Uncharacterized protein	31	11	71	7	11	443.8	648.231	495.598	586.824	621.688	444.182	529.21	550.898	1.04098	0.804507	-
CS	A0A8I3RVM2	Citrate synthase	45	19	41	19	19	499.4	311.713	630.098	478.243	595.438	444.182	480.404	505.954	1.05319	0.820689	-
PPT1	A0A8I3NFX3	Palmitoyl-protein thioesterase 1	31	9	15	9	9	558	541.43	495.472	362.152	316.419	443.654	531.634	374.075	0.703632	0.0333303	-
CPT2	A0A8I3NSG5	Carnitine palmitoyltransferase 2	40	24	31	24	24	508.8	302.076	721.82	499.796	415.07	441.807	510.899	452.225	0.885155	0.678814	-
PPP2CA	A0A8I3NN81	Serine/threonine-protein phosphatase	59	15	35	2	15	365	562.443	394.315	664.871	448.378	440.488	440.586	517.912	1.17551	0.466386	-
ATP6V1B2	A0A8I3Q2N9	Vacuolar proton pump subunit B	64	27	59	20	27	923.5	523.577	592.353	399.216	484.225	439.96	679.81	441.134	0.648908	0.189007	-
AP1G1	A0A8I3MWU6	AP-1 complex subunit gamma	36	24	34	24	24	443.2	449.006	361.728	424.035	307.245	439.301	417.978	390.194	0.933527	0.614166	-
CFAP298	A0A8I3PIL3	Cilia and flagella associated protein 298	20	5	5	5	5	125.9	100.007	101.41	116.744	119.257	438.905	109.106	224.969	2.06193	0.391962	-
SRSF6	A0A8I3NQA7	Serine and arginine rich splicing factor 6	24	9	11	8	9	407.1	169.365	236.664	195.118	167.383	438.377	271.043	266.959	0.984934	0.972584	-
RAC1	A0A8I3NH46	Rac family small GTPase 1	42	11	28	8	11	353.8	485.818	331.028	546.167	396.723	435.607	390.215	459.499	1.17755	0.352194	-
MT-III	J9PAA7	Metallothionein	16	1	1	1	1	44	37.6015	36.7389	38.2072	50.5254	435.343	39.4468	174.692	4.42854	0.408538	-
SUGT1	A0A8I3ND03	Uncharacterized protein	55	16	22	16	16	401.1	440.475	327.757	421.586	362.287	434.024	389.777	405.965	1.04153	0.707564	-
TTLL12	A0A8I3NI92	Tubulin tyrosine ligase like 12	45	27	54	27	27	579.1	523.103	490.691	588.13	497.068	431.913	530.965	505.704	0.952424	0.659534	-
AK1	B4YY02	Adenylate kinase isoenzyme 1	65	12	35	12	12	658.7	689.624	549.449	431.546	349.303	431.122	632.591	403.99	0.638627	0.015261	Down
CUL4B	A0A8I3PSQ6	Cullin 4B	27	28	35	20	28	425.4	493.085	412.81	427.3	425.232	430.33	443.765	427.621	0.96362	0.583814	-
EIF3K	A0A8I3RSI4	Eukaryotic translation initiation factor 3 subunit K	44	8	15	2	8	472.5	511.412	438.728	496.857	422.127	429.407	474.214	449.464	0.947808	0.479614	-
PACSIN2	A0A8I3NUA9	Protein kinase C and casein kinase substrate in neurons 2	44	20	26	17	20	425.1	633.538	374.939	535.717	339.706	429.275	477.859	434.899	0.9101	0.684066	-
KIF13B	A0A8I3PL23	Kinesin family member 13B	26	45	52	43	45	547.6	394.184	413.691	373.745	329.403	429.275	451.825	377.474	0.835444	0.27078	-
RPL35A	A0A8I3PWY9	Large ribosomal subunit protein eL33	48	7	12	7	7	765.5	831.499	547.058	353.172	321.923	429.011	714.686	368.035	0.514961	0.043093	Down
RPSA	A0A8I3NYW8	Small ribosomal subunit protein uS2	47	14	32	13	14	499.3	465.437	473.203	416.687	342.246	428.483	479.313	395.805	0.825776	0.0759268	-
CRYZ	A0A8I3MU73	Crystallin zeta	36	10	17	10	10	300.5	397.818	214.772	302.392	220.308	428.483	304.363	317.061	1.04172	0.882266	-
TXNRD1	A0A8I3NEP9	thioredoxin-disulfide reductase	42	23	42	23	23	451.5	625.165	626.827	412.115	401.522	428.219	567.83	413.952	0.729007	0.115645	-
SRSF12	A0A8I3N395	Serine and arginine rich splicing factor 12	4	1	2	1	1	268.7	157.99	178.159	180.26	202.525	428.087	201.616	270.291	1.34062	0.489234	-
DNAJC13	A0A8I3Q663	DnaJ heat shock protein family (Hsp40) member C13	27	52	59	52	52	435.5	495.771	420.862	490.816	407.449	427.164	450.711	441.81	0.98025	0.806686	-
ALDH4A1	A0A8I3RT19	Multifunctional fusion protein	51	22	33	22	22	655.8	233.825	538.376	350.559	357.629	426.9	476	378.363	0.79488	0.520643	-
SNRNP70	A0A8I3MF21	U1 small nuclear ribonucleoprotein 70 kDa	28	13	14	13	13	444.8	367.958	252.266	319.373	211.416	426.768	355.008	319.186	0.899095	0.690729	-
HNRNPAB	A0A8I3NPT9	Heterogeneous nuclear ribonucleoprotein A/B	31	13	24	11	13	385.3	478.076	313.036	493.102	442.873	426.636	392.137	454.204	1.15828	0.325868	-
LGALS1	A0A8I3N184	Galectin 1	53	6	9	6	6	276.6	168.733	118.521	96.8243	83.2681	426.504	187.951	202.199	1.07581	0.914919	-
SBSN	A0A8I3ML53	Suprabasin	73	22	120	12	22	425	568.446	745.348	1070.29	2422.68	423.206	579.598	1305.39	2.25224	0.342659	-
UBA6	A0A8I3N4B5	Ubiquitin like modifier activating enzyme 6	44	37	46	37	37	461.5	525.631	411.048	493.265	395.735	422.547	466.06	437.182	0.938039	0.548966	-
CHMP4B	A0A8I3PLN8	Charged multivesicular body protein 4B	37	10	15	10	10	437.3	440.475	292.528	270.063	282.265	422.283	390.101	324.87	0.832785	0.39821	-
SNTN	A0A8I3NF76	Sentan, cilia apical structure protein	7	1	1	1	1	24.8	17.5368	24.6604	72.0059	41.4929	422.019	22.3324	178.506	7.99313	0.329131	-
LOC100856533	A0A8I3PRI6	Enoyl reductase (ER) domain-containing protein	49	21	42	19	21	417.7	2039.65	692.63	772.798	314.584	421.623	1049.99	503.002	0.479053	0.390462	-
AGL	A0A8I3P0C9	Glycogen debranching enzyme	37	47	56	47	47	259.4	379.491	311.652	358.234	295.955	421.491	316.848	358.56	1.13165	0.452967	-
H1-5	A0A8I3P6L4	Uncharacterized protein	26	8	21	1	8	174.7	98.2695	121.037	92.9056	163.714	420.568	131.336	225.729	1.71872	0.444805	-
CTNNA1	A0A8I3PJB0	Catenin alpha 1	58	43	61	43	43	584.8	487.556	398.341	536.044	509.065	420.436	490.232	488.515	0.996497	0.980134	-
PABPC1L	A0A8I3NSK4	Poly(A) binding protein cytoplasmic 1 like	72	18	104	9	18	588.6	771.463	579.016	663.238	722.739	419.117	646.36	601.698	0.930903	0.713194	-
BCAP31	A0A8I3Q0S5	B-cell receptor-associated protein	50	16	34	16	16	929.2	385.81	452.82	446.731	436.805	418.193	589.277	433.91	0.736342	0.459673	-
CTH	A0A8I3NI74	Cystathionine gamma-lyase	36	18	34	18	18	461.2	374.593	555.991	655.727	681.528	417.534	463.928	584.93	1.26082	0.300655	-
PSMA3	A0A8I3P0V3	Proteasome subunit alpha type	47	16	41	16	16	627.3	632.906	656.897	553.678	524.307	416.742	639.034	498.242	0.77968	0.0712578	-
LOC119874467	A0A8I3RXC5	Ubiquitin-like domain-containing protein	30	17	34	10	17	988.7	361.954	898.091	324.598	230.046	416.742	749.582	323.795	0.431968	0.153721	-
GSS	A0A8I3NS50	Glutathione synthetase	54	22	41	22	22	443.5	719.642	515.855	541.432	454.87	414.763	559.666	470.355	0.840421	0.402544	-
PSMD6	A0A8I3NPX1	Proteasome 26S subunit, non-ATPase 6	50	24	39	24	24	497.9	624.849	579.016	563.801	468.842	414.499	567.255	482.381	0.850378	0.21431	-
USP7	A0A8I3NFM5	Ubiquitin carboxyl-terminal hydrolase 7	37	36	46	36	36	430.2	498.931	457.979	481.835	423.679	413.576	462.37	439.697	0.950964	0.480573	-
PRKAR2A	A0A8I3Q628	Protein kinase cAMP-dependent type II regulatory subunit alpha	61	19	27	16	19	356.4	346.155	362.608	304.678	255.026	412.521	355.054	324.075	0.912747	0.574337	-
LARS1	A0A8I3PF08	leucine--tRNA ligase	38	36	45	36	36	629.5	478.708	449.549	278.88	344.786	412.389	519.252	345.352	0.665094	0.0699159	-
JUP	A0A8I3NL10	Junction plakoglobin	62	38	75	34	38	738	487.398	836.063	867.99	1327.49	411.861	687.153	869.114	1.2648	0.573579	-
CTTN	A0A8I3NU47	Cortactin	25	18	25	18	18	628.5	487.872	523.907	701.935	406.602	411.597	546.76	506.712	0.926754	0.733893	-
LCNL1	A0A8I3MSE6	Lipocalin/cytosolic fatty-acid binding domain-containing protein	21	8	18	8	8	291.8	606.522	479.997	540.779	816.169	410.806	459.44	589.251	1.28254	0.44004	-
H2AC13	A0A8I3NYC7	Histone H2A	35	6	27	1	6	649.6	883.162	780.577	446.241	291.297	410.806	771.113	382.781	0.496401	0.0121079	Down
H2AC14	A0A8I3NUT4	Histone H2A	36	6	27	1	6	649.6	883.162	780.577	446.241	291.297	410.806	771.113	382.781	0.496401	0.0121079	Down
H2AC19	A0A8I3NGV0	Histone H2A	41	6	27	1	6	649.6	883.162	780.577	446.241	291.297	410.806	771.113	382.781	0.496401	0.0121079	Down
H2AJ	A0A8I3PGL5	Histone H2A	36	6	27	1	6	649.6	883.162	780.577	446.241	291.297	410.806	771.113	382.781	0.496401	0.0121079	Down
CRYAB	A0A8I3MR05	Alpha-crystallin A chain	57	9	22	9	9	535.3	625.639	350.027	659.319	481.544	410.674	503.655	517.179	1.02685	0.90794	-
UGGT1	A0A8I3P4P4	UDP-glucose glycoprotein glucosyltransferase 1	36	44	59	42	44	683.2	390.55	691.372	509.266	460.233	410.41	588.374	459.97	0.781764	0.323082	-
DDC	A0A8I3RY34	Dopa decarboxylase	16	7	10	7	7	80.6	72.5172	72.4713	86.5377	70.0017	410.278	75.1962	188.939	2.51262	0.41247	-
EIF3L	A0A8I3N087	Eukaryotic translation initiation factor 3 subunit L	40	22	30	22	22	549.2	352.791	297.938	297.004	309.503	409.882	399.976	338.796	0.847042	0.522899	-
SPAG1	A0A8I3QFU5	Sperm associated antigen 1	12	12	12	12	12	182.3	168.259	132.487	153.645	144.237	409.75	161.015	235.878	1.46494	0.481272	-
PSMA5	A0A8I3N3S4	Proteasome subunit alpha type	61	12	50	12	12	484.2	502.249	467.038	449.343	413.941	409.091	484.495	424.125	0.875395	0.0223536	-
ITIH4	A0A8I3Q3G3	Inter-alpha-trypsin inhibitor heavy chain 4	13	12	13	12	12	70.2	161.781	119.276	218.14	151.294	409.091	117.086	259.508	2.2164	0.199033	-
RETNLB	A0A8I3PZH2	Resistin-like beta	22	4	14	4	4	287.4	508.884	732.388	334.721	290.592	408.827	509.558	344.713	0.676495	0.327249	-
HEXB	A0A8I3MY15	Beta-hexosaminidase	39	18	27	18	18	336.2	369.064	401.738	375.214	366.662	408.167	369	383.348	1.03888	0.567334	-
OLA1	A0A8I3SCD6	Obg-like ATPase 1	55	17	29	17	17	640.4	679.197	521.768	622.582	640.318	407.639	613.789	556.846	0.907228	0.560999	-
LOC608684	A0A8I3S3L3	Small ribosomal subunit protein eS1	44	14	24	13	14	293.4	447.11	324.234	343.865	307.81	405.793	354.915	352.489	0.993166	0.967343	-
LOC100687051	A0A8I3PED6	Small ribosomal subunit protein eS1	42	11	19	10	11	291.7	447.11	313.791	343.865	307.81	405.793	350.867	352.489	1.00462	0.978718	-
ALOX15B	A0A8I3Q2D9	Arachidonate 15-lipoxygenase type B	48	23	38	23	23	323.7	495.771	482.891	976.407	992.725	405.397	434.121	791.51	1.82325	0.19921	-
SF3B1	A0A8I3QBG5	Splicing factor 3b subunit 1	30	32	40	32	32	485.2	348.999	382.991	314.148	319.524	405.397	405.73	346.356	0.853662	0.310731	-
GSPT2	A0A8I3PUS2	G1 to S phase transition 2	26	16	27	16	16	488.1	459.118	471.819	411.952	388.396	405.133	473.012	401.827	0.849507	0.00319318	-
SERPING1	A0A8I3S1V7	Serpin family G member 1	21	9	14	9	9	124.4	195.907	260.444	206.711	209.158	404.869	193.584	273.579	1.41324	0.366801	-
SERPINB8	A0A8I3N0U2	Serpin family B member 8	45	18	40	17	18	442.7	542.22	528.437	638.583	684.069	404.737	504.452	575.796	1.14143	0.504331	-
RAD23B	A0A8I3NK06	UV excision repair protein RAD23	42	14	26	12	14	559.1	578.242	457.601	569.679	571.022	404.737	531.648	515.146	0.968962	0.818353	-
CUL5	A0A8I3MVH1	Cullin 5	40	29	31	29	29	422.7	404.453	429.292	433.342	414.647	403.946	418.815	417.311	0.99641	0.901185	-
HMGB2	A0A8I3P9Q5	High mobility group box 2	35	9	12	5	9	283.6	118.808	139.281	245.245	494.81	403.418	180.563	381.158	2.11094	0.0956218	-
RANBP1	A0A8I3PXA5	Uncharacterized protein	48	13	19	13	13	366.7	513.782	410.545	372.112	492.411	402.89	430.342	422.471	0.981709	0.896324	-
LOC100686502	A0A8I3NY59	creatine kinase	31	12	49	11	12	315.1	387.548	352.543	349.416	306.116	402.89	351.73	352.808	1.00306	0.976995	-
ABR	A0A8I3NPZ9	Active breakpoint cluster region-related protein	30	24	36	20	24	381.3	497.825	368.396	482.978	432.43	402.758	415.84	439.389	1.05663	0.651445	-
PTBP1	A0A8I3NY06	Polypyrimidine tract-binding protein 1	47	18	45	15	18	390.2	273.638	196.78	313.332	264.059	402.758	286.873	326.716	1.13889	0.599232	-
RPL24	A0A8I3PCR7	Uncharacterized protein	44	9	12	9	9	372.4	257.049	319.578	261.899	218.614	402.626	316.342	294.38	0.930573	0.755184	-
LOC474964	A0A8I3NF06	Uncharacterized protein	25	13	20	13	13	430.8	438.105	375.819	363.132	303.011	401.571	414.908	355.905	0.857792	0.174176	-
S100A5	A0A8I3MF05	Protein S100	45	6	13	6	6	280.8	286.909	159.538	293.738	420.01	401.175	242.416	371.641	1.53308	0.0867886	-
ME1	A0A8I3NIY1	Malic enzyme	63	27	61	27	27	803	956.943	1065.93	822.925	825.624	400.516	941.958	683.022	0.725108	0.202942	-
ABHD10	A0A8I3S6T8	Serine aminopeptidase S33 domain-containing protein	5	2	2	2	2	122.1	56.8762	144.691	87.1908	82.7036	399.065	107.889	189.653	1.75785	0.520151	-
OSBPL1A	A0A8I3NPK5	Oxysterol-binding protein	8	8	8	8	8	278.4	231.297	209.865	219.447	223.271	398.933	239.854	280.55	1.16967	0.570922	-
PSMB1	A0A8I3PKH4	Proteasome subunit beta	63	13	36	13	13	478.2	565.603	541.019	542.085	564.247	398.141	528.274	501.491	0.949302	0.677329	-
SWAP70	A0A8I3NGF0	Switching B cell complex subunit SWAP70	48	28	37	28	28	534.3	444.899	372.171	437.587	414.082	397.877	450.456	416.516	0.924652	0.547959	-
ACTR2	A0A8I3S593	Actin related protein 2	43	16	41	15	16	445.7	540.64	497.486	519.553	467.289	397.613	494.609	461.485	0.933031	0.50244	-
EPS8L1	A0A8I3MEC0	EPS8 like 1	47	28	39	28	28	478.2	412.037	448.668	445.751	524.73	397.481	446.302	455.988	1.0217	0.831428	-
RTRAF	A0A8I3MKM6	RNA transcription, translation and transport factor protein	68	15	23	15	15	301.9	295.124	217.791	303.698	266.317	397.35	271.605	322.455	1.18722	0.350645	-
H1-4	A0A8I3PW81	H1.4 linker histone, cluster member	36	13	31	4	13	254.7	106.169	207.978	180.096	213.533	396.294	189.616	263.308	1.38864	0.4181	-
PIP	A0A8I3PBW1	Prolactin-induced protein	68	12	68	12	12	419.1	1553.35	2143.82	1014.61	965.487	396.03	1372.09	792.044	0.577253	0.374854	-
CRISP2	A0A8I3N459	Cysteine rich secretory protein 3	43	14	83	5	14	495.7	1337.07	1320.09	1403.87	1689.78	395.503	1050.95	1163.05	1.10667	0.828296	-
NIBAN2	A0A8I3NCX0	Niban apoptosis regulator 2	37	25	41	25	25	387.3	600.518	424.259	585.028	474.91	395.371	470.693	485.103	1.03062	0.874923	-
ABHD14B	A0A8I3SCV3	Abhydrolase domain containing 14B	61	10	25	10	10	624.1	522.787	518.497	387.624	325.451	395.371	555.128	369.482	0.665579	0.0152512	Down
LMNB1	A0A8I3NBF9	Lamin B1	51	28	37	24	28	368.7	772.727	763.969	780.962	662.899	395.239	635.132	613.033	0.965206	0.905967	-
MYL9	A0A8I3PWM8	Myosin light chain 9	47	8	43	8	8	377.2	532.425	382.991	552.862	421.704	394.975	430.872	456.513	1.05951	0.734286	-
PON3	A0A8I3PAM3	Paraoxonase 3	28	14	26	14	14	684.7	219.289	669.731	325.578	273.938	394.843	524.573	331.453	0.631852	0.33268	-
OPLAH	A0A8I3MWT8	5-oxoprolinase, ATP-hydrolysing	22	21	26	21	21	397.1	261.473	248.743	240.999	220.167	394.843	302.438	285.336	0.943452	0.825852	-
RPL4	A0A8I3P0P4	Large ribosomal subunit protein uL4	44	20	34	20	20	442.3	412.669	543.409	319.536	294.402	394.711	466.126	336.217	0.7213	0.0635664	-
LOC100856765	A0A8I3SA72	Large ribosomal subunit protein uL4	44	20	34	20	20	442.3	412.669	543.409	319.536	294.402	394.711	466.126	336.217	0.7213	0.0635664	-
ANXA11	A0A8I3P2S6	Annexin	38	21	27	20	21	285.5	381.071	386.136	413.095	299.06	393.92	350.902	368.691	1.0507	0.73039	-
PSMD8	A0A8I3N165	26S proteasome non-ATPase regulatory subunit 8	50	18	29	18	18	486.5	543.642	434.576	502.735	444.285	393.656	488.239	446.892	0.915313	0.405941	-
COPZ1	A0A8I3NSE2	Coatomer subunit zeta	32	4	6	4	4	452.3	278.378	327.002	175.198	128.713	393.392	352.56	232.434	0.659276	0.292993	-
ECHS1	A0A8I3PTP5	Enoyl-CoA hydratase, short chain 1	25	16	29	16	16	325.3	206.966	398.467	239.53	303.999	393.26	310.244	312.263	1.00651	0.978864	-
EPHX1	A0A8I3N2D1	Epoxide hydrolase	39	18	39	18	18	919.9	564.497	674.009	475.304	302.447	392.468	719.468	390.073	0.542169	0.0699364	-
TBCD	A0A8I3PWC3	Tubulin-specific chaperone D	35	37	46	37	37	434.8	433.681	399.851	391.216	415.635	391.809	422.777	399.553	0.945068	0.18086	-
PAFAH1B1	A0A8I3NIJ2	Platelet-activating factor acetylhydrolase IB subunit alpha	40	17	34	17	17	435.9	483.448	429.04	439.546	326.439	391.545	449.463	385.843	0.858455	0.183339	-
PSMD5	A0A8I3NY49	26S proteasome non-ATPase regulatory subunit 5	61	21	43	21	21	423	347.735	383.494	376.847	343.375	391.017	384.743	370.413	0.962755	0.614381	-
LOC610717	A0A8I3S9A3	26S proteasome non-ATPase regulatory subunit 5	61	21	43	21	21	423	347.735	383.494	376.847	343.375	391.017	384.743	370.413	0.962755	0.614381	-
PSMB3	A0A8I3RXV3	Proteasome subunit beta	45	12	34	12	12	480.4	495.613	510.948	470.896	440.615	390.094	495.654	433.868	0.875346	0.106296	-
TSN	A0A8I3PL12	Translin	45	14	31	14	14	508	528.633	525.92	551.719	694.371	389.962	520.851	545.351	1.04704	0.806959	-
PPID	A0A8I3N9P9	Peptidylprolyl isomerase D	56	17	22	17	17	268.9	434.629	251.637	318.557	385.009	389.698	318.389	364.421	1.14458	0.523248	-
NIPSNAP2	A0A8I3NCW1	NIPSNAP domain-containing protein	20	6	12	6	6	429.5	193.063	450.807	300.596	306.398	389.434	357.79	332.143	0.928318	0.792088	-
LOC106559080	A0A8I3NUC2	Large ribosomal subunit protein uL15	20	3	3	3	3	482.5	190.061	451.939	102.376	160.326	389.434	374.834	217.379	0.579934	0.285114	-
SART3	A0A8I3PXC8	Spliceosome associated factor 3, U4/U6 recycling protein	27	27	33	27	27	292.3	325.458	243.458	223.692	153.693	388.907	287.072	255.431	0.889778	0.702372	-
PITPNA	A0A8I3NQG7	Phosphatidylinositol transfer protein alpha	72	21	28	18	21	319.9	466.701	307.752	363.295	281.7	386.664	364.784	343.886	0.942712	0.749086	-
HSD17B13	A0A8I3RYU0	Hydroxysteroid 17-beta dehydrogenase 11	57	20	49	18	20	1442.8	425.466	752.771	391.053	267.022	386.004	873.679	348.026	0.398346	0.220032	-
NME1	Q50KA9	Nucleoside diphosphate kinase A	86	13	42	5	13	385	493.717	401.989	423.708	589.651	385.872	426.902	466.411	1.09255	0.61637	-
CMPK1	A0A8I3S201	UMP-CMP kinase	48	11	42	11	11	567.1	540.166	508.432	434.485	450.495	384.289	538.566	423.089	0.785585	0.0122689	-
CGN	A7YH32	Cingulin	35	39	43	38	39	425.4	459.276	387.395	449.506	401.804	383.366	424.023	411.559	0.970604	0.68576	-
PAPSS1	A0A8I3Q1T7	3'-phosphoadenosine 5'-phosphosulfate synthase 1	52	26	40	25	26	425.6	385.494	365.376	426.811	436.522	382.838	392.157	415.39	1.05925	0.391807	-
THOP1	A0A8I3N7K6	Thimet oligopeptidase 1	43	26	32	26	26	228.3	335.728	254.405	268.92	272.95	382.706	272.811	308.192	1.12969	0.513816	-
MAPRE3	A0A8I3N1W1	Microtubule associated protein RP/EB family member 3	17	5	6	3	5	170.4	209.652	146.704	211.283	188.129	382.047	175.585	260.486	1.48353	0.297593	-
PPP1R13B	A0A8I3PBP4	Protein phosphatase 1 regulatory subunit 13B	1	2	12	2	2	408	433.207	379.845	416.034	395.594	380.991	407.018	397.54	0.976714	0.638669	-
RPLP1	A0A8I3P6D3	Ribosomal protein lateral stalk subunit P1	67	3	7	2	3	409.4	383.125	354.053	278.717	417.893	380.859	382.192	359.156	0.939726	0.646353	-
TJP2	A0A8I3MNX3	Tight junction protein 2	27	27	33	27	27	468.2	424.676	463.263	432.199	400.393	380.2	452.046	404.264	0.894297	0.0803139	-
EFTUD2	A0A8I3MU66	116 kDa U5 small nuclear ribonucleoprotein component	42	33	48	32	33	477.8	502.407	472.448	372.275	240.066	380.068	484.218	330.803	0.68317	0.0721946	-
ATP5F1C	E2RNY7	ATP synthase subunit gamma	36	11	18	11	11	164.6	87.6842	276.926	177.157	211.416	379.936	176.403	256.17	1.45218	0.393598	-
GLYATL3	A0A8I3MSP4	Glycine N-acyltransferase-like protein	57	12	19	12	12	201.9	76.151	122.421	156.584	141.556	379.54	133.491	225.893	1.6922	0.361112	-
RHOA	A0A8I3PVV6	Ras homolog family member A	67	10	31	3	10	381.7	405.717	326.498	388.44	337.448	379.276	371.305	368.388	0.992143	0.923319	-
PSMC2	A0A8I3NXK9	Proteasome 26S subunit, ATPase 2	64	24	53	24	24	605.1	367.326	476.851	407.87	437.369	378.88	483.092	408.04	0.844642	0.389616	-
SCGB1A1	A0A8I3N2M1	Isoaspartyl peptidase/L-asparaginase	41	13	38	4	13	283.3	838.293	683.193	737.203	781.027	378.617	601.595	632.282	1.05101	0.890681	-
MTAP	A0A8I3NWN6	S-methyl-5'-thioadenosine phosphorylase	77	17	41	17	17	546.6	509.832	585.433	545.351	489.871	378.485	547.288	471.235	0.861037	0.259005	-
XPO7	A0A8I3Q5B5	Exportin 7	38	36	41	36	36	468.7	545.538	432.941	429.096	417.611	378.353	482.393	408.353	0.846516	0.142125	-
DHX15	A0A8I3N998	RNA helicase	37	27	45	27	27	390.8	434.313	327.505	400.196	318.818	378.089	384.206	365.701	0.951836	0.664313	-
PIR	A0A8I3Q1B6	Pirin	50	13	30	13	13	613.1	1029.46	821.342	453.752	407.308	377.825	821.301	412.962	0.502814	0.0722818	-
PPA2	A0A8I3PUL1	inorganic diphosphatase	60	18	24	18	18	325.2	245.99	314.294	315.944	275.632	377.561	295.161	323.046	1.09447	0.511578	-
ACTN1	A0A8I3RT50	Actinin alpha 1	44	37	109	16	37	139.7	194.169	150.856	172.422	236.397	377.429	161.575	262.083	1.62205	0.234405	-
CNDP2	A0A8I3MEU4	Carnosine dipeptidase 2	66	25	53	25	25	551.7	477.918	460.369	389.91	479.85	376.374	496.663	415.378	0.836338	0.132351	-
BLMH	A0A8I3NM77	Bleomycin hydrolase	55	20	37	20	20	480.3	551.542	496.479	606.091	570.034	376.242	509.44	517.455	1.01573	0.92284	-
CSDE1	A0A8I3PU40	Cold shock domain containing E1	30	28	34	28	28	428.7	403.347	411.174	391.542	370.049	374.923	414.407	378.838	0.914169	0.0238626	-
USP5	A0A8I3PWW2	Ubiquitin carboxyl-terminal hydrolase	54	35	54	33	35	496.7	486.292	487.798	456.037	468.56	373.735	490.263	432.777	0.882745	0.19166	-
CLINT1	A0A8I3MHS0	Clathrin interactor 1	26	17	29	17	17	455.5	441.739	271.893	292.432	296.801	373.076	389.711	320.77	0.823097	0.37022	-
RNMT	A0A8I3RRE2	mRNA cap guanine-N7 methyltransferase	40	18	18	18	18	535.1	654.867	529.947	517.267	471.1	371.889	573.304	453.418	0.790886	0.113016	-
AHCYL1	A0A8I3MSS1	Adenosylhomocysteinase like 1	41	25	43	9	25	399.3	229.401	215.401	193.322	157.363	370.174	281.367	240.286	0.853994	0.666644	-
DHFR	A0A8I3N1Y0	Dihydrofolate reductase	69	14	23	5	14	558.1	521.366	603.676	551.556	584.994	369.646	561.047	502.065	0.894871	0.478097	-
BUD23	A0A8I3MPU0	BUD23 rRNA methyltransferase and ribosome maturation factor	2	1	1	1	1	52	70.7793	72.3455	112.989	159.197	369.514	65.0416	213.9	3.28866	0.19926	-
S100A10	E2RGM0	Protein S100-A10	28	3	6	3	3	593.4	374.119	333.796	769.696	643.281	369.382	433.772	594.12	1.36966	0.332713	-
GMPS	A0A8I3PJ81	GMP synthase (glutamine-hydrolyzing)	36	26	27	26	26	277.4	172.841	204.581	224.345	202.807	367.799	218.274	264.984	1.214	0.490934	-
CACYBP	A0A8I3RY44	Calcyclin-binding protein	38	14	24	14	14	354.4	341.573	341.848	337.497	290.45	367.403	345.941	331.784	0.959077	0.594165	-
MYCBP	J9P9G9	MYC binding protein	74	8	15	8	8	308.7	340.309	270.509	282.799	256.861	366.876	306.506	302.178	0.98588	0.917745	-
TXNL1	A0A8I3MP30	Thioredoxin like 1	55	11	27	11	11	253.3	394.5	323.73	373.582	433.841	366.744	323.843	391.389	1.20857	0.237786	-
NPM1	A0A8I3MH65	Nucleophosmin 1	42	10	20	10	10	274.2	191.167	240.313	177.647	164.419	366.348	235.227	236.138	1.00387	0.990503	-
LACTB2	A0A8I3PYE9	Endoribonuclease LACTB2	45	12	27	12	12	465.2	388.18	471.944	372.439	376.541	366.084	441.775	371.688	0.841351	0.119095	-
ROPN1L	A0A8I3PEU3	Rhophilin associated tail protein 1 like	24	4	5	4	4	33.3	62.8798	50.9564	70.2098	53.348	366.084	49.0454	163.214	3.32781	0.377674	-
EPS15	A0A8I3PJA6	Epidermal growth factor receptor pathway substrate 15	26	17	17	17	17	273.3	380.439	323.227	322.475	265.047	365.952	325.655	317.825	0.975954	0.863022	-
MAPRE1	A0A8I3PST2	Microtubule associated protein RP/EB family member 1	54	14	23	13	14	318.2	389.444	303.474	343.049	349.162	365.556	337.039	352.589	1.04614	0.621602	-
TRIM22	A0A8I3PE47	Tripartite motif containing 22	41	20	24	20	20	462.8	414.407	346.378	370.969	235.268	365.161	407.861	323.799	0.793895	0.210614	-
GPX4	A0A8I3NM22	Glutathione peroxidase	44	9	12	9	9	242.4	260.999	218.798	283.615	214.38	364.633	240.732	287.543	1.19445	0.395439	-
RPL7	A0A8I3Q3I5	Ribosomal protein L7	42	16	22	8	16	388.9	443.319	445.523	313.495	277.184	364.501	425.914	318.393	0.747554	0.0305472	-
KIF5C	A0A8I3MWZ5	Kinesin-like protein	14	13	19	13	13	364.5	491.19	389.911	437.587	376.682	363.841	415.2	392.704	0.945817	0.648375	-
TTC37	A0A8I3S0I0	Tetratricopeptide repeat domain 37	29	36	37	36	36	299.2	341.257	296.931	303.698	307.104	363.577	312.463	324.793	1.03946	0.639075	-
SCGB1C1	A0A8I3QFJ6	Uncharacterized protein	40	4	22	4	4	135.8	324.827	647.838	275.941	451.906	363.05	369.488	363.632	0.984151	0.973214	-
ACACA	A0A8I3N2K7	Acetyl-CoA carboxylase 1	22	44	46	44	44	327.3	438.421	364.999	346.314	389.102	362.522	376.907	365.979	0.971008	0.778005	-
HTT	A0A8I3RYG3	Huntingtin	16	39	40	39	39	338.5	404.453	357.576	379.786	347.75	362.522	366.843	363.353	0.990486	0.882789	-
ARPC1B	A0A8I3MVD4	Actin-related protein 2/3 complex subunit	57	16	31	15	16	382.5	484.238	352.291	468.12	415.07	362.126	406.343	415.106	1.02156	0.870683	-
VAT1	A0A8I3RT77	Vesicle amine transport 1	36	11	25	3	11	420.3	588.985	510.319	576.7	491.564	361.862	506.535	476.709	0.941118	0.72675	-
LOC478509	A0A5F4D4Q9	Large ribosomal subunit protein eL34	30	4	5	4	4	693.5	408.087	405.89	197.077	282.406	361.862	502.492	280.449	0.558115	0.130887	-
VBP1	A0A8I3P4S3	Prefoldin subunit 3	62	12	21	12	12	442.9	550.12	431.431	500.776	493.822	361.203	474.817	451.934	0.951806	0.718864	-
LOC119879604	A0A8I3NQH6	Proteasome subunit alpha type	55	13	46	13	13	495.4	583.139	538.125	536.207	487.612	361.203	538.888	461.674	0.856716	0.278148	-
SRRT	A0A8I3MWW9	Arsenite-resistance protein 2	24	20	22	20	20	420.1	149.458	205.335	135.031	133.229	359.62	258.298	209.293	0.810279	0.683451	-
OXSR1	A0A8I3S7C3	non-specific serine/threonine protein kinase	30	14	19	12	14	266.4	299.232	282.085	282.472	230.61	359.356	282.572	290.813	1.02916	0.848647	-
GK	A0A8I3NWT5	glycerol kinase	50	24	32	24	24	416.2	505.725	448.291	540.616	469.547	359.224	456.738	456.462	0.999396	0.996563	-
MROH1	A0A8I3N513	Maestro heat like repeat family member 1	21	30	32	5	30	236	219.605	200.429	223.202	195.609	358.96	218.678	259.257	1.18557	0.507903	-
USP24	A0A8I3S0L4	ubiquitinyl hydrolase 1	15	34	38	34	34	332.5	388.496	306.116	358.397	299.342	358.301	342.371	338.68	0.989219	0.911915	-
HMGCLL1	A0A8I3NIT7	hydroxymethylglutaryl-CoA lyase	1	1	1	1	1	442.3	114.384	326.373	144.175	132.664	356.717	294.352	211.186	0.717459	0.530652	-
ME2	A0A8I3N4X1	Malic enzyme	25	13	13	12	13	153.7	117.544	172.874	129.317	109.236	356.586	148.04	198.38	1.34004	0.593177	-
PSMB8	Q5W416	Proteasome subunit beta type-8	48	10	30	10	10	733	626.429	758.684	416.524	383.598	356.322	706.038	385.481	0.545978	0.00744612	Down
ASS1	A0A8I3P8L4	Argininosuccinate synthase	54	20	34	20	20	526	610.314	334.048	547.637	552.251	355.003	490.12	484.963	0.989478	0.963098	-
C1QBP	A0A8I3MHG7	Complement component 1 Q subcomponent-binding protein, mitochondrial	11	3	5	3	3	226.3	185.48	583.671	302.719	383.316	354.871	331.817	346.968	1.04566	0.916391	-
RPS21	A0A8I3NWI3	40S ribosomal protein S21	54	6	15	6	6	348.4	286.909	316.559	234.142	233.715	354.211	317.289	274.023	0.863637	0.40233	-
RPS10	A0A8I3PQS5	Ribosomal protein S10	47	10	18	10	10	262.9	578.4	267.616	269.9	236.538	354.079	369.638	286.839	0.775999	0.51777	-
SMC3	A0A8I3PXW3	Structural maintenance of chromosomes protein	32	35	36	35	35	363.8	295.282	245.472	272.512	220.731	353.024	301.518	282.089	0.935563	0.725655	-
MAPK1	A0A8I3PZP0	Mitogen-activated protein kinase	44	17	36	13	17	381.1	416.302	368.773	414.891	394.606	352.496	388.725	387.331	0.996413	0.955226	-
EIF4G2	A0A8I3NTR8	Eukaryotic translation initiation factor 4 gamma 2	27	23	28	22	23	282.4	256.733	210.494	249.163	214.945	352.496	249.876	272.201	1.08935	0.663553	-
RPL13	A0A8I3MST1	60S ribosomal protein L13	36	11	14	11	11	333	453.904	451.814	310.23	216.779	352.1	412.906	293.036	0.709693	0.101322	-
DDX5	A0A8I3PSN4	Probable ATP-dependent RNA helicase DDX5	41	28	35	19	28	277.3	188.008	190.992	268.757	276.196	351.836	218.767	298.93	1.36643	0.113074	-
UTRN	A0A8I3NQX0	Utrophin	15	42	43	42	42	347.5	339.52	292.905	435.138	245.711	351.836	326.642	344.229	1.05384	0.784052	-
ECI1	A0A8I3MN34	Enoyl-CoA delta isomerase 1	30	7	12	7	7	282.2	127.656	295.421	200.18	208.453	351.836	235.092	253.49	1.07826	0.813456	-
SAE1	A0A8I3MIJ2	SUMO1 activating enzyme subunit 1	51	15	17	15	15	433.9	317.559	376.7	314.965	284.664	351.573	376.053	317.067	0.843145	0.219949	-
VPS35	A0A8I3NTA9	Vacuolar protein sorting-associated protein 35	39	24	42	24	24	339.5	396.238	313.791	356.111	299.906	351.045	349.843	335.687	0.959537	0.666249	-
KHDRBS1	A0A8I3MSA0	KH RNA binding domain containing, signal transduction associated 1	17	8	13	6	8	452.9	212.496	120.911	261.246	189.823	350.913	262.102	267.327	1.01993	0.965066	-
CRK	A0A8I3NGQ0	CRK proto-oncogene, adaptor protein	34	13	23	13	13	419.6	505.251	418.472	370.316	501.02	350.781	447.774	407.372	0.909772	0.512897	-
HINT1	A0A8I3RVN4	Uncharacterized protein	60	6	14	6	6	342.8	461.171	298.818	395.461	371.46	350.121	367.597	372.348	1.01292	0.932266	-
DOCK1	A0A8I3S6D8	Dedicator of cytokinesis 1	25	42	47	41	42	440.1	484.396	395.069	412.115	336.601	349.33	439.855	366.015	0.832127	0.101686	-
PCCA	A0A8I3PMG9	Propionyl-CoA carboxylase alpha chain, mitochondrial	38	24	26	24	24	323.6	229.559	409.664	252.755	235.55	349.33	320.941	279.212	0.869978	0.548005	-
SUCLA2	A0A8I3MVG8	Succinate--CoA ligase [ADP-forming] subunit beta, mitochondrial	32	18	22	3	18	371	138.083	277.304	187.281	176.274	349.33	262.129	237.628	0.906533	0.794491	-
SHTN1	A0A8I3QQN2	Shootin-1	55	33	45	33	33	345.9	415.197	320.333	410.319	385.15	348.934	360.477	381.468	1.05823	0.570557	-
NAPRT	A0A8I3NS26	Nicotinate phosphoribosyltransferase	27	15	17	15	15	469.7	328.618	278.813	283.942	180.508	348.011	359.044	270.82	0.754282	0.307074	-
TTC26	A0A8I3SCY0	Intraflagellar transport protein 56	11	6	7	6	6	64.4	88.4741	72.9746	89.64	70.9896	347.483	75.2829	169.371	2.24979	0.402243	-
SERPINB10	A0A8I3MHW7	Serpin family B member 10	62	21	52	21	21	374.7	744.289	439.106	688.057	653.02	347.087	519.365	562.721	1.08348	0.796429	-
GANAB	A0A8I3N788	Glucosidase II alpha subunit	35	29	45	29	29	457.1	310.923	530.827	388.114	376.541	347.087	432.95	370.581	0.855943	0.437255	-
CBR1	A0A8I3S669	Carbonyl reductase (NADPH)	42	11	28	6	11	295	219.289	228.738	235.448	261.377	346.296	247.676	281.04	1.13471	0.466849	-
ACAA2	A0A8I3RZ46	Acetyl-CoA acyltransferase 2	64	20	33	20	20	334.9	142.981	476.6	165.891	210.005	346.164	318.16	240.687	0.756495	0.532784	-
RPS9	A0A8I3RS69	Small ribosomal subunit protein uS4	45	11	19	11	11	229	306.184	255.411	219.936	156.092	345.636	263.532	240.555	0.912812	0.730893	-
GOLPH3L	A0A8I3NX17	Golgi phosphoprotein 3 like	25	8	8	8	8	171.5	181.372	157.021	109.887	100.063	345.504	169.964	185.151	1.08935	0.867596	-
DYNC1LI1	A0A8I3PHA3	Dynein light intermediate chain	29	18	24	17	18	393.5	556.597	430.424	457.67	450.071	345.24	460.174	417.661	0.907615	0.529142	-
SYNE2	A0A8I3MJS4	Spectrin repeat containing nuclear envelope protein 2	7	43	44	42	43	334.1	276.166	261.325	285.411	233.715	344.185	290.53	287.77	0.990501	0.947204	-
DPYS	A0A8I3RVL6	Dihydropyrimidinase	54	22	59	21	22	1003.7	939.564	961.252	520.696	888.852	344.053	968.172	584.534	0.60375	0.137484	-
ACIN1	A0A8I3MMI9	Apoptotic chromatin condensation inducer 1	16	19	22	19	19	287	230.191	249.749	215.201	193.916	343.789	255.647	250.969	0.981702	0.932024	-
AIMP1	A0A8I3Q1I7	Uncharacterized protein	59	17	26	17	17	273.3	329.566	239.558	263.042	267.587	343.393	280.808	291.341	1.03751	0.789977	-
VAPA	A0A8I3MT19	VAMP associated protein A	44	9	19	8	9	298.5	189.271	194.893	240.02	252.768	343.393	227.555	278.727	1.22488	0.34835	-
CBS	A0A8I3P3Z8	Cystathionine beta-synthase	36	19	28	19	19	440.6	381.703	362.734	263.858	320.935	343.13	395.012	309.308	0.783033	0.0615962	-
GSTO1	A0A8I3QSL3	Glutathione S-transferase omega	77	19	35	19	19	259.2	637.488	488.804	733.611	795.281	342.734	461.831	623.875	1.35087	0.420374	-
SERPINF2	A0A8I3P3Z6	Serpin family F member 2	24	11	16	11	11	61.4	110.435	92.9797	106.131	209.582	341.678	88.2715	219.13	2.48246	0.190657	-
PLIN3	A0A8I3S0Q9	Perilipin	59	20	34	20	20	520.1	355.318	367.767	314.638	284.382	341.546	414.395	313.522	0.756578	0.18987	-
DCTN3	A0A8I3Q2C8	Dynactin subunit 3	60	12	16	12	12	352.4	388.97	326.373	321.169	259.966	341.151	355.914	307.429	0.863771	0.192158	-
LOC106560013	A0A8I3MZ53	60S ribosomal protein L21	22	6	8	6	6	323.1	290.385	396.957	272.675	156.516	341.151	336.814	256.781	0.762382	0.284241	-
LOC106558139	A0A8I3P0H6	60S ribosomal protein L21	22	6	8	6	6	323.1	290.385	396.957	272.675	156.516	341.151	336.814	256.781	0.762382	0.284241	-
LOC106558335	F1PWM2	60S ribosomal protein L21	22	6	8	6	6	323.1	290.385	396.957	272.675	156.516	341.151	336.814	256.781	0.762382	0.284241	-
ACTA1	A0A8I3MHG9	Actin alpha 1, skeletal muscle	47	21	297	4	21	369.6	419.462	379.594	377.827	427.349	340.887	389.552	382.021	0.980667	0.812444	-
MPO	A0A8I3P6H2	Myeloperoxidase	38	21	23	21	21	151.3	233.509	324.737	603.152	412.953	340.623	236.515	452.243	1.91211	0.0926038	-
SULT1C4	A0A8I3N072	Sulfotransferase	64	17	52	16	17	591.8	540.798	634.124	537.514	588.663	340.491	588.907	488.889	0.830163	0.317002	-
ACTC1	A0A8I3QWF2	Uncharacterized protein	46	20	296	3	20	332.8	401.451	365.376	371.296	427.349	340.227	366.543	379.624	1.03569	0.707347	-
ACTA2	A0A8I3Q4M4	Actin alpha 2, smooth muscle	43	19	289	3	19	332.8	401.451	365.376	371.296	427.349	340.227	366.543	379.624	1.03569	0.707347	-
ACTG2	A0A8I3PAR6	Actin gamma 2, smooth muscle	43	19	289	3	19	332.8	401.451	365.376	371.296	427.349	340.227	366.543	379.624	1.03569	0.707347	-
EIF3J	A0A8I3Q3R6	Eukaryotic translation initiation factor 3 subunit J	41	13	19	13	13	402.1	398.45	386.262	385.991	355.23	340.227	395.604	360.483	0.911221	0.108231	-
CD2AP	A0A8I3S099	CD2 associated protein	53	26	33	26	26	437.4	398.924	340.716	367.704	296.519	339.7	392.347	334.641	0.852922	0.179867	-
DCTN2	A0A8I3NX29	Dynactin subunit 2	62	21	39	21	21	519	483.922	408.406	432.525	434.829	339.04	470.443	402.131	0.854793	0.206856	-
BLVRB	A0A8I3MIS0	Biliverdin reductase B	49	10	39	3	10	241.3	234.93	234.777	296.841	277.89	338.248	237.002	304.326	1.28406	0.0615071	-
LOC478743	H9GWB1	Histone H2B	59	10	32	2	10	352.7	573.66	672.499	517.594	378.376	337.325	532.953	411.098	0.771359	0.341004	-
H2BC15	J9P6S8	Histone H2B	59	10	32	2	10	352.7	573.66	672.499	517.594	378.376	337.325	532.953	411.098	0.771359	0.341004	-
RPS4X	A0A8I3PBZ1	40S ribosomal protein S4	51	13	21	13	13	173.9	359.426	333.67	286.881	299.483	337.193	288.999	307.852	1.06524	0.779792	-
RAD50	A0A8I3NID5	RAD50 double strand break repair protein	21	30	35	30	30	345.4	323.089	208.984	338.967	243.312	336.929	292.491	306.403	1.04756	0.805934	-
COL1A1	A0A8I3RX37	Collagen type I alpha 1 chain	3	3	3	3	3	12.1	14.693	12.456	24.4918	25.545	336.929	13.083	128.989	9.85925	0.380935	-
RAB3GAP2	A0A8I3Q2G9	RAB3 GTPase activating non-catalytic protein subunit 2	19	25	27	25	25	354.7	304.92	301.964	280.839	254.603	335.742	320.528	290.395	0.905989	0.368826	-
ISOC1	A0A8I3RV78	Isochorismatase domain containing 1	41	11	36	11	11	424.4	500.353	486.539	466.324	393.336	335.478	470.431	398.379	0.846839	0.194682	-
OAS3	A0A8I3S2W7	2'-5' oligoadenylate synthase	24	26	33	25	26	823.6	422.148	449.8	358.07	365.109	335.214	565.183	352.798	0.624219	0.242164	-
PRMT8	A0A8I3PK24	Protein arginine methyltransferase 8	5	2	6	2	2	240.1	342.837	242.326	332.272	244.582	335.082	275.088	303.979	1.10503	0.556878	-
RPL6	A0A8I3PB62	60S ribosomal protein L6	47	16	28	16	16	582.6	348.683	405.512	210.466	225.247	335.082	445.598	256.932	0.5766	0.097543	-
NPL	A0A8I3MMF0	N-acetylneuraminate lyase	17	8	9	8	8	39.2	83.2605	55.3601	89.1502	62.2394	333.367	59.2735	161.586	2.7261	0.357069	-
DSG1	A0A8I3NIB1	Desmoglein 1	43	33	63	1	33	552.9	487.082	1248.24	857.213	1467.35	332.18	762.742	885.582	1.16105	0.779806	-
JAG2	A0A8I3PQQ3	Jagged canonical Notch ligand 2	9	1	1	1	1	82	142.191	103.926	96.1712	177.262	331.52	109.372	201.651	1.84372	0.311701	-
COPS4	A0A8I3P5Y3	COP9 signalosome complex subunit 4	66	23	35	23	23	303.1	317.559	343.232	318.883	312.891	331.388	321.297	321.054	0.999244	0.986263	-
ROCK1	A0A8I3MEB5	Rho-associated protein kinase	25	31	35	28	31	282.5	305.71	242.955	305.658	297.93	331.125	277.055	311.571	1.12458	0.194023	-
SEC24C	A0A8I3N7T1	SEC24 homolog C, COPII coat complex component	38	30	36	29	30	399	402.873	332.915	319.536	226.8	331.125	378.263	292.487	0.773237	0.107778	-
SRP72	A0A8I3NS89	Signal recognition particle subunit SRP72	35	16	19	16	16	231.7	220.395	176.146	257.817	255.591	330.993	209.414	281.467	1.34407	0.0827602	-
MMUT	A0A8I3NEF1	Methylmalonyl-CoA mutase, mitochondrial	29	17	18	17	17	264.5	124.18	295.799	184.995	171.335	330.861	228.16	229.063	1.00396	0.990768	-
PLAA	A0A8I3RZW5	Phospholipase A2 activating protein	43	31	41	31	31	360.2	362.112	387.017	409.83	413.518	330.729	369.776	384.692	1.04034	0.643369	-
LOC607841	A0A8I3NBC7	peptidylprolyl isomerase	27	8	11	8	8	357.4	288.963	183.066	417.83	432.853	329.805	276.476	393.496	1.42326	0.135922	-
AASS	A0A8I3NR48	Aminoadipate-semialdehyde synthase	29	22	25	22	22	254.8	144.402	459.992	239.693	220.308	329.673	286.398	263.225	0.919087	0.831627	-
MYO10	A0A8I3MIN4	Myosin X	0	1	2	1	1	489.4	729.754	531.456	518.9	514.428	329.542	583.537	454.29	0.778511	0.25494	-
PGLS	A0A8I3SAK1	6-phosphogluconolactonase	66	12	32	12	12	451	564.971	473.958	518.247	481.544	329.41	496.643	443.067	0.892124	0.480615	-
MUC4	A0A8I3Q0F8	Mucin 4, cell surface associated	32	27	40	27	27	346	355.003	535.105	398.563	436.24	329.41	412.036	388.071	0.941838	0.751792	-
TUFM	A0A8I3N404	Elongation factor Tu	60	22	31	22	22	358.9	190.377	262.08	258.144	243.453	329.014	270.452	276.87	1.02373	0.915094	-
PGPEP1	A0A8I3PBL3	Pyroglutamyl-peptidase I	17	2	3	2	2	375.2	344.575	201.938	395.624	260.672	328.882	307.238	328.393	1.06885	0.766332	-
ATP5PO	J9P621	ATP synthase subunit O, mitochondrial	48	8	13	8	8	324.2	141.401	270.006	247.041	242.042	328.486	245.202	272.523	1.11142	0.684727	-
LOC111096443	A0A8I3RT15	Large ribosomal subunit protein eL34	15	2	3	2	2	406.1	294.651	350.656	195.771	219.32	328.354	350.469	247.815	0.707096	0.123422	-
TSPAN1	A0A8I3P9L4	Tetraspanin	10	3	15	3	3	95.5	147.246	169.477	193.812	161.455	328.354	137.408	227.874	1.65838	0.211729	-
APEX1	A0A8I3PLA3	DNA-(apurinic or apyrimidinic site) endonuclease	25	14	22	14	14	423.7	282.327	192.376	318.557	284.664	328.09	299.468	310.437	1.03663	0.886719	-
ETFA	A0A8I3PMN8	Electron transfer flavoprotein subunit alpha	57	15	31	15	15	316.5	137.767	310.016	207.527	180.508	328.09	254.761	238.709	0.93699	0.839616	-
RPL5	A0A8I3NV94	Uncharacterized protein	44	15	33	15	15	275.3	370.17	313.036	254.388	277.325	327.827	319.502	286.513	0.89675	0.403076	-
CDH1	A0A8I3NBM1	Cadherin 1	23	16	20	16	16	329.5	427.204	276.045	457.67	442.732	327.431	344.25	409.278	1.1889	0.342759	-
COPS5	A0A8I3PK82	COP9 signalosome subunit 5	57	16	23	16	16	317.3	374.593	319.075	343.212	304.281	326.903	336.989	324.799	0.963825	0.614114	-
FN3KRP	A0A8I3PPB5	protein-ribulosamine 3-kinase	33	9	15	9	9	287.9	327.986	272.9	301.739	212.828	325.98	296.262	280.182	0.945724	0.70279	-
UAP1	A0A8I3S616	UDP-N-acetylglucosamine pyrophosphorylase 1	36	15	26	14	15	283.8	415.197	350.53	395.134	319.524	324.924	349.842	346.527	0.990525	0.945489	-
PCBP1	A0A8I3PTN2	Poly(rC) binding protein 1	58	15	34	10	15	345.9	311.713	256.795	242.632	245.288	324.924	304.803	270.948	0.888929	0.417196	-
NONO	A0A8I3P1C0	Non-POU domain containing octamer binding	41	19	25	17	19	475.8	176.948	177.152	199.2	160.185	324.528	276.633	227.971	0.824091	0.691979	-
ATP2A2	A0A8I3PYB2	Calcium-transporting ATPase	34	30	42	24	30	806.5	292.597	368.144	381.582	308.657	323.737	489.08	337.992	0.691077	0.445681	-
ARF4	A0A8I3PMI1	ADP-ribosylation factor	68	12	37	5	12	281.5	240.934	233.015	213.569	178.815	323.473	251.817	238.619	0.94759	0.797004	-
ARFGEF2	A0A8I3S7J1	ADP ribosylation factor guanine nucleotide exchange factor 2	18	30	33	20	30	403.4	357.372	327.882	284.595	242.324	323.341	362.885	283.42	0.781019	0.0687616	-
PPP2CB	A0A8I3S1W8	Serine/threonine-protein phosphatase	63	16	38	3	16	369.6	369.538	367.641	387.787	437.087	322.814	368.926	382.562	1.03696	0.72027	-
UMPS	A0A8I3Q010	Uridine 5'-monophosphate synthase	60	26	41	26	26	335.5	348.999	318.698	365.581	292.567	322.682	334.399	326.943	0.977705	0.768857	-
SNRPC	E2RGI3	U1 small nuclear ribonucleoprotein C	23	3	4	3	3	238.3	160.517	109.714	143.685	150.729	322.286	169.51	205.567	1.21271	0.635019	-
C1H9orf64	A0A8I3MYG7	Queuosine 5'-phosphate N-glycosylase/hydrolase	53	17	25	17	17	408.8	412.037	353.298	396.767	322.629	322.154	391.378	347.183	0.887079	0.234938	-
SNX5	A0A8I3P235	Sorting nexin	48	20	24	20	20	302.7	359.268	268.119	234.958	231.175	321.362	310.029	262.498	0.84669	0.297576	-
AK2	A0A8I3RSH9	Adenylate kinase 2, mitochondrial	77	15	47	15	15	545	309.502	453.198	328.68	346.903	321.099	435.9	332.227	0.762165	0.2687	-
S100A1	A0A8I3MR24	Protein S100	16	1	1	1	1	21.2	58.7721	23.0247	32.6557	44.4567	321.099	34.3323	132.737	3.86624	0.406193	-
GFPT2	A0A8I3N2Y7	glutamine--fructose-6-phosphate transaminase (isomerizing)	7	5	9	5	5	222.8	229.717	233.141	206.384	200.831	320.175	228.553	242.464	1.06087	0.755121	-
EIF3F	A0A8I3NFD2	Eukaryotic translation initiation factor 3 subunit F	28	10	19	10	10	423.2	488.82	370.157	371.786	265.611	319.911	427.392	319.103	0.746627	0.0790518	-
CCDC92B	A0A8I3NY05	CCDC92/74 N-terminal domain-containing protein	2	1	2	1	1	349.5	249.781	361.476	195.608	166.536	319.911	320.252	227.352	0.709914	0.195064	-
IFT122	A0A8I3PUJ2	Intraflagellar transport 122	12	12	12	12	12	68.3	89.2641	88.4503	104.172	59.9813	319.515	82.0048	161.223	1.96602	0.427356	-
RPLP2	A0A8I3N5I3	Large ribosomal subunit protein P2	92	8	19	7	8	371.9	461.013	387.52	249.163	354.948	319.384	406.811	307.832	0.756694	0.0764552	-
C9	A0A8I3MRL7	Complement C9	22	11	11	11	11	184.2	199.541	215.527	187.934	239.219	319.12	199.756	248.758	1.24531	0.326986	-
SLC25A6	A0A8I3S2Q1	ADP/ATP translocase	42	15	22	5	15	1034.3	309.502	729.369	788.636	520.214	318.988	691.057	542.613	0.785193	0.590039	-
LOC100685685	A0A8I3Q0A0	Large ribosomal subunit protein eL34	21	3	4	3	3	414.1	438.105	399.096	222.875	242.042	318.328	417.1	261.082	0.625945	0.0217307	Down
LOC119868753	A0A8I3PH90	ubiquitinyl hydrolase 1	21	26	32	26	26	398.2	281.695	314.672	230.06	221.437	318.064	331.522	256.52	0.773765	0.182435	-
CALB1	A0A8I3S1C4	Calbindin	4	1	1	1	1	24.4	32.5458	35.4808	34.4518	44.1744	317.932	30.8089	132.186	4.29052	0.389157	-
LOC479969	A0A8I3MYX1	RNA transcription, translation and transport factor protein	50	11	16	11	11	243.9	235.72	166.709	241.979	227.929	316.745	215.443	262.218	1.21711	0.274217	-
EIF3M	A0A8I3PRM4	Eukaryotic translation initiation factor 3 subunit M	33	10	17	10	10	308.1	319.929	269.503	256.021	182.061	316.745	299.177	251.609	0.841003	0.349255	-
ASAH1	A0A8I3NRT5	ceramidase	48	21	40	21	21	329	332.568	493.208	301.086	245.006	316.481	384.925	287.524	0.746962	0.206363	-
RAB5C	P51147	Ras-related protein Rab-5C	72	10	16	7	10	302.4	210.126	231.506	260.103	300.894	316.217	248.011	292.405	1.179	0.258493	-
PRPF19	A0A8I3S308	Pre-mRNA-processing factor 19	40	14	23	14	14	290.6	287.225	289.005	295.534	258.413	316.085	288.943	290.011	1.0037	0.95534	-
NUDT9	A0A8I3NWU3	Nudix hydrolase 9	46	17	25	17	17	381.7	352.949	343.106	339.946	341.964	315.162	359.252	332.357	0.925138	0.141734	-
MAN2C1	A0A8I3PHW0	alpha-mannosidase	28	22	28	22	22	359.3	286.119	188.224	276.431	286.64	315.03	277.881	292.7	1.05333	0.795898	-
DNALI1	A0A8I3QB93	Dynein axonemal light intermediate chain 1	26	7	8	7	7	21.4	45.027	41.8975	47.1875	43.6099	314.898	36.1082	135.232	3.74519	0.384861	-
DNAJC7	A0A8I3NI63	DnaJ heat shock protein family (Hsp40) member C7	38	22	28	22	22	370.3	333.516	276.423	309.087	294.543	314.634	326.746	306.088	0.936776	0.531012	-
EIF5A	A0A8I3PFB8	Eukaryotic translation initiation factor 5A	72	15	41	7	15	330.1	214.55	221.063	265.981	375.553	313.315	255.238	318.283	1.24701	0.270249	-
EIF4B	A0A8I3S3N6	Eukaryotic translation initiation factor 4B	28	14	20	14	14	424.4	119.598	214.143	183.199	231.598	312.392	252.714	242.396	0.959174	0.923252	-
GALE	A0A8I3P3X5	UDP-glucose 4-epimerase	47	16	26	16	16	277.5	275.376	243.71	276.921	341.54	312.128	265.529	310.196	1.16822	0.124598	-
GLRX3	A0A8I3Q4L8	Glutaredoxin 3	52	18	33	18	18	285.8	454.062	406.896	371.459	507.653	311.864	382.253	396.992	1.03856	0.856986	-
SUCLG1	A0A8I3P433	Succinate--CoA ligase [ADP/GDP-forming] subunit alpha, mitochondrial	26	7	24	7	7	446.9	215.34	398.215	271.859	257.002	311.864	353.485	280.242	0.792797	0.409028	-
CALB2	A0A8I3N067	Calretinin	11	3	3	3	3	19	28.5961	30.5738	34.2885	34.154	311.336	26.0567	126.593	4.85837	0.390099	-
ALAD	A0A8I3N580	Delta-aminolevulinic acid dehydratase	50	16	33	16	16	488.1	515.046	551.462	506.327	438.922	310.809	518.203	418.686	0.807958	0.218824	-
CDC37	A0A8I3PXI0	Hsp90 co-chaperone Cdc37	44	18	28	18	18	296.5	209.968	207.097	191.526	254.885	309.621	237.855	252.011	1.05951	0.769135	-
LOC119868838	A0A8I3S4Y6	Septin	50	14	26	14	14	297.5	394.974	305.99	310.393	323.052	309.226	332.821	314.223	0.944121	0.61255	-
DSTN	A0A8I3PCW0	ADF-H domain-containing protein	21	11	21	10	11	180.9	236.194	183.191	239.53	224.683	309.226	200.095	257.813	1.28845	0.151604	-
TNPO3	A0A8I3PA15	Transportin 3	27	19	24	4	19	320.2	320.245	310.771	303.372	256.438	309.094	317.072	289.634	0.913466	0.239177	-
NEDD8	A0A8I3N2C0	NEDD8	28	3	23	3	3	309.1	335.254	268.622	340.273	353.819	308.962	304.325	334.351	1.09866	0.27868	-
LOC480491	A0A8I3PHW7	GTP:AMP phosphotransferase AK3, mitochondrial	52	11	15	11	11	202.6	136.345	210.117	256.348	181.637	308.83	183.021	248.938	1.36017	0.218501	-
AK3	A0A8I3NX81	GTP:AMP phosphotransferase AK3, mitochondrial	52	11	15	11	11	202.6	136.345	210.117	256.348	181.637	308.83	183.021	248.938	1.36017	0.218501	-
DDX46	A0A8I3NKW4	ATP-dependent RNA helicase	26	24	25	24	24	269.1	224.345	203.826	236.591	179.097	308.566	232.424	241.418	1.0387	0.844637	-
RAB11B	A0A8I3N1M4	Uncharacterized protein	73	11	24	10	11	333.9	335.886	315.804	362.805	304.705	308.302	328.53	325.271	0.99008	0.882144	-
UGDH	A0A8I3RTL0	UDP-glucose 6-dehydrogenase	52	21	31	21	21	420.5	245.99	222.069	202.955	205.065	308.038	296.186	238.686	0.805865	0.478038	-
FAM120A	A0A8I3PJ65	Family with sequence similarity 120A	21	16	19	16	16	261.4	184.532	137.142	187.771	166.536	307.379	194.358	220.562	1.13482	0.669641	-
LOC100688858	A0A8I3ML61	RRM domain-containing protein	3	2	5	2	2	271.2	54.3484	78.6364	227.284	124.761	307.115	134.728	219.72	1.63084	0.385076	-
PRDX5	A0A8I3Q4L7	Peroxiredoxin-5	34	8	41	8	8	310.9	362.902	246.856	299.453	271.821	306.851	306.886	292.708	0.953802	0.720323	-
GNB2	A0A8I3ME07	G protein subunit beta 2	40	11	19	4	11	386.3	239.67	325.869	361.336	270.974	306.587	317.28	312.966	0.986403	0.936179	-
RALY	A0A8I3S9N2	RALY heterogeneous nuclear ribonucleoprotein	39	10	11	10	10	305.9	278.22	181.43	201.649	152.282	306.587	255.183	220.173	0.862803	0.586525	-
SF3A1	A0A8I3PDS4	Splicing factor 3a subunit 1	30	22	27	22	22	315.2	308.396	223.705	312.026	224.683	305.927	282.434	280.879	0.994495	0.971379	-
ACADSB	A0A8I3S4L4	Acyl-CoA dehydrogenase short/branched chain	20	10	12	10	10	187.3	97.7955	251.637	184.342	139.157	305.664	178.911	209.721	1.17221	0.668832	-
PTPA	A0A8I3PGH2	Serine/threonine-protein phosphatase 2A activator	36	10	24	10	10	240.4	352.633	241.068	345.334	299.201	305.268	278.034	316.601	1.13872	0.416241	-
NRDC	A0A8I3P8J4	Nardilysin convertase	23	26	32	26	26	389.4	365.272	488.93	248.184	313.314	304.74	414.534	288.746	0.696556	0.0594423	-
CCDC91	A0A8I3PRZ6	Coiled-coil domain containing 91	41	21	22	21	21	383.4	435.261	349.649	396.767	307.81	304.476	389.437	336.351	0.863686	0.249115	-
ACAD9	A0A8I3S4X5	Uncharacterized protein	36	20	23	20	20	325.3	216.92	415.578	341.579	299.06	304.212	319.266	314.95	0.986483	0.947737	-
APOC1	P56595	Apolipoprotein C-I	30	4	5	4	4	63.2	80.8906	75.3652	105.805	120.95	303.553	73.1519	176.769	2.41647	0.243984	-
DDX19A	A0A8I3MQ00	DEAD-box helicase 19B	47	19	20	2	19	306.9	259.577	274.284	289.82	259.684	303.157	280.254	284.22	1.01415	0.84487	-
AKR7A2	A0A8I3RRE1	Aldo-keto reductase family 7 like (gene/pseudogene)	47	14	29	14	14	321.8	315.031	329.141	299.943	286.216	302.761	321.991	296.307	0.920235	0.0187698	-
FMO5	A0A8I3N6C4	Flavin-containing monooxygenase	39	15	19	15	15	620.6	174.894	333.544	268.43	133.088	302.234	376.346	234.584	0.623319	0.396524	-
ANK1	A0A8I3N542	Ankyrin 1	9	17	19	12	17	30.4	52.2945	51.0822	54.8616	52.7835	301.838	44.5923	136.494	3.06094	0.381996	-
WDR54	A0A8I3P636	WD repeat domain 54	34	7	8	7	7	36	39.0234	45.043	45.2282	35.0008	301.838	40.0221	127.356	3.18213	0.422474	-
ALOX15	A0A8I3P5X5	Uncharacterized protein	28	14	14	14	14	47.1	54.0324	49.3208	70.3731	45.5858	301.442	50.1511	139.134	2.77429	0.388753	-
FUBP1	A0A8I3MQX9	Uncharacterized protein	18	13	15	8	13	247.7	121.652	95.9994	110.54	106.273	300.914	155.117	172.576	1.11255	0.837831	-
HSD17B2	A0A8I3P923	Hydroxysteroid 17-beta dehydrogenase 2	32	13	31	13	13	738.1	274.27	439.483	332.272	317.124	300.255	483.951	316.55	0.654096	0.34262	-
TDRD15	A0A8I3P9R2	Tudor domain containing 15	0	1	1	1	1	244.4	291.333	336.061	302.066	263.071	300.123	290.598	288.42	0.992505	0.9457	-
TRIM25	A0A8I3S0A8	Tripartite motif containing 25	31	18	25	18	18	420.9	411.563	150.982	396.114	359.323	299.991	327.815	351.809	1.0732	0.816498	-
CIB1	A0A8I3MYE4	Calcium and integrin binding 1	41	6	7	6	6	168.9	138.083	271.642	191.036	166.536	299.991	192.875	219.188	1.13642	0.671273	-
CHMP1A	A0A8I3ML44	Charged multivesicular body protein 1A	21	5	5	5	5	261.5	303.656	192.879	368.847	442.45	299.595	252.678	370.297	1.46549	0.0919387	-
SF3B2	A0A8I3NV69	Splicing factor 3b subunit 2	28	21	25	21	21	393.2	153.566	178.159	144.992	147.342	299.068	241.642	197.134	0.815811	0.655927	-
RBMS3	A0A8I3S6P4	RNA binding motif single stranded interacting protein 3	4	2	2	2	2	199.6	245.674	186.211	272.022	227.223	298.54	210.495	265.928	1.26335	0.115705	-
RCN1	A0A8I3Q2T3	Reticulocalbin 1	23	9	10	9	9	174.8	124.812	152.995	159.523	180.649	298.54	150.869	212.904	1.41119	0.285678	-
BPNT1	A0A8I3PZM9	3'(2'), 5'-bisphosphate nucleotidase 1	61	14	31	14	14	346.8	372.065	332.664	368.52	302.447	298.276	350.51	323.081	0.921746	0.361843	-
COTL1	A0A8I3RTP3	Coactosin like F-actin binding protein 1	48	13	17	13	13	342.4	589.617	285.23	313.169	201.96	297.88	405.749	271.003	0.667908	0.284016	-
DHDH	Q9TV68	Trans-1,2-dihydrobenzene-1,2-diol dehydrogenase	39	10	12	10	10	263.7	218.816	239.935	232.346	197.444	297.748	240.817	242.513	1.00704	0.961507	-
PHPT1	A0A8I3MSR7	14 kDa phosphohistidine phosphatase	66	9	18	9	9	398.9	233.983	346.629	213.569	226.517	297.616	326.504	245.901	0.753133	0.238714	-
ATP6V1C2	A0A8I3PSZ6	V-type proton ATPase subunit C	39	17	20	16	17	435.9	194.485	285.356	215.528	216.92	297.616	305.247	243.355	0.797239	0.480873	-
IARS1	A0A8I3M9Y6	isoleucine--tRNA ligase	32	35	39	35	35	331.5	370.959	289.256	310.23	304.423	296.957	330.572	303.87	0.919224	0.375094	-
RCC2	A0A8I3MWB8	Regulator of chromosome condensation 2	54	22	25	22	22	299.1	163.835	174.384	218.793	229.058	296.957	212.44	248.269	1.16866	0.522081	-
DNAJA1	A0A8I3P0A2	DnaJ heat shock protein family (Hsp40) member A1	28	8	12	8	8	239.7	238.09	215.527	250.959	207.182	296.429	231.106	251.524	1.08835	0.516558	-
CAB39	A0A8I3P922	Calcium binding protein 39	57	22	30	18	22	347.6	435.893	294.163	397.094	400.816	296.033	359.219	364.648	1.01511	0.924521	-
CYP2B11	P24460	Cytochrome P450 2B11	44	21	36	20	21	849.8	268.108	350.53	288.84	196.315	296.033	489.479	260.396	0.531986	0.333976	-
CYP2B6	A0A8I3MQJ9	Cytochrome P450 2B11	41	21	36	20	21	849.8	268.108	350.53	288.84	196.315	296.033	489.479	260.396	0.531986	0.333976	-
RDX	A0A8I3MN64	Radixin	48	34	80	18	34	261.2	249.15	185.456	214.712	174.722	296.033	231.935	228.489	0.985141	0.940165	-
MX1	Q9N0Y3	Interferon-induced GTP-binding protein Mx1	53	30	55	27	30	1456.7	307.764	442.629	250.796	198.714	295.638	735.697	248.383	0.337615	0.310881	-
RPL3	A0A8I3PMB8	Ribosomal protein L3	48	21	36	21	21	378.7	299.864	393.434	262.715	261.659	295.506	357.333	273.294	0.764815	0.0870079	-
HIP1R	A0A8I3S1K9	Huntingtin interacting protein 1 related	30	31	35	29	31	305.8	255.153	256.669	286.554	294.12	294.978	272.541	291.884	1.07097	0.364744	-
RSPH9	A0A8I3RVR9	Radial spoke head component 9	13	3	3	3	3	27.2	27.4902	27.1768	39.1869	28.0853	294.846	27.289	120.706	4.42325	0.395857	-
PARP1	A0A8I3N694	Poly [ADP-ribose] polymerase	18	16	16	16	16	110.9	208.546	111.978	179.117	134.923	294.714	143.808	202.918	1.41103	0.369996	-
CAPNS1	A0A8I3MV04	Calpain small subunit 1	53	10	28	10	10	443.5	397.028	343.861	424.035	315.431	294.45	394.796	344.639	0.872953	0.3729	-
DNAJB1	A0A8I3PMR7	DnaJ heat shock protein family (Hsp40) member B1	52	23	36	23	23	435.6	528.949	378.336	436.771	427.631	294.186	447.628	386.196	0.862761	0.389169	-
TRIM29	A0A8I3NQD2	Tripartite motif containing 29	31	24	36	24	24	611.5	608.892	607.073	645.604	587.816	294.054	609.155	509.158	0.835844	0.455212	-
LOC100684571	A0A8I3Q220	Uncharacterized protein	8	3	5	3	3	315.3	424.36	243.962	387.134	371.46	293.263	327.874	350.619	1.06937	0.728759	-
NADK2	A0A8I3MUL0	NAD kinase 2, mitochondrial	33	12	13	12	12	191.4	102.377	165.954	133.399	119.539	292.867	153.244	181.935	1.18723	0.674474	-
RPS25	A0A8I3RR71	40S ribosomal protein S25	37	5	7	4	5	124.2	212.812	165.954	220.916	256.155	292.603	167.655	256.558	1.53027	0.0565751	-
CNN2	A0A8I3S0Q3	Calponin	26	10	11	10	10	211.6	440.317	216.533	226.141	173.028	292.208	289.483	230.459	0.796104	0.531331	-
LOC106557771	A0A8I3S4A3	Ribosomal protein L32	31	5	10	5	5	186.8	224.187	184.827	156.911	163.431	290.756	198.605	203.7	1.02565	0.919563	-
LOC119880471	A0A8I3N8B3	Uncharacterized protein	34	5	10	5	5	186.8	224.187	184.827	156.911	163.431	290.756	198.605	203.7	1.02565	0.919563	-
MYO18A	A0A8I3NRI2	Uncharacterized protein	17	31	33	31	31	272.2	352.949	319.83	238.224	231.316	290.625	314.993	253.388	0.804425	0.112632	-
EIF4A2	A0A8I3PNE7	ATP-dependent RNA helicase	43	21	49	8	21	265.3	300.812	238.677	271.043	224.401	290.493	268.263	261.979	0.976573	0.825026	-
LOC100686930	A0A8I3S7B2	Uncharacterized protein	32	13	28	13	13	335	179.95	270.509	197.241	213.392	290.361	261.82	233.665	0.892463	0.63029	-
AZGP1	A0A8I3RR08	Alpha-2-glycoprotein 1, zinc-binding	54	17	37	17	17	310.8	513.466	917.844	445.424	423.679	289.965	580.704	386.356	0.665324	0.391212	-
EIF2S1	A0A8I3MV19	Eukaryotic translation initiation factor 2 subunit 1	65	21	32	21	21	220.4	254.047	225.97	293.575	311.761	289.701	233.472	298.346	1.27786	0.0096305	-
UBE3A	A0A8I3PCL5	Ubiquitin-protein ligase E3A	33	27	30	27	27	286.2	321.193	318.698	314.965	267.587	289.437	308.697	290.663	0.941581	0.368654	-
NAP1L1	A0A8I3MZS7	Nucleosome assembly protein 1 like 1	42	12	22	11	12	291.5	179.95	181.43	186.138	171.899	289.173	217.627	215.737	0.991316	0.972877	-
TTC38	A0A8I3N9Q0	Tetratricopeptide repeat protein 38	56	20	26	20	20	221.7	384.863	274.032	292.595	266.599	289.041	293.532	282.745	0.963253	0.84454	-
RPL18A	A0A8I3PRR7	60S ribosomal protein L18a	41	6	14	6	6	337.7	356.424	332.034	229.733	224.401	288.514	342.053	247.549	0.723716	0.032459	-
GATD3	A0A8I3S401	Glutamine amidotransferase class 1 domain containing 3	57	13	29	13	13	335.1	146.93	283.091	192.669	205.065	288.514	255.04	228.749	0.896914	0.706842	-
USP47	A0A8I3NWT7	Ubiquitin carboxyl-terminal hydrolase 47	30	31	34	31	31	271.5	304.13	272.774	274.145	246.699	288.118	282.801	269.654	0.953511	0.462843	-
UBE2L3	A0A8I3PW29	Uncharacterized protein	50	9	22	9	9	435.2	330.514	359.715	409.34	444.708	287.986	375.143	380.678	1.01475	0.927739	-
FHDC1	A0A8I3N512	FH2 domain containing 1	1	1	1	1	1	372.2	612.367	348.643	412.442	443.015	287.986	444.403	381.148	0.857661	0.557546	-
IPO7	A0A8I3NQH3	Importin 7	30	25	31	23	25	308	312.819	320.082	275.941	329.544	287.722	313.634	297.736	0.949311	0.432715	-
KLK10	A0A8I3P493	Kallikrein related peptidase 10	24	11	35	11	11	241.6	245.516	584.426	530.493	836.492	286.931	357.181	551.305	1.54349	0.38219	-
MATR3	A0A8I3PE29	Matrin 3	28	23	33	23	23	470.9	238.88	260.57	208.507	165.689	286.799	323.45	220.332	0.681193	0.301309	-
CNOT1	A0A8I3MIQ4	CCR4-NOT transcription complex subunit 1	18	35	38	2	35	245	231.771	225.97	215.038	206.053	286.271	234.247	235.787	1.00658	0.95769	-
CASP6	A0A8I3Q9U5	Caspase 6	36	18	24	18	18	343.5	313.451	267.238	361.499	319.1	285.348	308.063	321.982	1.04518	0.679168	-
DIS3L2	A0A8I3PTC4	DIS3-like exonuclease 2	26	22	24	22	22	272.9	319.929	356.443	277.574	292.426	285.348	316.424	285.116	0.901056	0.323938	-
LOC119868806	A0A8I3PYJ6	Ig-like domain-containing protein	6	1	2	1	1	125.4	150.406	307.626	222.549	258.272	285.084	194.477	255.302	1.31276	0.400757	-
LOC106558923	A0A8I3MG20	60S ribosomal protein L21	17	4	6	4	4	226.4	238.722	373.806	164.585	129.701	285.084	279.643	193.123	0.690606	0.264161	-
CHMP4C	A0A8I3NTI1	Charged multivesicular body protein 4C	10	3	4	3	3	260.2	184.058	143.936	110.54	121.374	284.82	196.065	172.244	0.878509	0.739673	-
CPNE1	A0A8I3S2Y1	Copine 1	37	13	20	13	13	403.4	117.544	152.366	199.037	174.863	284.292	224.437	219.397	0.977547	0.961979	-
CTPS2	A0A8I3QAX6	CTP synthase	39	18	24	14	18	461.3	292.913	276.297	274.145	264.764	283.501	343.503	274.137	0.798061	0.361202	-
LOC480784	A0A8I3PH35	Globin family profile domain-containing protein	90	15	301	3	15	25.1	31.1239	40.2619	48.9836	44.8801	283.501	32.1619	125.788	3.91109	0.356998	-
COBLL1	A0A8I3NXH5	Cordon-bleu WH2 repeat protein like 1	20	21	26	21	21	295.6	317.875	182.814	310.556	197.868	283.369	265.43	263.931	0.994353	0.979184	-
PLBD1	A0A8I3PKA9	Phospholipase B-like	32	17	30	17	17	307.7	218.026	326.247	323.782	421.139	283.105	283.991	342.675	1.20664	0.331427	-
CUL1	A0A8I3NDH1	Cullin 1	37	26	28	26	26	266.5	297.81	282.588	280.023	286.499	282.445	282.299	282.989	1.00244	0.946782	-
DPYSL3	A0A8I3PFJ6	Dihydropyrimidinase like 3	35	16	22	13	16	260.5	249.15	191.621	284.268	255.591	282.445	233.757	274.101	1.17259	0.190067	-
IKBKB	A0A8I3N4F2	IkappaB kinase	24	15	17	14	15	184.5	229.717	204.832	248.184	219.743	281.258	206.35	249.728	1.21022	0.126995	-
STK39	A0A8I3P5V1	non-specific serine/threonine protein kinase	25	16	24	14	16	289	368.432	235.783	317.251	266.458	281.126	297.738	288.278	0.968227	0.835984	-
DPYSL2	A0A8I3NP20	Dihydropyrimidinase like 2	49	22	30	18	22	246.5	287.699	222.447	197.404	178.674	280.994	252.215	219.024	0.868401	0.427841	-
PSMD9	A0A8I3PMA2	26S proteasome non-ATPase regulatory subunit 9	45	8	18	8	8	255.4	340.151	315.426	263.858	297.366	280.598	303.659	280.608	0.924087	0.464562	-
HNMT	A0A8I3NEH8	Histamine N-methyltransferase	17	4	4	4	4	184.4	168.417	164.319	161.483	280.995	280.598	172.379	241.025	1.39823	0.22447	-
ATP5IF1	A0A8I3NGS0	ATP synthase F1 subunit epsilon	36	5	13	5	5	284.2	141.875	201.435	149.563	164.843	280.335	209.17	198.247	0.947779	0.860663	-
CERT1	A0A8I3NG22	Ceramide transfer protein	25	18	19	18	18	314.4	353.107	274.158	272.022	207.606	279.279	313.888	252.969	0.805921	0.131667	-
LMO7	A0A8I3PV23	LIM domain 7	26	29	33	29	29	526.4	294.177	345.623	322.475	400.957	279.015	388.733	334.149	0.859585	0.539551	-
NAXD	A0A8I3PE42	ATP-dependent (S)-NAD(P)H-hydrate dehydratase	48	16	28	16	16	413.6	268.74	349.02	206.221	196.174	278.224	343.787	226.873	0.659924	0.0894839	-
TPP1	Q9XSB8	Tripeptidyl-peptidase 1	24	8	14	8	8	209.6	133.975	205.461	140.093	119.398	278.092	183.012	179.194	0.979139	0.949626	-
GDA	A0A8I3M9W6	Guanine deaminase	58	26	37	26	26	528	703.369	700.808	647.727	908.046	277.96	644.059	611.244	0.94905	0.877522	-
LOC102153461	A0A8I3RWR5	Uncharacterized protein	11	2	4	2	2	322.9	378.227	231.254	294.718	347.75	277.564	310.794	306.678	0.986756	0.936919	-
LOC100683335	A0A8I3P3J4	Uncharacterized protein	13	2	4	2	2	322.9	378.227	231.254	294.718	347.75	277.564	310.794	306.678	0.986756	0.936919	-
ACTR3B	A0A8I3NGR4	Uncharacterized protein	15	5	14	5	5	431.6	377.595	312.407	378.643	320.653	277.432	373.867	325.576	0.870833	0.347386	-
VPS4B	A0A8I3MPM5	vesicle-fusing ATPase	39	18	25	11	18	330.3	202.859	188.476	195.771	231.598	277.168	240.545	234.846	0.976309	0.917813	-
HP1BP3	A0A8I3N1I6	Heterochromatin protein 1 binding protein 3	24	14	15	14	14	309.7	128.13	191.118	125.888	161.738	277.037	209.649	188.221	0.897789	0.775397	-
STRAP	A0A8I3PA92	Serine/threonine kinase receptor associated protein	52	15	25	15	15	259.5	262.105	289.508	257.98	276.055	276.509	270.371	270.181	0.999299	0.987642	-
SPTA1	A0A8I3P3Z7	Spectrin alpha, erythrocytic 1	11	21	21	21	21	50.3	63.5118	62.0284	73.802	67.7435	275.585	58.6134	139.044	2.37222	0.360011	-
ACYP2	A0A8I3NAV5	Acylphosphatase	24	3	5	3	3	207.2	371.117	94.9928	206.058	253.05	275.453	224.437	244.854	1.09097	0.82574	-
DDAH2	A0A8I3NHQ9	dimethylargininase	50	11	14	11	11	209.2	316.453	224.46	165.075	131.394	275.453	250.038	190.641	0.762449	0.343898	-
DLST	A0A8I3NVG0	Dihydrolipoyllysine-residue succinyltransferase component of 2-oxoglutarate dehydrogenase complex, mitochondrial	22	13	18	13	13	259.7	161.939	233.015	211.283	199.561	275.322	218.218	228.722	1.04813	0.793828	-
BAIAP2L1	A0A8I3NLZ0	BAR/IMD domain containing adaptor protein 2 like 1	29	16	16	16	16	197	247.096	213.891	236.101	169.359	274.794	219.329	226.751	1.03384	0.842379	-
PKM	A0A8I3PG67	Pyruvate kinase	79	47	260	4	47	468.7	212.812	316.433	539.31	439.769	274.398	332.648	417.825	1.25606	0.471393	-
FABP4	A0A8I3NQN1	Uncharacterized protein	52	8	21	7	8	238.7	127.972	168.722	358.887	427.772	274.002	178.465	353.554	1.98109	0.0379353	UP
ANP32B	A0A8I3MUS3	Acidic leucine-rich nuclear phosphoprotein 32 family member	33	10	22	5	10	268.6	260.683	288.879	179.933	134.499	273.87	272.721	196.101	0.719054	0.199023	-
AKR1E2	A0A8I3MGX2	Aldo-keto reductase family 1 member E2	34	13	20	12	13	248.8	338.888	334.299	300.596	357.912	273.607	307.329	310.705	1.01098	0.934309	-
RANBP2	A0A8I3RVQ7	RAN binding protein 2	18	41	42	41	41	384.9	287.857	290.514	291.616	240.772	273.079	321.09	268.489	0.836178	0.237282	-
EIF2S2	A0A8I3PME6	Uncharacterized protein	49	20	27	20	20	246.9	313.451	149.346	396.441	422.692	272.815	236.566	363.982	1.53861	0.127409	-
CARHSP1	A0A8I3NNQ1	Calcium regulated heat stable protein 1	24	3	5	3	3	57.1	117.544	121.415	135.195	239.925	272.551	98.6863	215.89	2.18764	0.0870356	-
FBP1	A0A8I3MZ42	fructose-bisphosphatase	64	25	43	24	25	430.7	511.728	444.516	381.582	347.186	272.419	462.315	333.729	0.721866	0.0374131	-
SERPIND1	A0A8I3PPY1	Serpin family D member 1	23	10	13	10	10	67.6	133.027	104.429	92.579	165.831	272.419	101.685	176.943	1.7401	0.284174	-
SRSF1	A0A8I3P1V7	Serine/arginine-rich splicing factor 1	40	10	20	10	10	202	104.431	123.679	163.442	135.064	272.419	143.37	190.308	1.32739	0.417969	-
TSTD1	A0A8I3QWT5	Thiosulfate sulfurtransferase like domain containing 1	71	6	11	6	6	558.5	299.706	203.071	332.435	349.02	272.287	353.759	317.914	0.898675	0.770322	-
RPL10A	A0A8I3MZL8	Ribosomal protein	52	13	33	13	13	318.5	411.247	335.054	320.026	284.382	272.155	354.934	292.188	0.823218	0.145982	-
ACP1	A0A8I3P1H9	Low molecular weight phosphotyrosine protein phosphatase	70	8	12	2	8	401.9	109.013	264.848	153.155	167.524	272.155	258.587	197.612	0.764199	0.560827	-
ETF1	A0A8I3PCV3	Eukaryotic peptide chain release factor subunit 1	62	24	36	24	24	251.7	321.667	304.858	339.62	315.854	271.232	292.741	308.902	1.0552	0.608254	-
JCHAIN	A0A8I3RW25	Joining chain of multimeric IgA and IgM	70	10	47	10	10	192.1	243.778	1653.25	807.087	502.008	271.1	696.377	526.732	0.756389	0.763114	-
AACS	A0A8I3QY70	Acetoacetyl-CoA synthetase	28	19	25	19	19	273.2	333.99	326.498	318.393	437.228	271.1	311.229	342.241	1.09964	0.605498	-
PSMB7	E2RPC6	Proteasome subunit beta	40	12	19	12	12	368	398.134	335.683	401.502	332.931	271.1	367.272	335.178	0.912614	0.50036	-
TACC2	A0A8I3PB73	Transforming acidic coiled-coil containing protein 2	27	54	65	51	54	471.9	352.475	361.853	367.377	421.845	270.836	395.409	353.353	0.893638	0.512524	-
LOC612266	A0A8I3N7S9	F-actin-capping protein subunit alpha	17	3	5	2	3	306.7	370.17	324.737	337.987	346.903	270.44	333.869	318.444	0.953798	0.64264	-
CASP7	A0A8I3Q473	Caspase 7	39	11	14	11	11	251.4	247.728	277.933	224.018	235.691	270.177	259.02	243.295	0.939291	0.408804	-
EIF3I	A0A8I3MMU7	Eukaryotic translation initiation factor 3 subunit I	60	16	29	16	16	330.8	329.566	378.084	308.923	363.416	269.913	346.15	314.084	0.907364	0.378196	-
STUB1	A0A8I3PT83	STIP1 homology and U-box containing protein 1	65	20	33	20	20	317.9	203.649	276.171	186.464	192.928	269.913	265.907	216.435	0.813951	0.314923	-
CTNND1	A0A8I3P8H1	Catenin delta 1	28	23	27	22	23	195.5	112.963	157.525	223.365	154.54	269.385	155.329	215.763	1.38907	0.221824	-
OPTN	A0A8I3MA34	Optineurin	50	26	30	26	26	379.7	369.696	343.358	297.494	310.209	269.121	364.251	292.275	0.802399	0.0118292	-
RPS19	A0A8I3MMC1	Small ribosomal subunit protein eS19	65	13	18	13	13	123.1	308.08	101.032	114.785	90.0425	268.989	177.404	157.939	0.890279	0.832824	-
EIF4A3	A0A8I3NS82	Eukaryotic translation initiation factor 4A3	49	21	32	17	21	336.8	267.792	282.462	272.512	237.526	268.725	295.685	259.588	0.877921	0.22464	-
RRAD	A0A8I3NBE9	GTP-binding protein	10	2	2	2	2	52.6	53.0845	64.2932	81.4761	72.2598	268.725	56.6592	140.82	2.48539	0.318952	-
XPOT	A0A8I3NIP3	Exportin-T	28	22	28	22	22	282.5	336.36	279.694	270.716	242.324	268.594	299.518	260.545	0.86988	0.156867	-
LOC119863969	A0A8I3N4A3	D-3-phosphoglycerate dehydrogenase	41	19	27	19	19	352.4	348.209	201.938	306.148	384.304	268.198	300.849	319.55	1.06216	0.773165	-
LOC119863976	A0A8I3N9D6	D-3-phosphoglycerate dehydrogenase	37	18	26	18	18	352.4	348.209	201.938	306.148	384.304	268.198	300.849	319.55	1.06216	0.773165	-
EIF5	A0A8I3S343	Eukaryotic translation initiation factor 5	37	17	23	17	17	264.9	330.356	235.406	412.115	413.236	268.066	276.887	364.472	1.31632	0.208324	-
GOLGA3	A0A8I3S9G9	Golgin A3	22	26	26	26	26	250.5	286.593	226.599	171.279	188.129	267.934	254.564	209.114	0.821461	0.273881	-
SMARCC2	A0A8I3N6P6	SWI/SNF related, matrix associated, actin dependent regulator of chromatin subfamily c member 2	21	22	25	16	22	198	171.261	169.351	148.094	128.572	267.802	179.537	181.489	1.01087	0.968703	-
ATOX1	Q9TT99	Copper transport protein ATOX1	85	5	20	5	5	272.1	295.282	244.717	285.738	288.898	267.67	270.7	280.769	1.0372	0.577842	-
ASL	A0A8I3S060	Argininosuccinate lyase	53	21	28	21	21	167.4	461.961	243.333	210.956	234.985	267.67	290.898	237.871	0.817711	0.61131	-
NBAS	A0A8I3Q7F8	NBAS subunit of NRZ tethering complex	1	2	2	2	2	73	54.3484	69.5775	88.9869	78.0462	267.538	65.642	144.857	2.20678	0.325892	-
SEPTIN7	A0A8I3Q1M0	Septin	47	21	32	20	21	278.5	323.721	277.429	299.29	342.528	267.274	293.217	303.031	1.03347	0.733037	-
RPL27A	E2RI34	Large ribosomal subunit protein uL15	39	7	8	7	7	367.8	190.061	304.732	102.376	130.689	266.879	287.531	166.648	0.579581	0.171722	-
BAG5	A0A8I3PFS9	BAG cochaperone 5	36	14	17	14	14	301.6	324.511	318.194	334.395	324.604	266.747	314.768	308.582	0.980346	0.802483	-
EIF3E	A0A8I3NCA6	Eukaryotic translation initiation factor 3 subunit E	44	17	27	1	17	292.2	320.719	260.821	277.737	176.415	266.219	291.247	240.124	0.824469	0.252707	-
CRMP1	A0A8I3MRF4	Collapsin response mediator protein 1	2	1	1	1	1	190.6	254.837	172.371	154.625	135.769	266.087	205.936	185.494	0.900735	0.694748	-
CHORDC1	A0A8I3PLN3	Cysteine and histidine rich domain containing 1	52	11	15	11	11	152.4	220.553	130.222	171.116	153.975	265.955	167.725	197.016	1.17463	0.545553	-
API5	A0A8I3S176	Apoptosis inhibitor 5	31	13	16	13	13	292.1	169.365	172.749	175.688	157.786	265.559	211.404	199.678	0.94453	0.834105	-
CUTA	A0A8I3PMV7	CutA divalent cation tolerance homolog	45	5	11	5	5	225.1	257.049	213.891	208.017	241.336	265.427	232.013	238.26	1.02692	0.782531	-
DNAJB11	P81999	DnaJ homolog subfamily B member 11	31	9	12	9	9	289.8	222.765	303.348	234.142	325.31	265.295	271.971	274.916	1.01083	0.939686	-
AIMP2	A0A8I3NEL4	Aminoacyl tRNA synthase complex-interacting multifunctional protein 2	39	10	16	10	10	334.6	238.248	197.157	212.752	196.88	265.295	256.669	224.976	0.876523	0.538203	-
MX2	Q9N0Y2	Interferon-induced GTP-binding protein Mx2	40	25	34	22	25	467	94.6357	279.946	248.837	166.96	265.032	280.527	226.943	0.808986	0.672947	-
LOC607206	A0A8I3NWU2	IF rod domain-containing protein	9	4	6	3	4	427.8	380.439	292.402	251.286	301.882	264.636	366.88	272.601	0.743025	0.127807	-
GCC2	A0A8I3N8N1	GRIP and coiled-coil domain containing 2	20	28	31	28	28	289.4	258.629	200.429	238.387	199.985	264.504	249.486	234.292	0.939099	0.663205	-
LAMP2	A0A8I3S2Z8	Lysosomal associated membrane protein 2	16	7	10	1	7	447.5	191.325	393.937	472.365	243.736	264.372	344.254	326.824	0.949369	0.878363	-
EIF5B	A0A8I3PAX1	Eukaryotic translation initiation factor 5B	24	25	27	25	25	166.3	216.92	191.244	259.287	264.059	263.712	191.488	262.353	1.37007	0.0386931	-
UBE2L6	A0A8I3PAX4	Ubiquitin conjugating enzyme E2 L6	87	10	20	10	10	313.8	271.11	277.681	229.896	217.626	263.449	287.53	236.99	0.824227	0.0570286	-
NQO2	A0A8I3NXH1	N-ribosyldihydronicotinamide:quinone reductase 2	58	14	19	14	14	176.2	415.355	372.548	407.38	426.079	263.317	321.368	365.592	1.13761	0.651091	-
CC2D1A	A0A8I3PY22	Coiled-coil and C2 domain containing 1A	24	19	20	18	19	302.7	268.582	138.652	233.162	296.943	262.657	236.645	264.254	1.11667	0.646025	-
ERAP1	A0A8I3MQ05	Aminopeptidase	31	26	26	26	26	422.6	246.622	414.068	321.986	296.519	262.657	361.097	293.721	0.813413	0.361517	-
STARD10	A0A8I3NB89	StAR related lipid transfer domain containing 10	38	9	12	9	9	201.8	307.448	234.148	155.441	163.855	262.657	247.799	193.984	0.782831	0.312042	-
AP3B1	A0A8I3N8P6	AP-3 complex subunit beta	22	23	27	23	23	173.8	246.938	180.298	184.178	137.322	262.261	200.345	194.587	0.97126	0.901665	-
RPS15	A0A8I3NGP8	40S ribosomal protein S15	26	4	9	4	4	113	211.548	190.866	129.643	100.204	262.261	171.805	164.036	0.954782	0.901545	-
PDLIM1	A0A8I3S614	PDZ and LIM domain 1	53	14	19	14	14	216.5	285.645	152.995	207.364	180.932	262.129	218.38	216.808	0.992803	0.974204	-
TAX1BP1	A0A8I3RZI9	Tax1 binding protein 1	20	21	22	21	21	273.8	316.611	262.457	335.048	338.577	261.997	284.289	311.874	1.09703	0.416051	-
RAN	A0A8I3QK97	GTP-binding nuclear protein Ran	23	10	24	10	10	343.8	465.911	317.188	344.192	254.744	261.338	375.633	286.758	0.763399	0.188873	-
S100A13	A0A8I3MJC0	S100 calcium binding protein A13	47	5	9	5	5	176.2	243.462	183.821	216.344	242.889	260.81	201.161	240.014	1.19315	0.208127	-
PDHB	A0A8I3P4C2	Pyruvate dehydrogenase E1 component subunit beta	36	11	19	11	11	286.1	136.977	333.041	176.341	153.411	260.546	252.039	196.766	0.780696	0.470792	-
PFAS	A0A8I3RP14	phosphoribosylformylglycinamidine synthase	16	17	23	17	17	277.9	293.071	293.786	276.431	247.405	260.414	288.252	261.417	0.906903	0.0646565	-
RO60	A0A8I3PKJ0	Ro60, Y RNA binding protein	39	17	33	17	17	396.3	354.529	376.7	406.401	365.251	260.282	375.843	343.978	0.915217	0.544809	-
PCCB	A0A8I3S1S6	Propionyl-CoA carboxylase subunit beta	36	16	18	16	16	242.3	123.706	325.744	156.094	167.383	259.887	230.583	194.455	0.843317	0.626598	-
GLO1	A0A8I3NIZ1	Lactoylglutathione lyase	66	13	38	13	13	382.7	615.685	537.244	623.561	654.572	259.623	511.876	512.585	1.00139	0.996376	-
ERO1A	A0A8I3MR85	Endoplasmic reticulum oxidoreductase 1 alpha	38	19	24	19	19	320.7	156.252	277.304	275.288	356.783	259.491	251.418	297.187	1.18204	0.480539	-
EPB41L2	A0A8I3ML23	Erythrocyte membrane protein band 4.1 like 2	14	12	13	11	12	201	248.992	179.669	220.263	130.83	259.491	209.887	203.528	0.969704	0.892215	-
RPS23	A0A8I3PLH2	Small ribosomal subunit protein uS12	35	7	10	7	7	198.5	406.349	332.789	334.395	257.143	259.359	312.546	283.632	0.907489	0.693954	-
CYFIP1	A0A8I3NVM9	Cytoplasmic FMR1-interacting protein	34	37	44	37	37	243.6	321.193	232.89	272.022	231.457	258.172	265.894	253.884	0.95483	0.720625	-
RPS18	Q5TJE9	Small ribosomal subunit protein uS13	53	11	15	11	11	204.9	306.5	228.989	240.51	198.997	258.172	246.796	232.559	0.942313	0.712401	-
COPS3	A0A8I3PRS1	COP9 signalosome subunit 3	38	13	19	13	13	276.6	298.758	285.356	275.941	311.62	258.04	286.905	281.867	0.982441	0.788829	-
GIT1	A0A8I3NJR6	GIT ArfGAP 1	16	10	11	8	10	181.2	236.352	158.909	239.203	224.118	257.776	192.154	240.366	1.2509	0.159666	-
A2ML1	A0A8I3Q5V2	Alpha-2-macroglobulin like 1	26	30	36	30	30	362.9	307.29	677.28	430.893	601.365	256.984	449.157	429.747	0.956787	0.904777	-
LOC608703	A0A8I3QED9	Uncharacterized protein	23	5	5	5	5	183.3	149.616	132.361	137.644	91.7361	256.984	155.092	162.121	1.04532	0.90213	-
RPL26	E2QUE7	Ribosomal protein L26	29	7	8	7	7	199.8	125.602	132.361	121.479	91.7361	256.984	152.588	156.733	1.02717	0.946004	-
CAPZA1	A0A8I3NF50	F-actin-capping protein subunit alpha	74	15	34	12	15	273	300.812	283.343	321.659	363.416	256.721	285.718	313.932	1.09875	0.462229	-
LOC403934	A0A8I3MRX7	Cell division control protein 42 homolog	49	10	30	5	10	331.7	342.363	272.271	368.683	314.725	256.589	315.445	313.332	0.993304	0.959776	-
CDC42	P60952	Cell division control protein 42 homolog	49	10	30	5	10	331.7	342.363	272.271	368.683	314.725	256.589	315.445	313.332	0.993304	0.959776	-
SEPTIN9	A0A8I3NSG0	Septin 9	32	16	19	16	16	334.8	303.814	269.754	262.226	189.823	256.457	302.789	236.168	0.779976	0.0925735	-
PCMT1	A0A8I3PFU3	Protein-L-isoaspartate (D-aspartate) O-methyltransferase	40	14	27	14	14	277.6	312.819	329.77	319.7	393.195	256.325	306.73	323.073	1.05328	0.729488	-
MAP2K2	Q1HG70	Dual specificity mitogen-activated protein kinase kinase 2	31	16	25	11	16	299.9	266.528	245.597	330.313	318.395	255.929	270.675	301.545	1.11405	0.338986	-
RPL7A	A0A8I3NP99	60S ribosomal protein L7a	44	18	24	18	18	340.7	528.001	379.845	270.879	236.538	255.929	416.182	254.449	0.611388	0.101008	-
RPS16	A0A8I3N9D0	Ribosomal protein S16	68	12	25	12	12	217.5	382.177	280.575	196.261	246.135	255.665	293.417	232.687	0.793025	0.334763	-
NSFL1C	A0A8I3NXH4	NSFL1 cofactor p47	58	20	38	20	20	301.4	388.022	266.483	289.33	365.392	255.269	318.635	303.33	0.951968	0.768866	-
LOC119868036	A0A8I3QGD6	Ubiquitin conjugating enzyme E2 V2	58	8	18	3	8	278.7	313.293	264.093	290.146	359.746	255.269	285.362	301.721	1.05733	0.664818	-
LIMA1	A0A8I3PA03	LIM domain and actin binding 1	22	17	20	16	17	284.7	280.273	181.933	236.917	174.157	255.269	248.969	222.115	0.892138	0.556488	-
CCAR1	A0A8I3MTP6	Cell division cycle and apoptosis regulator 1	13	15	18	15	15	167.4	149.774	163.564	147.931	119.963	255.137	160.246	174.343	1.08797	0.765726	-
NDEL1	A0A8I3MLQ4	NudE neurodevelopment protein 1 like 1	5	2	2	2	2	375.9	337.308	347.133	357.254	212.969	255.006	353.447	275.076	0.778267	0.20324	-
NDE1	A0A8I3NA04	NudE neurodevelopment protein 1	2	1	1	1	1	375.9	337.308	347.133	357.254	212.969	255.006	353.447	275.076	0.778267	0.20324	-
AHSA1	A0A8I3N859	Activator of HSP90 ATPase activity 1	42	11	13	11	11	211.7	173.157	152.743	112.172	178.109	255.006	179.2	181.762	1.0143	0.95833	-
SNX1	A0A8I3PIQ9	Sorting nexin-1	40	21	26	19	21	325.1	374.435	268.37	254.878	274.926	254.874	322.635	261.559	0.810696	0.179702	-
LOC608876	A0A8I3PSC9	Small ribosomal subunit protein uS2	16	7	14	6	7	269.8	264.317	253.272	239.04	216.497	254.61	262.463	236.716	0.901901	0.13131	-
SAMD9L	A0A8I3NLG4	Sterile alpha motif domain containing 9 like	30	43	47	43	43	377.3	454.536	319.327	342.395	376.965	254.346	383.721	324.569	0.845846	0.331476	-
SUPT5H	A0A8I3MSR1	Transcription elongation factor SPT5	13	12	13	12	12	256.6	218.184	198.919	193.322	146.919	253.818	224.567	198.02	0.881783	0.504872	-
ATP6V1B1	A0A8I3PUY9	Vacuolar proton pump subunit B	72	24	54	17	24	584	336.834	411.552	181.239	199.561	253.554	444.128	211.452	0.476105	0.0759998	-
EML2	A0A8I3NAF2	EMAP like 2	26	18	27	18	18	339.1	303.024	283.594	339.946	414.506	253.027	308.573	335.826	1.08832	0.627007	-
PDIA6	A0A8I3SAL0	Protein disulfide-isomerase A6	52	18	32	18	18	301.1	202.543	318.32	256.674	274.644	252.895	273.988	261.404	0.954073	0.762405	-
IPO9	A0A8I3NYG3	Importin 9	19	17	18	17	17	262.5	311.239	220.811	242.469	221.013	252.763	264.85	238.748	0.901447	0.428568	-
AIDA	A0A8I3Q3P5	Axin interactor, dorsalization associated	25	6	8	6	6	178.8	159.253	89.5826	159.197	134.64	252.631	142.545	182.156	1.27788	0.431959	-
GTF2I	A0A8I3RRX6	General transcription factor IIi	14	12	12	12	12	180	174.894	125.692	130.623	99.6395	252.499	160.196	160.92	1.00452	0.989445	-
DNAH5	A0A8I3P9V3	Dynein axonemal heavy chain 5	5	21	21	20	21	59.4	48.8188	66.5579	106.948	76.0704	252.235	58.2589	145.084	2.49034	0.250325	-
YWHAH	A0A8I3S659	Tyrosine 3-monooxygenase/tryptophan 5-monooxygenase activation protein eta	69	21	70	16	21	389.9	363.85	342.352	348.763	351.984	252.103	365.367	317.617	0.869309	0.281386	-
GLA	A0A8I3PAY1	Alpha-galactosidase	30	10	13	10	10	328.8	281.853	335.18	260.919	210.852	252.103	315.278	241.291	0.76533	0.0319498	-
ENTPD5	A0A8I3NSC1	Ectonucleoside triphosphate diphosphohydrolase 5 (inactive)	33	11	18	11	11	185.6	118.808	227.857	147.931	148.895	252.103	177.422	182.976	1.03131	0.91153	-
APRT	A0A8I3MH54	Adenine phosphoribosyltransferase	86	13	33	13	13	424.8	579.822	308.381	443.955	553.804	251.839	437.667	416.533	0.95171	0.866875	-
LOC106559922	A0A8I3NGK2	40S ribosomal protein S15a	25	5	6	5	5	151.3	229.085	129.97	191.852	158.351	251.707	170.118	200.637	1.1794	0.494964	-
SYNCRIP	A0A8I3NM71	Synaptotagmin binding cytoplasmic RNA interacting protein	48	22	35	18	22	170.9	97.3216	103.926	229.243	190.388	251.312	124.049	223.648	1.80289	0.0310428	UP
COPS7A	A0A8I3PVM0	COP9 signalosome subunit 7A	39	10	13	2	10	218	251.203	220.811	199.69	191.517	251.18	230.005	214.129	0.930975	0.510889	-
QDPR	A0A8I3MGQ6	Quinoid dihydropteridine reductase	50	8	16	8	8	91	115.648	104.178	152.502	151.153	251.18	103.609	184.945	1.78503	0.127724	-
SH3BGRL3	A0A8I3NHK0	SH3 domain binding glutamate rich protein like 3	59	7	16	7	7	295.2	396.712	299.699	319.047	443.015	250.784	330.537	337.615	1.02141	0.920039	-
DDX39B	Q5WR10	Spliceosome RNA helicase DDX39B	45	19	43	6	19	194.8	141.875	165.451	192.016	153.552	250.652	167.375	198.74	1.18739	0.39902	-
RTCB	A0A8I3N8Q9	RNA-splicing ligase RtcB homolog	45	21	24	10	21	259	149.458	142.175	154.788	128.148	250.256	183.544	177.731	0.968327	0.91784	-
CHMP3	A0A8I3NDI3	Charged multivesicular body protein 3	18	6	6	6	6	186.7	232.877	107.197	234.632	246.276	250.124	175.591	243.677	1.38775	0.203125	-
CANX	A0A8I3NJB1	Calnexin	35	18	29	18	18	405.1	178.212	296.805	265.328	261.942	249.992	293.373	259.087	0.883134	0.653287	-
PDCD5	A0A8I3MIF7	Programmed cell death 5	54	6	10	6	6	267.6	268.582	173.503	308.597	328.133	249.861	236.562	295.53	1.24927	0.213839	-
BAG6	A0A8I3NGY9	Large proline-rich protein BAG6	15	15	17	15	15	225.1	228.769	219.427	246.714	237.102	248.937	224.432	244.251	1.08831	0.0141654	-
LY6D	A0A8I3P2E2	Uncharacterized protein	27	3	5	3	3	280.8	253.099	465.779	679.076	815.886	248.805	333.226	581.256	1.74433	0.282017	-
PDCD6	A0A8I3NQR6	Programmed cell death 6	54	10	13	10	10	176.3	168.417	132.361	186.464	172.182	248.805	159.026	202.484	1.27327	0.202139	-
APEH	A0A8I3PMB7	Acylamino-acid-releasing enzyme	29	18	25	18	18	235.7	286.593	241.319	254.878	274.503	248.673	254.538	259.351	1.01891	0.805975	-
DNAJA2	A0A8I3MMT0	Uncharacterized protein	35	15	34	15	15	263	315.979	233.519	305.168	264.482	248.541	270.833	272.73	1.00701	0.952025	-
CCT6B	A0A8I3NGU3	Chaperonin containing TCP1 subunit 6B	21	9	23	9	9	229.9	243.62	247.988	235.121	201.255	248.409	240.503	228.262	0.949104	0.484281	-
GP2	A0A8I3RW46	Glycoprotein 2	35	16	22	16	16	127.4	151.038	357.45	725.937	813.346	248.146	211.963	595.81	2.81092	0.148102	-
ACTR1A	P61162	Alpha-centractin	57	18	34	12	18	388.1	428.942	377.203	253.898	226.941	248.146	398.082	242.995	0.610415	0.00311903	Down
DNPEP	A0A8I3QAI6	Aspartyl aminopeptidase	39	14	28	14	14	260.7	356.74	327.882	271.043	257.425	248.014	315.108	258.827	0.821393	0.181225	-
PDAP1	A0A8I3MQ69	PDGFA associated protein 1	26	6	9	6	6	177.5	131.289	96.1252	253.245	308.657	247.618	134.971	269.84	1.99924	0.0125218	UP
GNPDA2	A0A8I3P1K1	Glucosamine-6-phosphate isomerase	47	13	27	9	13	258.2	368.906	241.068	178.3	271.539	246.958	289.391	232.266	0.802602	0.314094	-
ENAH	A0A8I3RVZ1	ENAH actin regulator	17	14	20	14	14	195.4	139.821	188.476	142.706	203.654	246.958	174.566	197.773	1.13294	0.551169	-
MPST	A0A8I3N772	Mercaptopyruvate sulfurtransferase	62	14	27	14	14	368.5	205.544	291.018	217.651	170.488	246.563	288.354	211.567	0.733706	0.241109	-
RAB11A	P62490	Ras-related protein Rab-11A	50	10	23	9	10	316.9	296.23	271.138	350.233	304.705	246.431	294.756	300.456	1.01934	0.874139	-
VPS13C	A0A8I3S388	Vacuolar protein sorting 13 homolog C	12	35	35	35	35	194.2	244.726	245.094	228.753	214.38	246.299	228.007	229.811	1.00791	0.931102	-
ITIH2	A0A8I3RRH5	Inter-alpha-trypsin inhibitor heavy chain 2	25	20	22	20	20	65.7	135.239	105.939	124.908	171.052	246.299	102.293	180.753	1.76702	0.144525	-
CRYBG1	A0A8I3N4G4	Crystallin beta-gamma domain containing 1	16	27	32	27	27	308.7	352.791	303.222	523.472	333.496	246.035	321.571	367.667	1.14335	0.63255	-
KLK1	A0A8I3P0S2	Kallikrein 1	37	10	54	9	10	314.1	421.2	1084.05	888.563	686.891	245.903	606.45	607.119	1.0011	0.998369	-
LOC119864697	A0A8I3MZC4	Large ribosomal subunit protein eL20	38	5	12	5	5	337.3	353.897	335.306	246.714	234.139	245.903	342.167	242.252	0.707992	0.000313884	-
DNAL1	A0A8I3RZW0	Dynein axonemal light chain 1	35	5	5	5	5	56.6	68.5675	53.4728	64.4951	38.1057	245.771	59.5467	116.124	1.95013	0.477585	-
RBM47	A0A8I3MUW0	RNA-binding protein 47	26	15	17	15	15	222.9	123.232	121.918	146.298	123.773	245.639	156.017	171.903	1.10183	0.767663	-
GMPR	A0A8I3PQD8	GMP reductase	39	12	22	8	12	305.6	288.015	267.616	220.753	149.318	245.507	287.077	205.193	0.714766	0.090462	-
PPP3CA	A0A8I3Q531	Serine/threonine-protein phosphatase	45	17	27	12	17	345.4	484.554	355.563	325.904	353.254	245.375	395.172	308.178	0.779858	0.197458	-
CBR3	A0A8I3PRW1	Carbonyl reductase (NADPH)	53	13	23	10	13	326.2	210.442	202.064	234.468	283.817	245.243	246.235	254.51	1.0336	0.860947	-
NAA11	A0A8I3P5T4	N-terminal amino-acid N(alpha)-acetyltransferase NatA	17	3	4	3	3	192.8	255.627	236.035	228.917	277.043	245.111	228.154	250.357	1.09732	0.398693	-
LOC491817	A0A8I3PHU2	K Homology domain-containing protein	48	11	26	7	11	326.6	296.23	235.783	211.936	180.649	245.111	286.205	212.566	0.742705	0.0943693	-
GSDMD	A0A8I3NWY6	Gasdermin D	19	8	8	8	8	313.1	262.421	280.826	240.02	216.497	244.979	285.449	233.832	0.819173	0.0521495	-
DECR1	A0A8I3PAA6	2,4-dienoyl-CoA reductase 1	43	14	18	14	14	319.8	138.715	368.27	142.706	161.455	244.979	275.595	183.047	0.664188	0.319708	-
LOC106559170	A0A8I3MRW7	40S ribosomal protein SA	20	4	12	3	4	291.9	285.013	279.694	267.287	226.517	244.848	285.536	246.217	0.8623	0.0689188	-
RABGGTA	A0A8I3N0I7	Geranylgeranyl transferase type-2 subunit alpha	38	21	22	21	21	197.7	218.658	218.169	249.327	239.925	244.716	211.509	244.656	1.15672	0.0280195	-
BPIFA1	A0A8I3PJK7	BPI fold containing family A member 1	20	3	27	3	3	125.4	318.507	186.84	185.485	356.077	244.452	210.249	262.004	1.24616	0.532858	-
TPK1	A0A8I3NER7	Thiamine pyrophosphokinase	21	5	8	5	5	239.5	284.065	249.498	261.736	250.933	244.32	257.688	252.33	0.979208	0.738908	-
OXCT1	A0A8I3MS52	Succinyl-CoA:3-ketoacid-coenzyme A transferase	42	17	29	17	17	349	160.833	413.313	185.648	197.303	244.32	307.715	209.09	0.679492	0.321672	-
COPG2	A0A8I3NXM1	Coatomer subunit gamma	38	27	38	23	27	265.7	276.324	252.895	270.39	203.231	244.188	264.973	239.269	0.902996	0.318773	-
UBXN10	A0A8I3MPR2	UBX domain protein 10	5	1	1	1	1	20.2	18.1688	18.8727	28.4105	29.4967	244.188	19.0805	100.698	5.27755	0.373213	-
MCCC2	A0A8I3MA32	methylcrotonoyl-CoA carboxylase	39	17	22	17	17	337.1	148.194	283.972	202.466	230.751	243.924	256.422	225.714	0.880243	0.642946	-
DIP2B	A0A8I3NX30	Disco interacting protein 2 homolog B	27	31	33	28	31	223.6	236.036	208.103	239.53	241.336	243.66	222.58	241.509	1.08504	0.141075	-
TMOD2	A0A8I3PUE6	Tropomodulin 3	59	19	28	17	19	246.2	370.643	385.256	444.935	450.777	243.396	334.033	379.703	1.13672	0.608577	-
PPM1G	A0A8I3N2G1	Protein phosphatase, Mg2+/Mn2+ dependent 1G	26	10	11	10	10	170	170.313	167.338	166.381	150.588	243.396	169.217	186.789	1.10384	0.602406	-
PSMB4	A0A8I3PII7	Proteasome subunit beta	48	8	31	8	8	283.4	332.568	311.778	337.987	338.577	243.133	309.249	306.565	0.991323	0.943711	-
RPAP3	A0A8I3PQG4	RNA polymerase II associated protein 3	22	14	14	14	14	122.1	224.187	121.792	160.993	127.16	242.737	156.026	176.963	1.13419	0.687365	-
RHEB	A0A8I3N749	Ras homolog, mTORC1 binding	29	7	9	7	7	232	144.402	154.379	149.89	126.031	242.605	176.927	172.842	0.97691	0.932373	-
PKN1	A0A8I3PJ31	protein kinase C	22	21	22	20	21	223.9	278.536	187.218	230.55	171.476	242.077	229.884	214.701	0.933951	0.682369	-
ALDH1L1	A0A8I3RYX4	10-formyltetrahydrofolate dehydrogenase	13	10	10	10	10	57.8	53.4005	52.3404	51.7594	49.6786	241.813	54.5136	114.417	2.09887	0.446303	-
SCEL	A0A8I3S638	Sciellin	45	28	42	28	28	664.5	380.597	453.701	579.476	874.033	241.549	499.599	565.02	1.13095	0.768029	-
NAGK	A0A8I3P9K5	N-acetyl-D-glucosamine kinase	47	13	22	8	13	387.2	327.038	252.517	258.144	309.221	241.286	322.252	269.55	0.836458	0.31628	-
AP1M2	A0A8I3PSI8	AP-1 complex subunit mu-2	52	20	24	16	20	251.1	293.229	203.951	248.184	176.274	241.286	249.427	221.915	0.889698	0.470318	-
ATP1B1	P06583	Sodium/potassium-transporting ATPase subunit beta-1	23	5	7	5	5	410.3	110.435	319.83	177.157	131.112	241.286	280.188	183.185	0.653793	0.392747	-
LOC119868926	A0A8I3PN07	C-type lectin domain-containing protein	3	1	1	1	1	67.6	64.1438	106.694	176.668	88.6311	241.286	79.4792	168.861	2.1246	0.172686	-
UFC1	A0A8I3Q438	Ubiquitin-fold modifier-conjugating enzyme 1	33	6	9	6	6	228.3	209.81	194.138	239.367	209.582	240.89	210.749	229.946	1.09109	0.247578	-
SNCG	A0A8I3MU58	Gamma-synuclein	69	10	20	10	10	257	417.566	460.998	359.213	592.333	240.758	378.522	397.435	1.04997	0.884437	-
APOA4	A0A8I3MKL7	Apolipoprotein A4	50	18	25	5	18	124	99.0594	99.2706	54.6984	84.256	240.626	107.443	126.527	1.17761	0.773318	-
MSI2	A0A8I3NV14	Musashi RNA binding protein 2	23	6	7	4	6	139.7	147.562	119.653	131.603	99.6395	240.494	135.638	157.245	1.1593	0.6651	-
LOC100687983	A0A8I3NWK2	Annexin A2	16	7	12	7	7	403.2	221.501	273.152	520.696	368.92	240.362	299.284	376.659	1.25853	0.477489	-
SNRPN	A0A8I3P709	Small nuclear ribonucleoprotein-associated protein	28	8	11	8	8	297.3	212.022	148.717	220.753	151.294	240.098	219.346	204.048	0.930256	0.780975	-
SNRPB	A0A8I3P5Y9	Small nuclear ribonucleoprotein-associated protein	28	8	11	8	8	297.3	212.022	148.717	220.753	151.294	240.098	219.346	204.048	0.930256	0.780975	-
UCHL5	A0A8I3PKD9	Ubiquitin carboxyl-terminal hydrolase	44	12	16	12	12	289.8	252.309	210.997	270.063	224.965	239.834	251.036	244.954	0.975775	0.831331	-
PRKACA	Q8MJ44	cAMP-dependent protein kinase catalytic subunit alpha	36	15	18	7	15	174.4	198.751	183.317	187.281	182.202	239.834	185.489	203.106	1.09497	0.447571	-
GAPDHS	A0A8I3MKW3	Glyceraldehyde-3-phosphate dehydrogenase	5	2	15	1	2	49.4	157.358	232.261	146.298	427.208	239.571	146.339	271.025	1.85203	0.283827	-
APPL2	A0A8I3MVM2	Adaptor protein, phosphotyrosine interacting with PH domain and leucine zipper 2	38	17	19	5	17	108.2	156.726	118.143	128.664	112.624	239.439	127.69	160.242	1.25493	0.508754	-
EPB41	A0A8I3N7K5	Protein 4.1	22	17	18	16	17	146.1	144.402	130.474	130.623	91.8772	239.439	140.325	153.98	1.0973	0.787087	-
AP2M1	A0A8I3PSX7	AP-2 complex subunit mu	46	18	22	17	18	198.4	256.101	203.197	245.571	186.577	238.647	219.233	223.598	1.01991	0.875913	-
SEC23IP	A0A8I3PAS9	SEC23 interacting protein	27	25	30	24	25	271.7	243.62	242.955	240.346	175.004	238.647	252.758	217.999	0.862481	0.243565	-
CBX3	A0A8I3NCM0	Chromobox 3	50	9	16	8	9	228.1	206.334	167.338	193.485	118.833	238.647	200.591	183.655	0.915572	0.695131	-
LOC119864623	A0A8I3NS34	Chromo domain-containing protein	43	8	15	7	8	228.1	206.334	167.338	193.485	118.833	238.647	200.591	183.655	0.915572	0.695131	-
SNX2	A0A8I3NAQ9	Sorting nexin-2	39	21	30	19	21	310.7	304.13	279.065	253.572	271.539	238.251	297.965	254.454	0.853973	0.0330498	-
RPS7	A0A8I3PNN7	40S ribosomal protein S7	35	6	8	6	6	141.3	194.643	121.918	193.975	163.572	238.119	152.62	198.556	1.30098	0.208656	-
ELOB	A0A8I3MQ57	Ubiquitin-like domain-containing protein	44	8	13	8	8	275.3	269.372	258.808	241.326	219.461	237.856	267.827	232.881	0.86952	0.0169777	-
CYCS	P00011	Cytochrome c	63	8	10	7	8	205	127.814	147.333	176.341	107.543	237.328	160.049	173.737	1.08553	0.774532	-
CSTB	A0A8I3NW54	Cystatin B	70	8	64	8	8	358.1	486.292	441.119	474.978	349.162	236.8	428.504	353.647	0.825306	0.407999	-
ENO3	A0A8I3MKD5	phosphopyruvate hydratase	27	9	82	1	9	57.7	122.442	104.807	90.9462	103.45	236.668	94.9828	143.688	1.51278	0.4137	-
ARPC1A	A0A8I3MPK0	Actin-related protein 2/3 complex subunit	55	16	23	15	16	334.9	317.243	244.339	318.393	287.769	236.404	298.827	280.856	0.939859	0.649741	-
LOC481394	A0A8I3PC14	inorganic diphosphatase	27	10	14	10	10	205.2	156.094	191.118	178.137	151.717	236.273	184.137	188.709	1.02483	0.883815	-
TBCA	A0A8I3N6S6	Tubulin-specific chaperone A	63	10	14	10	10	280	271.426	214.017	227.774	264.623	236.141	255.148	242.846	0.951786	0.63644	-
TXNDC5	A0A8I3S2V9	Thioredoxin domain-containing protein	34	14	21	14	14	209.2	177.58	195.27	177.647	176.557	236.141	194.017	196.782	1.01425	0.907158	-
ARPC3	A0A8I3PVA8	Actin-related protein 2/3 complex subunit 3	38	8	18	3	8	289.9	340.309	278.562	337.497	333.355	236.009	302.924	302.287	0.997898	0.987691	-
U2AF2	A0A8I3RP62	Splicing factor U2AF subunit	33	10	14	10	10	144.4	140.295	127.957	257.001	178.109	236.009	137.551	223.706	1.62635	0.0618903	-
VAC14	A0A8I3MZ32	Protein VAC14 homolog	22	15	16	15	15	287.7	277.904	252.517	244.592	234.985	235.745	272.707	238.441	0.874347	0.0720609	-
LYZF2	A0A077S9R2	Lysozyme C, milk isozyme-like	70	8	58	8	8	281.9	478.392	1474.21	328.843	701.287	235.481	744.835	421.87	0.566394	0.482725	-
IFGGC1	A0A5K1TXL6	Interferon-gamma-inducible GTPase IFGGC1 protein	23	10	10	10	10	472.7	279.168	617.768	187.444	193.775	235.085	456.545	205.435	0.449977	0.12154	-
MAPK3	A0A8I3MJZ4	Mitogen-activated protein kinase	50	17	31	1	17	239.4	300.338	264.47	289.983	262.789	234.821	268.069	262.531	0.97934	0.827505	-
ATP5F1E	A0A8I3NII8	ATP synthase F1 subunit epsilon	45	3	5	3	3	227.3	216.288	359.84	281.329	243.595	234.03	267.809	252.985	0.944644	0.78378	-
HGS	A0A8I3N2P0	Hepatocyte growth factor-regulated tyrosine kinase substrate	13	13	17	13	13	294.8	220.711	173.755	166.544	196.456	234.03	229.755	199.01	0.866182	0.498842	-
PSMB10	A0A8I3RZF7	Proteasome subunit beta	32	8	20	8	8	389.5	317.717	431.431	337.987	266.035	233.634	379.549	279.219	0.735658	0.0915677	-
SNRPG	J9P061	Small nuclear ribonucleoprotein G	37	5	7	5	5	219.7	165.889	105.184	168.667	110.93	233.634	163.591	171.077	1.04576	0.884794	-
TGM1	Q9GLK0	Protein-glutamine gamma-glutamyltransferase K	36	24	28	24	24	231.7	151.512	325.24	278.39	503.984	233.502	236.151	338.625	1.43394	0.364934	-
SNRNP40	A0A8I3N4I8	Small nuclear ribonucleoprotein U5 subunit 40	31	6	7	6	6	253.2	163.677	222.195	225.325	140.144	233.502	213.024	199.657	0.937251	0.753813	-
PML	A0A8I3Q588	PML nuclear body scaffold	25	22	29	2	22	507.5	210.6	227.354	218.63	209.864	233.37	315.151	220.621	0.700049	0.429859	-
SRRM1	A0A8I3NSA6	Serine and arginine repetitive matrix 1	7	5	6	5	5	122	141.559	144.062	135.195	123.209	233.37	135.874	163.925	1.20645	0.507786	-
UBE2K	A0A8I3MXK5	Ubiquitin conjugating enzyme E2 K	36	7	11	3	7	252.7	318.033	256.544	301.739	295.249	233.106	275.759	276.698	1.00341	0.976862	-
GAPVD1	A0A8I3RV53	GTPase activating protein and VPS9 domains 1	17	27	30	27	27	243.4	318.349	272.648	269.41	250.369	233.106	278.132	250.962	0.90231	0.346379	-
CLTB	A0A8I3NML2	Clathrin light chain	35	10	16	10	10	512.5	250.571	284.475	307.78	249.381	233.106	349.182	263.423	0.754399	0.408506	-
LUC7L3	A0A8I3NUG2	LUC7 like 3 pre-mRNA splicing factor	6	3	3	3	3	96.5	74.2551	83.795	140.583	95.2644	232.975	84.85	156.274	1.84177	0.217785	-
BCAS1	A0A8I3Q4H2	Brain enriched myelin associated protein 1	18	9	10	9	9	104.2	156.41	80.5237	120.826	99.3572	232.843	113.711	151.009	1.328	0.484584	-
CPSF4	A0A8I3RSW2	Cleavage and polyadenylation specificity factor subunit 4	7	2	2	2	2	168.1	157.99	147.207	160.993	131.112	232.711	157.766	174.938	1.10885	0.628956	-
TIMM9	A0A8I3PDA9	Mitochondrial import inner membrane translocase subunit	56	4	5	4	4	284.4	135.397	187.469	248.347	294.402	232.447	202.422	258.399	1.27653	0.33149	-
CDC73	A0A8I3PMV4	Cell division cycle 73	12	6	6	6	6	169.8	210.916	164.948	199.2	165.266	232.447	181.888	198.971	1.09392	0.52303	-
HRPT2	A2SXS7	Cell division cycle 73	12	6	6	6	6	169.8	210.916	164.948	199.2	165.266	232.447	181.888	198.971	1.09392	0.52303	-
AP3D1	A0A8I3NNE4	Adaptor related protein complex 3 subunit delta 1	22	21	22	21	21	210.3	185.638	121.666	195.934	130.406	232.051	172.535	186.131	1.0788	0.749958	-
SRSF3	A0A8I3RVB0	Serine and arginine rich splicing factor 3	25	4	5	3	4	120.2	70.9373	96.7543	94.0485	113.329	231.655	95.9639	146.344	1.52499	0.363895	-
DLAT	A0A8I3MGU8	Acetyltransferase component of pyruvate dehydrogenase complex	20	8	9	8	8	206.1	150.564	193.383	209.16	160.75	231.391	183.349	200.434	1.09318	0.559641	-
VMO1	A0A8I3NMK2	Vitelline membrane outer layer 1 homolog	46	8	21	8	8	288.6	164.783	526.172	296.677	386.42	231.128	326.518	304.742	0.933307	0.863366	-
VPS26A	A0A8I3MQ24	VPS26, retromer complex component A	50	14	24	14	14	247.2	279.957	218.421	251.776	201.114	230.996	248.526	227.962	0.917255	0.424733	-
CHADL	A0A8I3P4H2	Uncharacterized protein	37	23	27	23	23	255.9	190.693	242.578	176.994	179.944	230.996	229.724	195.978	0.853103	0.273038	-
RBM3	A0A8I3PWB3	RNA binding motif protein 3	37	5	12	5	5	329.5	142.823	152.869	140.583	148.895	230.864	208.397	173.447	0.832291	0.640176	-
RPL27	A0A8I3MYV4	60S ribosomal protein L27	45	7	7	7	7	166.5	210.284	215.527	152.502	108.531	230.864	197.437	163.966	0.830471	0.459581	-
ARPC4	A0A8I3N156	Actin-related protein 2/3 complex subunit 4	57	8	19	8	8	218.3	342.995	237.042	293.085	227.082	230.732	266.112	250.3	0.940579	0.74416	-
C2	A0A8I3NQQ5	Complement C2	18	12	13	12	12	106.2	107.591	151.863	149.237	165.125	230.732	121.885	181.698	1.49074	0.124317	-
RPS28	A0A8I3NCS3	Small ribosomal subunit protein eS28	36	3	4	3	3	258.8	291.965	149.346	97.804	131.253	230.732	233.37	153.263	0.656737	0.244725	-
CPNE3	A0A8I3PCG6	Copine 3	37	15	17	15	15	159.2	167.153	158.405	202.139	176.698	230.336	161.586	203.058	1.25665	0.11146	-
EPB41L1	A0A8I3PTQ1	Erythrocyte membrane protein band 4.1 like 1	29	19	21	17	19	206.7	293.545	191.37	304.515	200.69	230.204	230.538	245.136	1.06332	0.758511	-
CRYL1	A0A8I3PDK8	Crystallin lambda 1	56	16	32	16	16	192.7	291.649	219.805	237.407	215.227	230.072	234.718	227.569	0.969542	0.833338	-
GOPC	A0A8I3RTE1	Golgi associated PDZ and coiled-coil motif containing	24	9	9	9	9	313.3	242.356	224.334	223.529	211.557	230.072	259.997	221.719	0.852778	0.292484	-
CTSC	O97578	Dipeptidyl peptidase 1 (Fragment)	37	14	20	14	14	237.7	350.105	451.059	322.802	258.272	229.808	346.288	270.294	0.780548	0.348236	-
GOLGB1	A0A8I3PCQ7	Golgin B1	14	39	39	39	39	300.4	260.525	220.937	362.969	256.579	229.676	260.621	283.075	1.08616	0.662137	-
SDHA	A0A8I3P4H0	Succinate dehydrogenase [ubiquinone] flavoprotein subunit, mitochondrial	36	19	24	19	19	317	105.537	367.893	270.39	225.53	229.676	263.477	241.865	0.917976	0.814584	-
PIK3CA	A0A5F4C2B1	phosphatidylinositol-4,5-bisphosphate 3-kinase	4	4	4	4	4	158.8	219.132	171.49	190.546	129.701	229.545	183.141	183.264	1.00067	0.997341	-
SCRN2	A0A8I3NUU3	Secernin 2	52	17	25	17	17	218	236.036	182.437	182.709	167.101	229.413	212.158	193.074	0.91005	0.480087	-
RPL37A	A0A8I3PIR1	Uncharacterized protein	14	2	3	2	2	124.8	102.377	176.523	207.201	173.875	229.281	134.567	203.452	1.5119	0.0702335	-
LOC102154393	A0A8I3RVB3	Uncharacterized protein	17	2	3	2	2	124.8	102.377	176.523	207.201	173.875	229.281	134.567	203.452	1.5119	0.0702335	-
HIBCH	A0A8I3S4X3	3-hydroxyisobutyryl-CoA hydrolase	30	10	15	10	10	219.9	183.426	277.052	161.483	198.997	229.149	226.793	196.543	0.866619	0.423012	-
FUS	A0A8I3NN11	FUS RNA binding protein	14	7	11	5	7	263.4	83.2605	115.375	258.96	193.916	229.017	154.012	227.298	1.47584	0.316918	-
ABHD11	A0A8I3MHE2	Abhydrolase domain containing 11	35	10	12	10	10	259.7	89.2641	267.112	128.011	138.027	229.017	205.359	165.018	0.803561	0.584778	-
SERBP1	A0A8I3QC63	Uncharacterized protein	31	15	23	15	15	342.1	138.715	171.616	181.566	240.772	228.753	217.477	217.03	0.997946	0.995104	-
LOC102156116	A0A8I3P4T3	Nucleoside diphosphate kinase	55	8	31	2	8	230.8	331.304	236.287	279.37	282.406	228.489	266.13	263.422	0.989822	0.946188	-
SLC27A2	A0A8I3PDX5	Solute carrier family 27 member 2	25	14	18	14	14	204.7	86.4203	153.498	102.866	86.0908	228.489	148.206	139.149	0.938885	0.880912	-
CLTA	A0A8I3NIM2	Clathrin light chain	33	9	12	9	9	309.6	236.352	168.471	195.771	191.658	228.093	238.141	205.174	0.861566	0.507891	-
SYMPK	A0A8I3MLN8	Symplekin scaffold protein	12	14	14	14	14	281	215.656	189.482	212.589	183.896	227.961	228.713	208.149	0.910088	0.546029	-
SULT1D1	A0A8I3RXJ1	Sulfotransferase	3	2	3	2	2	443.9	290.701	311.652	313.985	260.813	227.698	348.751	267.498	0.767019	0.229794	-
DYNC1I2	A0A8I3PVW4	Dynein cytoplasmic 1 intermediate chain 2	41	21	44	21	21	310.4	262.895	227.102	248.347	239.502	227.566	266.799	238.471	0.893825	0.361384	-
TRAP1	A0A8I3MHC7	TNF receptor associated protein 1	26	19	21	18	19	167.3	106.959	199.925	144.665	151.153	227.302	158.061	174.373	1.1032	0.690003	-
GGH	A0A8I3SCF8	folate gamma-glutamyl hydrolase	25	10	16	10	10	200.2	185.164	183.569	219.61	157.786	227.038	189.644	201.478	1.0624	0.647678	-
CNDP1	A0A8I3MIJ8	Carnosine dipeptidase 1	40	18	28	18	18	296.4	382.967	373.806	356.764	356.5	226.906	351.058	313.39	0.892703	0.509751	-
RPS2	A0A8I3PAP3	Small ribosomal subunit protein uS5	28	8	17	4	8	194.1	227.979	160.293	201.323	183.754	226.642	194.124	203.906	1.05039	0.698186	-
NDUFS1	A0A8I3S1V9	NADH-ubiquinone oxidoreductase 75 kDa subunit, mitochondrial	39	22	26	22	22	328.9	143.139	359.463	218.14	178.674	226.51	277.167	207.775	0.749637	0.413545	-
RBX1	A0A8I3NXW3	Ring-box 1	13	2	2	2	2	118	185.006	130.096	227.774	155.246	226.51	144.367	203.177	1.40736	0.137974	-
PPP2R2A	A0A8I3P0S7	Serine/threonine-protein phosphatase 2A 55 kDa regulatory subunit B	43	17	27	9	17	237.3	363.85	280.826	387.624	368.214	226.378	293.992	327.405	1.11365	0.626037	-
ADI1	A0A8I3S4Y3	Acireductone dioxygenase	60	8	18	8	8	273.3	223.555	133.367	153.482	133.652	226.378	210.074	171.171	0.814812	0.482846	-
ADH4	A0A8I3PLN9	Alcohol dehydrogenase 4 (class II), pi polypeptide	52	13	30	13	13	428.3	388.812	298.567	368.194	525.859	226.246	371.893	373.433	1.00414	0.988124	-
PACS1	A0A8I3NP35	Phosphofurin acidic cluster sorting protein 1	16	20	22	12	20	245.7	264.79	219.175	249.163	201.678	226.246	243.222	225.696	0.927942	0.409701	-
IMPA1	A0A8I3NVV9	Inositol-1-monophosphatase	48	12	21	12	12	220.1	250.413	196.906	216.508	248.111	225.983	222.473	230.2	1.03473	0.695886	-
APPL1	A0A8I3PIV9	Adaptor protein, phosphotyrosine interacting with PH domain and leucine zipper 1	41	22	26	20	22	362.2	268.898	251.008	274.145	293.979	225.851	294.035	264.658	0.90009	0.512072	-
SSH3	A0A8I3RW57	protein-serine/threonine phosphatase	19	11	13	11	11	191.8	174.578	182.814	189.73	220.025	225.851	183.064	211.869	1.15735	0.107777	-
LONP1	A0A8I3NN56	Lon protease homolog, mitochondrial	35	26	34	26	26	172.6	127.182	235.029	155.768	181.355	225.851	178.27	187.658	1.05266	0.815888	-
SEC23A	A0A8I3RR85	Protein transport protein SEC23	35	21	28	17	21	201.9	217.394	192.125	214.548	182.202	225.719	203.806	207.49	1.01807	0.82089	-
SRSF7	A0A8I3S2F3	Uncharacterized protein	22	5	5	4	5	134.3	81.3646	97.0059	101.396	96.8168	225.587	104.224	141.267	1.35542	0.480512	-
SET	A0A8I3PWN9	Uncharacterized protein	20	8	15	8	8	129.8	300.654	139.658	124.255	94.4176	225.455	190.037	148.043	0.779018	0.574142	-
SH3BP1	A0A8I3NCX7	SH3 domain binding protein 1	27	19	25	19	19	220.9	271.9	219.05	275.451	274.926	225.191	237.283	258.523	1.08951	0.426831	-
ERI3	A0A8I3PU82	ERI1 exoribonuclease family member 3	13	5	5	5	5	226.7	230.033	166.709	182.382	176.698	225.059	207.814	194.713	0.936958	0.638136	-
LOC100685290	A0A8I3QK02	Large ribosomal subunit protein eL33	8	1	2	1	1	261.8	315.347	224.586	186.791	163.149	224.927	267.244	191.622	0.717031	0.0853689	-
BPIFB4	A0A8I3PIZ8	BPI fold containing family B member 4	37	16	44	16	16	164.3	269.53	848.015	151.359	441.18	224.663	427.282	272.401	0.63752	0.554144	-
EDF1	A0A8I3MX31	Uncharacterized protein	28	4	5	4	4	176.3	69.8314	78.259	115.928	152.423	224.532	108.13	164.294	1.51941	0.296188	-
LASP1	A0A8I3RXT2	LIM and SH3 domain protein 1	36	15	33	15	15	564.6	301.286	266.735	245.408	286.216	224.4	377.54	252.008	0.6675	0.312575	-
TOMM70	A0A8I3S0H1	Translocase of outer mitochondrial membrane 70	30	15	15	15	15	240.1	217.236	276.549	277.411	191.658	224.4	244.628	231.156	0.944928	0.682991	-
PABPN1	A0A8I3MVB8	BCL2 like 2	18	8	10	8	8	165	188.955	154.127	257.491	148.612	224.4	169.361	210.168	1.24094	0.332967	-
ADSL	A0A8I3P3A3	Adenylosuccinate lyase	45	17	25	17	17	252.5	202.069	239.81	195.281	256.296	224.004	231.459	225.194	0.97293	0.801065	-
TFG	A0A8I3S3N8	Trafficking from ER to golgi regulator	27	11	15	11	11	232.7	272.532	217.414	222.875	181.355	224.004	240.882	209.411	0.869353	0.220625	-
HMGN2	A0A8I3NKG7	Alkyl transferase	10	4	4	4	4	118	28.5961	34.7259	128.827	72.4009	224.004	60.4407	141.744	2.34517	0.209761	-
GALM	A0A8I3PB48	Aldose 1-epimerase	48	13	22	13	13	241.3	556.281	283.469	431.219	315.007	223.872	360.35	323.366	0.897367	0.768075	-
CRIP2	A0A8I3PNR8	LIM zinc-binding domain-containing protein	8	3	4	3	3	226.2	249.465	117.011	125.725	136.052	223.74	197.559	161.839	0.819193	0.527285	-
NAP1L4	A0A8I3NFR7	Nucleosome assembly protein 1 like 4	48	14	27	13	14	195	148.51	142.175	115.275	121.374	223.74	161.895	153.463	0.947916	0.843057	-
GALK1	Q9GKK4	Galactokinase	23	7	9	7	7	275.5	110.277	162.809	204.752	161.879	223.476	182.862	196.702	1.07569	0.810285	-
PLCD1	A0A8I3Q831	Phosphoinositide phospholipase C	40	23	28	23	23	225	407.929	332.789	380.766	471.947	223.212	321.906	358.642	1.11412	0.70581	-
ANKFY1	A0A8I3MZ60	Ankyrin repeat and FYVE domain containing 1	21	21	23	21	21	220.3	235.246	192.376	208.507	205.489	223.212	215.974	212.403	0.983463	0.812771	-
PMVK	A0A8I3S0N8	Phosphomevalonate kinase	43	10	11	10	10	273.6	332.094	243.207	200.996	219.884	222.948	282.967	214.61	0.758426	0.111709	-
RAB3GAP1	A0A8I3NA37	Rab3 GTPase-activating protein catalytic subunit	24	22	25	22	22	161.9	207.44	176.146	197.404	159.056	222.817	181.829	193.092	1.06195	0.650896	-
PEPD	A0A8I3MFG3	Peptidase D	38	20	43	20	20	258.9	348.683	322.598	350.07	371.46	222.685	310.06	314.738	1.01509	0.935588	-
ATP1A4	A0A8I3SCU4	Sodium/potassium-transporting ATPase subunit alpha	19	17	26	1	17	107.5	19.5907	27.5542	94.3751	37.4001	222.685	51.5483	118.153	2.29209	0.358939	-
RPS12	A0A8I3RTT6	40S ribosomal protein S12	58	9	19	9	9	262.3	199.699	163.815	204.915	194.622	222.157	208.605	207.231	0.993415	0.967001	-
GET3	A0A8I3NZF6	Guided entry of tail-anchored proteins factor 3, ATPase	44	12	17	12	12	202.5	215.814	183.569	180.423	143.673	222.157	200.628	182.084	0.907573	0.510869	-
TPM1	A0A8I3P7B2	Tropomyosin 1	53	19	30	7	19	165	206.334	219.805	181.566	150.024	222.025	197.046	184.538	0.936522	0.663587	-
CDC42BPB	A0A8I3S2L5	non-specific serine/threonine protein kinase	17	26	27	24	26	199.6	229.401	209.613	216.018	177.262	221.893	212.871	205.058	0.963294	0.665178	-
IFIT5	A0A8I3Q503	Interferon induced protein with tetratricopeptide repeats 5	26	12	16	12	12	225.4	293.703	197.283	228.59	226.517	221.761	238.795	225.623	0.944839	0.690917	-
GMPR2	A0A8I3N2R6	GMP reductase	45	13	18	10	13	171.4	185.954	177.152	152.176	135.346	221.761	178.169	169.761	0.952811	0.78204	-
ADAR	A0A8I3NVI3	Adenosine deaminase RNA specific	28	20	22	20	20	334.7	216.13	218.043	221.243	185.307	221.365	256.291	209.305	0.816669	0.35425	-
ZC3HC1	A0A8I3P4R8	Zinc finger C3HC-type containing 1	6	3	4	3	3	239.7	185.322	178.41	229.407	184.742	221.102	201.144	211.75	1.05273	0.680614	-
LOC106558632	A0A8I3NJI8	40S ribosomal protein S15a	17	4	5	4	4	144.5	216.604	120.66	188.26	157.363	220.838	160.588	188.82	1.17581	0.462855	-
DYNC1LI2	A0A8I3NFH8	Dynein light intermediate chain	54	20	33	19	20	339.2	252.151	215.149	241.979	242.889	220.706	268.834	235.191	0.874858	0.458157	-
TSC22D3	A0A8I3S314	TSC22 domain family member 3	17	4	4	3	4	208.6	289.595	163.186	269.573	234.28	220.31	220.46	241.388	1.09493	0.640076	-
H2AX	A0A8I3RP66	Histone H2A	28	6	12	2	6	250.4	446.004	282.21	203.282	161.455	219.914	326.205	194.884	0.597428	0.154462	-
PALM2AKAP2	A0A8I3NMJ8	PALM2 and AKAP2 fusion	13	18	22	18	18	321	196.697	220.685	203.609	183.049	219.782	246.127	202.147	0.821308	0.368151	-
SPR	A0A8I3S3P1	Sepiapterin reductase	61	14	23	14	14	390.7	335.57	381.733	266.797	209.723	219.65	369.334	232.057	0.628311	0.00501668	Down
AK7	A0A8I3MVN9	Adenylate kinase 7	7	5	6	5	5	47.6	47.5549	49.4466	62.3725	54.1948	219.255	48.2005	111.941	2.3224	0.357177	-
DNAH7	A0A8I3PLA2	Dynein axonemal heavy chain 7	2	7	7	7	7	24.7	32.3879	37.9971	39.1869	40.6461	219.255	31.695	99.6959	3.14548	0.37321	-
LOC607191	A0A8I3P3T5	Large ribosomal subunit protein eL31	6	1	1	1	1	267.9	95.8997	121.918	105.478	139.157	219.123	161.906	154.586	0.954788	0.914426	-
RAB10	A0A8I3SAT0	RAB10, member RAS onco family	45	9	12	8	9	263.4	177.738	209.613	285.085	216.215	218.991	216.917	240.097	1.10686	0.529034	-
PDPR	A0A8I3MVQ3	Rhodanese domain-containing protein	23	18	20	17	18	242.2	107.433	347.133	171.116	155.246	218.991	232.255	181.784	0.782692	0.547262	-
MCRIP1	A0A8I3N729	MAPK regulated corepressor interacting protein 1	12	2	3	2	2	164.1	130.025	105.813	98.6203	90.607	218.991	133.313	136.073	1.0207	0.955264	-
FKBP3	A0A8I3MMG4	peptidylprolyl isomerase	39	11	15	11	11	170.9	139.979	94.2379	200.18	209.299	218.595	135.039	209.358	1.55035	0.072056	-
SRGAP2	A0A8I3QG09	Uncharacterized protein	13	9	9	9	9	97.4	148.194	104.303	146.461	115.023	218.463	116.633	159.982	1.37168	0.297717	-
COPS6	A0A8I3N399	COP9 signalosome complex subunit 6	53	13	19	13	13	200.1	245.99	246.604	221.732	209.582	217.803	230.898	216.373	0.937092	0.447009	-
GSTK1	A0A8I3P2R0	Glutathione S-transferase kappa	50	10	22	10	10	181.2	101.113	176.523	165.565	152.846	217.803	152.945	178.738	1.16864	0.477007	-
SEC13	A0A8I3N9C4	SEC13 homolog, nuclear pore and COPII coat complex component	34	8	13	8	8	200.4	198.435	205.965	211.772	199.985	217.672	201.6	209.81	1.04072	0.251885	-
SEC23B	A0A8I3Q0G7	Protein transport protein SEC23	44	26	39	22	26	206.2	228.137	194.893	197.567	179.379	217.276	209.743	198.074	0.944365	0.471216	-
LOC119881433	A0A8I3RU62	40S ribosomal protein S3a	45	11	17	10	11	213.1	253.889	228.989	178.953	205.771	217.012	231.993	200.579	0.864591	0.127791	-
WDR35	A0A8I3P4X6	WD repeat-containing protein 35	15	13	13	13	13	77.3	98.4275	93.3572	121.153	83.5504	216.748	89.6949	140.484	1.56624	0.328014	-
RABEP2	A0A8I3MNR9	Rabaptin, RAB GTPase binding effector protein 2	38	17	17	17	17	273.2	364.008	329.141	292.106	345.492	216.484	322.116	284.694	0.883824	0.46475	-
KIF5A	A0A8I3NQE9	Kinesin family member 5A	11	11	16	11	11	267	317.401	280.952	263.532	294.684	216.484	288.451	258.234	0.895242	0.338344	-
CYB5R3	A0A8I3NU20	NADH-cytochrome b5 reductase	69	17	27	17	17	447.3	215.024	290.011	271.043	234.985	216.484	317.445	240.837	0.758675	0.379886	-
RALB	A0A8I3S667	RAS like proto-oncogene B	29	7	11	5	7	174.8	273.006	237.545	340.763	266.035	216.352	228.45	274.383	1.20106	0.378785	-
OTUD6B	A0A8I3PCR1	ubiquitinyl hydrolase 1	13	4	4	4	4	169.7	185.322	108.33	160.176	228.352	216.352	154.45	201.627	1.30545	0.209694	-
SF3A2	A0A8I3NBJ0	Splicing factor 3a subunit 2	14	6	7	6	6	253.5	127.972	135.632	115.601	96.8168	216.352	172.368	142.923	0.829177	0.621162	-
PKP1	A0A8I3S0K7	Plakophilin 1	56	32	47	32	32	544.1	260.209	654.758	622.418	998.935	215.957	486.356	612.437	1.25924	0.654613	-
RPTN	A0A8I3PMI7	Repetin	39	31	83	31	31	392.2	185.796	880.602	691.975	1478.93	215.825	486.199	795.575	1.63632	0.51439	-
MT1	O19000	Metallothionein-1	34	3	5	3	3	497.1	268.424	175.391	198.547	530.799	215.693	313.638	315.013	1.00438	0.992859	-
MT1E	A0A8I3MU77	Metallothionein 1E	9	3	5	3	3	497.1	268.424	175.391	198.547	530.799	215.693	313.638	315.013	1.00438	0.992859	-
MT2A	Q9XST5	Metallothionein-2	34	3	5	3	3	497.1	268.424	175.391	198.547	530.799	215.693	313.638	315.013	1.00438	0.992859	-
OTUB1	A0A8I3Q5J1	Ubiquitin thioesterase	64	15	36	15	15	308.9	377.911	340.338	288.024	326.298	215.693	342.383	276.671	0.808076	0.173828	-
TMED10	A0A8I3NRF0	Transmembrane p24 trafficking protein 10	37	8	14	8	8	369.8	259.735	219.427	213.242	171.052	215.693	282.987	199.996	0.70673	0.19896	-
CAPRIN1	A0A8I3S8S8	Cell cycle associated protein 1	9	9	12	9	9	302.5	170.945	142.93	171.932	152.705	215.693	205.458	180.11	0.876627	0.667995	-
LOC607011	A0A8I3Q600	UDP-N-acetylglucosamine pyrophosphorylase 1 like 1	42	18	21	15	18	223.2	151.038	174.007	126.214	138.733	215.561	182.748	160.169	0.876449	0.557558	-
MAP7	A0A8I3RUJ4	Microtubule associated protein 7	3	2	2	2	2	60.4	78.5208	53.5986	87.6807	70.1428	215.429	64.1731	124.417	1.93878	0.318043	-
LOC484977	A0A8I3S6L4	Uncharacterized protein	52	7	10	7	7	249.6	291.649	246.226	257.817	299.483	215.297	262.492	257.532	0.981107	0.871415	-
SERPINB9	A0A8I3NST3	Serpin family B member 9	36	12	21	11	12	260.8	328.618	258.053	206.548	221.719	215.297	282.491	214.521	0.759392	0.0936637	-
PPP5C	A0A8I3MWI3	Serine/threonine-protein phosphatase	46	20	31	20	20	187.9	143.612	152.995	138.297	152.564	215.033	161.503	168.631	1.04414	0.808929	-
MECR	A0A8I3MYL2	Mitochondrial trans-2-enoyl-CoA reductase	25	10	17	10	10	194.3	106.485	200.68	138.787	148.471	215.033	167.155	167.43	1.00165	0.994681	-
LOC102152698	A0A8I3NNX3	Uncharacterized protein	51	12	19	11	12	304.3	334.148	290.137	310.719	312.044	214.769	309.528	279.177	0.901945	0.454441	-
NPLOC4	A0A8I3ND14	NPL4 homolog, ubiquitin recognition factor	47	25	32	25	25	196	242.514	195.396	241.326	215.368	214.769	211.303	223.821	1.05924	0.532425	-
NUP93	A0A8I3MJ67	Nuclear pore complex protein Nup93	25	22	24	22	22	325.3	236.51	239.935	268.267	240.913	214.637	267.249	241.272	0.902801	0.486687	-
VAPB	A0A8I3NZT7	VAMP associated protein B and C	40	11	14	10	11	284.1	224.977	170.987	207.691	170.347	214.637	226.688	197.558	0.871498	0.477675	-
HSD17B10	A0A8I3Q7T6	Hydroxysteroid 17-beta dehydrogenase 10	46	9	13	9	9	171.9	91.002	140.036	145.645	106.696	214.505	134.313	155.615	1.15861	0.619028	-
GNAS	A0A8I3RXQ8	GNAS complex locus	34	12	13	12	12	121.2	89.2641	125.692	142.216	105.567	214.505	112.052	154.096	1.37522	0.319496	-
DDO	A0A8I3NNC2	D-aspartate oxidase	12	3	3	3	3	122.5	70.6213	110.091	83.2721	92.0183	214.242	101.071	129.844	1.28468	0.576129	-
RPL34	A0A8I3Q1D4	Large ribosomal subunit protein eL34	16	2	3	2	2	342.5	400.819	364.999	208.18	217.626	214.11	369.439	213.305	0.577376	0.0101221	Down
RPA1	A0A8I3NHE9	Replication protein A subunit	28	17	21	17	17	224.8	246.306	244.591	230.713	182.484	214.11	238.565	209.102	0.876498	0.16108	-
PITRM1	A0A8I3MRV7	Pitrilysin metalloproteinase 1	24	20	20	20	20	183.9	130.341	181.304	181.566	183.049	213.978	165.182	192.864	1.16759	0.26006	-
PDHA1	A0A8I3PZS7	Pyruvate dehydrogenase E1 component subunit alpha	33	16	19	16	16	217	115.016	226.725	119.52	116.011	213.978	186.247	149.836	0.804503	0.490976	-
CAMK2D	A0A8I3QH31	calcium/calmodulin-dependent protein kinase	41	17	30	12	17	361.7	325.774	284.224	268.104	252.909	213.45	323.899	244.821	0.755855	0.0512801	-
CD82	A0A8I3MZS1	Tetraspanin	9	2	4	2	2	331	230.033	234.022	304.188	177.121	213.318	265.018	231.543	0.873685	0.541851	-
AKAP9	A0A8I3NM97	A-kinase anchoring protein 9	7	21	23	20	21	162.9	147.72	144.062	118.377	104.297	213.318	151.561	145.331	0.958894	0.87333	-
LOC490346	A0A8I3ME89	Flavin-containing monooxygenase	16	8	8	6	8	114.6	86.8943	75.2393	220.1	66.05	213.318	92.2445	166.489	1.80487	0.275278	-
CPS1	A0A8I3P9N3	Carbamoyl-phosphate synthase 1	1	2	2	2	2	273.5	384.231	272.774	295.534	353.678	213.186	310.168	287.466	0.926807	0.70147	-
PSMB6	A0A8I3RT39	Proteasome subunit beta	34	8	14	8	8	184.9	236.352	168.974	282.962	245.006	212.922	196.742	246.963	1.25526	0.154934	-
HK2	A0A8I3P147	hexokinase	25	20	22	15	20	199	153.092	244.717	299.29	239.643	212.79	198.936	250.574	1.25957	0.233112	-
MAT2A	A0A8I3NU09	S-adenosylmethionine synthase	50	18	31	15	18	227.3	236.51	216.407	218.63	236.961	212.527	226.739	222.706	0.982212	0.689941	-
CARS1	A0A8I3NC57	cysteine--tRNA ligase	33	21	28	21	21	191.3	248.044	218.672	239.203	258.978	212.395	219.339	236.859	1.07988	0.457153	-
RPN1	E2RQ08	Dolichyl-diphosphooligosaccharide--protein glycosyltransferase subunit 1	39	23	26	23	23	382.9	184.216	222.824	234.795	176.98	212.263	263.313	208.013	0.789981	0.462564	-
YES1	A0A8I3ML64	Tyrosine-protein kinase	12	6	8	2	6	211	193.853	205.587	192.832	154.399	212.131	203.48	186.454	0.916325	0.424384	-
PFDN2	A0A8I3Q7K8	Prefoldin subunit 2	56	7	12	7	7	209.1	202.543	180.172	182.872	199.138	211.867	197.271	197.959	1.00349	0.957517	-
EXOC1	A0A8I3NMX9	Exocyst complex component 1	22	21	22	21	21	239.4	239.038	217.791	250.47	172.605	211.867	232.077	211.647	0.911971	0.464256	-
LOC607874	A0A8I3QNP3	Uncharacterized protein	47	5	24	5	5	238.5	389.76	293.912	531.146	478.58	211.603	307.391	407.11	1.3244	0.430375	-
CHL1	A0A8I3NDQ3	Cell adhesion molecule L1 like	28	23	30	23	23	287.7	301.76	295.925	338.967	180.085	211.603	295.128	243.552	0.82524	0.399561	-
ELAVL1	A0A8I3Q1Z1	ELAV-like protein	33	9	14	9	9	189.5	187.85	177.026	208.017	176.839	211.339	184.792	198.732	1.07543	0.333074	-
RPS15A	A0A8I3MV29	40S ribosomal protein S15a	56	8	9	8	8	145.3	204.28	119.779	198.22	140.85	211.075	156.453	183.382	1.17212	0.461812	-
LOC106559461	A0A8I3RVC0	40S ribosomal protein S15a	25	6	7	6	6	145.3	204.28	119.779	198.22	140.85	211.075	156.453	183.382	1.17212	0.461812	-
SFPQ	A0A8I3NK76	RRM domain-containing protein	36	21	28	20	21	343.2	172.367	150.101	199.527	178.109	210.944	221.889	196.193	0.884194	0.716013	-
TRAPPC13	A0A8I3NFN1	Trafficking protein particle complex subunit 13	13	5	6	5	5	187.6	175.368	144.314	176.178	163.996	210.812	169.094	183.662	1.08615	0.4872	-
IGBP1	A0A8I3Q5V0	Uncharacterized protein	22	8	13	8	8	169.1	251.361	193.257	260.593	189.117	210.548	204.573	220.086	1.07583	0.656748	-
UFD1	A0A8I3S770	Ubiquitin recognition factor in ER associated degradation 1	33	9	13	9	9	206.6	153.092	180.172	177.974	228.493	209.888	179.955	205.452	1.14169	0.298665	-
HDGFL2	A0A8I3NU31	HDGF like 2	5	5	8	3	5	70.1	82.9445	86.563	59.1069	46.4326	209.888	79.8692	105.143	1.31643	0.678318	-
ATP6V1H	A0A8I3PPK2	V-type proton ATPase subunit H	53	19	35	6	19	268.8	318.191	298.944	231.856	240.066	209.756	295.312	227.226	0.769445	0.0223498	-
MTOR	A0A8I3MJG3	Serine/threonine-protein kinase mTOR	13	23	24	23	23	183.2	240.302	167.338	179.607	134.217	209.756	196.947	174.527	0.886161	0.512011	-
SUOX	A0A8I3MXH6	sulfite oxidase	37	18	27	18	18	379.8	187.692	286.866	207.691	165.266	209.624	284.786	194.194	0.681894	0.240034	-
NME7	A0A8I3MPU3	Nucleoside diphosphate kinase 7	13	5	5	5	5	53.9	67.1456	55.4859	80.1699	61.9571	209.492	58.8438	117.206	1.99182	0.335532	-
DPY30	A0A8I3RX81	Dpy-30 histone methyltransferase complex regulatory subunit	11	2	2	2	2	170.2	172.683	129.09	144.828	110.648	209.36	157.324	154.945	0.984881	0.945924	-
DDX6	A0A8I3MJT5	Uncharacterized protein	34	14	17	14	14	211	263.843	174.636	240.51	205.206	209.097	216.493	218.271	1.00821	0.954077	-
LOC478000	A0A8I3P0M7	phytanoyl-CoA dioxygenase	8	3	3	3	3	109.3	130.657	80.3979	161.972	140.709	209.097	106.785	170.593	1.59753	0.0686386	-
GGCT	A0A8I3S182	Gamma-glutamylcyclotransferase	66	16	21	16	16	248.6	282.327	253.776	298.637	382.328	208.965	261.568	296.643	1.1341	0.558613	-
AP2B1	A0A8I3NCI2	AP complex subunit beta	35	36	55	16	36	150.9	238.722	171.239	223.855	167.101	208.965	186.954	199.974	1.06964	0.70417	-
RBKS	A0A8I3NFL0	Ribokinase	42	11	13	11	11	305.1	373.645	240.061	328.517	310.632	208.305	306.269	282.485	0.922342	0.681057	-
SPAG6	A0A8I3NIL5	Sperm associated antigen 6	12	6	6	6	6	28.6	32.3879	58.6313	29.3902	33.4484	208.305	39.8731	90.3812	2.26672	0.483004	-
BOLA2B	A0A8I3N0Z9	Uncharacterized protein	41	5	9	5	5	243.5	123.39	181.304	181.403	157.786	208.173	182.731	182.454	0.998482	0.994629	-
SULT1E1	A0A8I3NE83	Sulfotransferase	64	17	33	17	17	518.8	388.97	385.633	542.412	356.924	208.041	431.134	369.126	0.856173	0.603114	-
CASTOR2	A0A8I3RRI6	Uncharacterized protein	5	2	2	2	2	83.8	127.656	141.923	150.053	193.069	208.041	117.793	183.721	1.5597	0.0555793	-
LOC119863879	E2RR77	Ribosomal protein L37	23	3	4	3	3	251.1	266.686	396.705	109.397	142.685	207.909	304.83	153.33	0.503002	0.0605741	-
SPAG9	A0A8I3NZN0	Sperm associated antigen 9	23	23	25	18	23	215.8	277.904	251.385	241.489	238.231	207.382	248.363	229.034	0.922175	0.420161	-
LOC484960	A0A8I3PHP7	Uncharacterized protein	10	15	16	15	15	77.4	118.65	86.6888	120.826	161.879	207.118	94.2463	163.274	1.73242	0.0911345	-
LOC609365	A0A8I3MKY4	Uncharacterized protein	28	8	13	8	8	204.1	157.674	164.822	351.866	152.705	207.118	175.532	237.23	1.35149	0.409568	-
LOC100686592	A0A8I3PZH9	Uncharacterized protein	18	2	2	1	2	160.6	226.873	103.548	127.357	122.503	207.118	163.674	152.326	0.930668	0.813983	-
OAS2	A0A8I3PQU7	2'-5' oligoadenylate synthase	27	16	20	15	16	266.7	164.309	171.616	209.16	120.527	207.118	200.875	178.935	0.890777	0.644974	-
DNAJB13	A0A8I3N043	DnaJ heat shock protein family (Hsp40) member B13	20	4	5	4	4	15.9	19.4327	15.8531	29.2269	25.1216	207.118	17.0619	87.1554	5.10818	0.36308	-
TRAPPC6B	A0A8I3N5C1	Trafficking protein particle complex subunit 6B	36	6	6	6	6	204.5	216.13	199.17	178.79	169.782	206.986	206.6	185.186	0.896351	0.187002	-
CASP10	A0A8I3SCI1	Caspase 10	50	19	25	19	19	255.2	275.376	246.478	231.039	175.428	206.854	259.018	204.44	0.78929	0.0568463	-
MTA2	A0A8I3N2N1	Metastasis associated 1 family member 2	26	15	16	13	15	185.1	146.298	146.201	109.397	99.3572	206.722	159.2	138.492	0.869926	0.617309	-
NUCB2	A0A8I3NSK9	Nucleobindin 2	51	19	32	18	19	236.1	241.25	258.682	179.77	234.703	206.59	245.344	207.021	0.843799	0.122352	-
PRMT5	A0A8I3MPY9	Protein arginine N-methyltransferase 5	32	17	22	17	17	219.7	217.078	238.929	185.485	184.883	206.458	225.236	192.275	0.853664	0.0290508	-
EEF1D	A0A8I3RYX3	Eukaryotic translation elongation factor 1 delta	40	14	30	11	14	205.6	207.914	223.957	194.302	220.308	206.062	212.49	206.891	0.973647	0.588437	-
TSNAX	A0A8I3MGE3	Translin associated factor X	55	14	19	14	14	292	392.13	332.915	399.87	376.541	205.93	339.015	327.447	0.965878	0.87567	-
PGM3	A0A8I3NDM4	Phosphoacetylglucosamine mutase	38	17	23	17	17	240.3	201.911	202.19	205.894	209.44	205.667	214.8	207.001	0.963689	0.603536	-
ACTN2	A0A8I3N2K8	Actinin alpha 2	17	16	46	1	16	266	349.789	288.124	306.637	208.594	205.667	301.304	240.299	0.79753	0.221392	-
MYO1C	A0A8I3RXY6	Myosin IC	21	19	21	19	19	160.3	176.474	175.139	191.526	201.255	205.667	170.638	199.482	1.16904	0.0135666	-
VPS4A	A0A8I3N2G3	vesicle-fusing ATPase	23	10	14	3	10	223	117.86	101.41	118.377	133.37	205.271	147.423	152.339	1.03335	0.921573	-
DBI	A0A8I3QQH5	Diazepam binding inhibitor, acyl-CoA binding protein	29	6	20	6	6	249.2	343.943	246.478	287.86	369.061	205.007	279.874	287.31	1.02657	0.903633	-
SRP68	A0A8I3PK44	Signal recognition particle subunit SRP68	26	16	16	16	16	203.5	151.828	117.263	155.768	151.858	204.875	157.53	170.834	1.08445	0.686278	-
SIRT2	A0A8I3MYR7	NAD-dependent protein deacetylase	18	7	7	7	7	175	81.0486	117.766	103.519	91.8772	203.952	124.605	133.116	1.0683	0.859365	-
TST	A0A8I3RU67	Sulfurtransferase	60	14	51	14	14	456.5	295.282	420.233	275.288	266.881	203.688	390.672	248.619	0.636388	0.082883	-
RPL12	E2RR58	Large ribosomal subunit protein uL11	55	7	12	7	7	196	269.846	368.773	177.484	239.643	202.896	278.207	206.674	0.742881	0.287323	-
TSG101	A0A8I3P8P4	Tumor susceptibility 101	31	11	14	11	11	285	318.507	245.975	250.143	197.726	202.896	283.161	216.922	0.766074	0.0718902	-
COQ9	A0A8I3RSQ3	Ubiquinone biosynthesis protein	8	3	4	3	3	239.6	127.182	252.643	168.504	175.145	202.896	206.475	182.182	0.882343	0.608618	-
PPM1B	A0A8I3PZS8	protein-serine/threonine phosphatase	43	15	20	13	15	195.2	197.013	202.819	192.832	176.839	202.632	198.344	190.768	0.961803	0.422875	-
PPP1CA	A0A8I3NRM8	Serine/threonine-protein phosphatase	66	18	31	5	18	307.8	200.015	181.178	231.856	222.989	202.501	229.664	219.115	0.954067	0.816457	-
USP15	A0A8I3N252	Ubiquitin carboxyl-terminal hydrolase	24	21	22	20	21	209.5	215.34	202.567	191.526	205.489	202.501	209.136	199.838	0.955544	0.175101	-
GFUS	A0A8I3NTS0	GDP-L-fucose synthase	35	10	21	10	10	209.1	246.938	211.878	238.06	233.01	202.237	222.639	224.436	1.00807	0.918752	-
POLR2B	A0A8I3NPE6	DNA-directed RNA polymerase subunit beta	18	20	21	20	20	191.3	148.352	190.741	140.42	140.003	201.973	176.798	160.799	0.909507	0.561434	-
PRPS2	A0A8I3QL09	ribose-phosphate diphosphokinase	39	11	15	6	11	277.6	237.142	254.908	233.325	226.941	201.841	256.55	220.702	0.86027	0.0795613	-
PBLD	A0A8I3RRS7	Phenazine biosynthesis like protein domain containing	4	2	2	2	2	199.3	110.277	121.415	178.3	161.314	201.841	143.664	180.485	1.2563	0.321211	-
COASY	A0A8I3N4F7	Coenzyme A synthase	21	9	12	9	9	136.2	133.185	144.439	153.972	154.681	201.841	137.942	170.165	1.2336	0.174245	-
RBP4	A0A8I3PAG4	Plasma retinol-binding protein	54	11	17	11	11	76.3	143.928	115.753	160.503	170.77	201.577	111.994	177.617	1.58595	0.0577084	-
EHD4	A0A8I3Q6L5	EH domain containing 4	44	22	28	19	22	181.9	242.83	195.522	225.161	194.904	201.313	206.751	207.126	1.00182	0.986641	-
ATP5MJ	A0A8I3P7E3	ATP synthase membrane subunit j	9	1	1	1	1	434.9	99.2174	412.055	302.882	226.659	201.049	315.391	243.53	0.772153	0.580469	-
NCCRP1	A0A8I3MTC5	NCCRP1, F-box associated domain containing	50	12	45	12	12	211.4	400.188	231.128	339.62	284.1	200.917	280.905	274.879	0.978547	0.938034	-
EIF6	A0A8I3P3Q0	Eukaryotic translation initiation factor 6	57	8	10	8	8	293.9	118.018	178.285	191.689	213.392	200.917	196.734	202	1.02676	0.928327	-
SH3GL1	A0A8I3RYC4	SH3 domain containing GRB2 like 1, endophilin A2	27	11	15	11	11	232.9	255.627	231.506	185.158	211.275	200.917	240.011	199.117	0.829616	0.0199396	-
SEPTIN11	A0A8I3RYQ7	Septin	26	10	15	3	10	294.7	220.553	235.909	203.772	201.396	200.917	250.388	202.028	0.806863	0.165494	-
C1R	A0A8I3PTX7	Complement C1r	14	9	9	9	9	43.2	78.3628	74.2328	79.1902	69.5783	200.917	65.2652	116.562	1.78597	0.348695	-
ABLIM1	A0A8I3QU59	Actin binding LIM protein 1	34	22	26	22	22	340.2	258.787	212.381	225.978	211.275	200.786	270.456	212.679	0.786374	0.259773	-
LOC100686507	A0A8I3PLB8	Uncharacterized protein	27	5	14	4	5	93.5	67.4615	73.6037	153.482	180.649	200.786	78.1884	178.306	2.28046	0.00661535	UP
DPCD	A0A8I3PDQ5	Protein DPCD	19	4	4	4	4	62.4	61.4579	79.8946	54.2085	55.7473	200.786	67.9175	103.58	1.52509	0.540249	-
RANBP3	A0A8I3NM23	RAN binding protein 3	28	12	18	12	12	259.5	218.658	225.592	244.755	206.618	200.654	234.583	217.342	0.926503	0.409327	-
PNPT1	A0A8I3NB17	polyribonucleotide nucleotidyltransferase	27	20	23	20	20	201.7	117.86	220.811	160.34	170.065	200.654	180.124	177.019	0.982765	0.933614	-
UPF2	A0A8I3MCN5	UPF2 regulator of nonsense mediated mRNA decay	4	5	5	5	5	84.5	64.3017	59.3862	93.722	80.8689	200.654	69.396	125.081	1.80243	0.278222	-
GBP1	A0A8I3NW34	Guanylate binding protein 1	32	17	24	17	17	204.3	221.027	199.296	204.098	185.166	200.39	208.208	196.551	0.944015	0.255088	-
NDUFA6	A0A8I3NQX4	NADH dehydrogenase [ubiquinone] 1 alpha subcomplex subunit 6	5	1	1	1	1	367.3	74.4131	446.655	145.808	109.095	200.39	296.123	151.764	0.512505	0.32951	-
APOBEC3Z1	A0A8I3PIE8	Apolipoprotein B mRNA editing enzyme, catalytic polypeptide-like 3Z1	58	10	19	10	10	130.9	179.002	157.147	201.486	189.259	200.126	155.683	196.957	1.26511	0.0879081	-
OGA	A0A8I3P7Q3	O-GlcNAcase	22	12	13	12	12	183.3	182.162	178.788	139.277	177.262	199.862	181.417	172.134	0.948831	0.652247	-
PRKAG1	A0A8I3PK33	Protein kinase AMP-activated non-catalytic subunit gamma 1	27	8	10	7	8	199.8	230.507	220.308	229.407	217.626	199.73	216.872	215.588	0.99408	0.923073	-
WDR82	A0A8I3QC53	WD repeat domain 82	8	3	3	3	3	138.7	156.41	134.5	152.502	113.612	199.73	143.203	155.281	1.08434	0.680393	-
PFDN5	A0A8I3PBU2	Prefoldin subunit 5	65	8	14	8	8	240.4	234.772	231.38	215.365	218.05	199.598	235.517	211.004	0.895917	0.0344042	-
FDPS	A0A8I3NKA5	Farnesyl pyrophosphate synthase	40	12	20	12	12	170.6	225.293	196.78	208.507	243.595	199.071	197.558	217.057	1.0987	0.402863	-
RAB18	A0A8I3NLW8	Ras-related protein Rab-18	70	12	19	12	12	290.6	163.045	228.109	231.203	219.037	199.071	227.251	216.437	0.952412	0.79996	-
MTPN	Q863Z4	Myotrophin	63	8	16	8	8	308.5	339.52	288.753	315.128	308.657	198.807	312.258	274.197	0.878112	0.42652	-
XYLB	A0A8I3Q4W2	Xylulose kinase	41	15	26	15	15	291.5	262.895	270.258	233.162	172.04	198.807	274.884	201.336	0.732441	0.0354915	-
AUH	A0A8I3NTM7	AU RNA binding methylglutaconyl-CoA hydratase	34	11	14	11	11	289.7	64.1438	314.797	76.2512	83.5504	198.675	222.88	119.492	0.536127	0.331197	-
TOP2B	A0A8I3Q0P9	DNA topoisomerase 2	6	10	11	10	10	65.2	98.1115	73.1004	121.479	70.2839	198.543	78.804	130.102	1.65096	0.300865	-
DSC2	A0A8I3NI21	Desmocollin 1	33	24	38	24	24	240.2	263.527	456.972	432.525	652.737	198.279	320.233	427.847	1.33605	0.519721	-
RALYL	A0A8I3RZ21	RALY RNA binding protein like	3	1	3	1	1	163.7	157.832	107.071	166.054	100.204	198.147	142.868	154.802	1.08353	0.74633	-
FYCO1	A0A8I3NBX8	FYVE and coiled-coil domain autophagy adaptor 1	25	30	32	30	30	252.5	262.579	261.073	210.466	253.192	198.015	258.717	220.558	0.852505	0.14553	-
EIF4G3	A0A8I3MM37	Eukaryotic translation initiation factor 4 gamma 3	14	21	24	15	21	122.9	155.62	113.362	136.991	109.519	198.015	130.627	148.175	1.13433	0.59048	-
BPHL	A0A8I3P2J3	Biphenyl hydrolase like	42	12	22	12	12	315.1	122.442	212.381	102.866	99.7806	197.619	216.641	133.422	0.615866	0.28083	-
SMYD5	A0A8I3P2E8	Histone-lysine N-trimethyltransferase SMYD5	18	5	7	5	5	215.8	159.885	181.556	159.197	162.02	197.356	185.747	172.857	0.930606	0.563995	-
PDLIM5	A0A8I3PAU7	PDZ and LIM domain 5	39	19	28	19	19	241.9	254.047	225.089	260.756	210.005	197.224	240.345	222.662	0.926423	0.469881	-
REEP5	A0A8I3MHY0	Receptor expression-enhancing protein	10	10	19	10	10	281.4	219.763	277.681	175.035	152.564	197.092	259.615	174.897	0.673678	0.0304068	-
RBMS1	A0A8I3SCC1	RNA binding motif single stranded interacting protein 1	11	4	4	4	4	138.3	160.359	118.772	148.91	122.644	196.96	139.144	156.171	1.12237	0.540788	-
UBE2N	A0A8I3P6I7	Ubiquitin conjugating enzyme E2 N	78	10	23	10	10	281.5	271.426	229.87	272.349	252.627	196.828	260.932	240.601	0.922084	0.506554	-
LOC119863875	A0A8I3NMF4	Uncharacterized protein	71	9	21	9	9	281.5	271.426	229.87	272.349	252.627	196.828	260.932	240.601	0.922084	0.506554	-
WDR61	A0A8I3MWR4	Uncharacterized protein	43	10	14	10	10	212.2	232.403	203.951	184.015	170.347	196.828	216.185	183.73	0.849875	0.0470442	-
RPS6KA3	A0A8I3QSD1	non-specific serine/threonine protein kinase	44	27	37	19	27	213.3	207.124	172.497	194.302	160.75	196.828	197.64	183.96	0.93078	0.471656	-
TRAPPC9	A0A8I3NB69	Trafficking protein particle complex subunit 9	14	14	14	13	14	141.1	168.891	130.222	142.706	111.353	196.828	146.738	150.296	1.02425	0.905713	-
LOC100856351	A0A8I3P2J9	Uncharacterized protein	38	7	10	7	7	77.6	164.625	85.4306	103.029	86.0908	196.828	109.219	128.649	1.17791	0.684254	-
PPP1R12A	A0A8I3N244	Protein phosphatase 1 regulatory subunit	22	20	22	19	20	200.6	198.751	161.802	173.402	195.327	196.432	187.051	188.387	1.00714	0.932863	-
NAGA	A0A8I3P0J6	Alpha-galactosidase	28	9	21	9	9	277	193.063	337.193	197.731	193.634	196.432	269.085	195.932	0.728141	0.222087	-
H1-0	A0A8I3RUA8	H1.0 linker histone	28	7	11	7	7	200	132.711	161.551	188.424	204.36	196.3	164.754	196.361	1.19184	0.242909	-
LOC612587	A0A8I3S6C4	Translation initiation factor IF2/IF5 domain-containing protein	43	12	19	12	12	182.9	187.376	109.965	270.39	306.963	196.168	160.08	257.84	1.61069	0.0804981	-
FPGT	A0A8I3MTB3	Fucose-1-phosphate guanylyltransferase	29	12	12	12	12	162.4	178.054	182.94	192.669	165.266	196.168	174.465	184.701	1.05867	0.434596	-
ARFGEF1	A0A8I3PNR5	ADP ribosylation factor guanine nucleotide exchange factor 1	15	25	26	15	25	160.4	168.259	145.698	139.277	133.935	196.036	158.119	156.416	0.98923	0.941388	-
CREB1	A0A8I3PDE7	cAMP responsive element binding protein 1	5	2	2	2	2	159.8	170.629	100.403	149.727	101.192	196.036	143.611	148.985	1.03742	0.885805	-
CREM	A0A8I3MH23	cAMP responsive element modulator	5	2	2	2	2	159.8	170.629	100.403	149.727	101.192	196.036	143.611	148.985	1.03742	0.885805	-
ATF1	A0A8I3RZ79	Activating transcription factor 1	5	2	2	2	2	159.8	170.629	100.403	149.727	101.192	196.036	143.611	148.985	1.03742	0.885805	-
ZZEF1	A0A8I3MPM6	Zinc finger ZZ-type and EF-hand domain containing 1	11	27	28	27	27	187.7	223.713	210.368	196.261	197.162	195.904	207.26	196.442	0.947805	0.411603	-
IMPDH2	A0A8I3Q7R1	Inosine-5'-monophosphate dehydrogenase	30	14	16	14	14	176.8	119.282	128.712	121.806	122.362	195.772	141.598	146.647	1.03565	0.876654	-
BUB3	A0A8I3PR36	BUB3 mitotic checkpoint protein	43	11	15	11	11	240.5	226.083	165.325	207.527	166.395	195.641	210.636	189.854	0.901338	0.482953	-
STXBP2	A0A8I3PUZ4	Syntaxin binding protein 2	29	17	19	17	17	173.1	196.855	179.165	180.586	150.588	195.641	183.04	175.605	0.95938	0.654234	-
HSD17B4	A0A8I3N3S5	Hydroxysteroid 17-beta dehydrogenase 4	28	18	24	18	18	221.5	129.393	248.491	155.768	155.528	195.509	199.795	168.935	0.845541	0.490323	-
LOC610407	A0A8I3NM63	Activated RNA polymerase II transcriptional coactivator p15	46	7	11	7	7	196.9	82.4705	120.156	149.89	90.0425	195.509	133.176	145.147	1.08989	0.805393	-
SUB1	A0A8I3MEC8	Activated RNA polymerase II transcriptional coactivator p15	47	7	11	7	7	196.9	82.4705	120.156	149.89	90.0425	195.509	133.176	145.147	1.08989	0.805393	-
SHMT2	A0A8I3N480	Serine hydroxymethyltransferase	31	14	16	14	14	146.3	92.4239	165.703	133.562	129.842	195.377	134.809	152.927	1.1344	0.584853	-
HMGCL	A0A8I3P3W0	Hydroxymethylglutaryl-CoA lyase, mitochondrial	45	12	16	12	12	221.4	122.284	203.197	136.338	130.971	195.245	182.293	154.184	0.845803	0.492671	-
NUDCD2	A0A8I3MFP8	NudC domain containing 2	24	4	6	4	4	162.8	279.799	124.938	190.71	85.1028	194.981	189.179	156.931	0.829538	0.614658	-
GYG1	A0A8I3PGI9	Glycogenin 1	24	9	15	9	9	243.2	249.308	224.586	287.207	232.163	194.849	239.031	238.073	0.995992	0.975297	-
RIDA	A0A8I3PQP9	2-iminobutanoate/2-iminopropanoate deaminase	61	5	14	5	5	131.6	195.907	87.8212	168.667	124.761	194.849	138.443	162.759	1.17564	0.557047	-
NT5C2	A0A8I3QC03	5'-nucleotidase, cytosolic II	35	18	21	18	18	380	318.665	314.042	303.045	398.134	194.717	337.569	298.632	0.884655	0.585093	-
PRTFDC1	A0A8I3MX39	Phosphoribosyl transferase domain containing 1	4	1	3	1	1	125.2	130.499	125.315	127.847	148.471	194.717	127.005	157.012	1.23627	0.267856	-
TUBB	A0A8I3MY05	Tubulin beta chain	81	26	148	4	26	251.3	102.219	160.418	80.0066	136.475	194.717	171.313	137.066	0.800095	0.566585	-
GPHN	A0A8I3MJA2	Gephyrin	37	22	30	22	22	319.8	164.625	187.469	184.505	200.408	194.585	223.965	193.166	0.862484	0.589986	-
ADD1	A0A8I3NKL6	Adducin 1	21	10	10	9	10	117.9	106.327	87.4437	129.807	87.5021	194.585	103.89	137.298	1.32157	0.397458	-
PCBD1	A0A8I3MQ42	4a-hydroxytetrahydrobiopterin dehydratase	64	7	12	6	7	274.4	256.891	293.157	179.77	265.752	194.321	274.816	213.281	0.776087	0.133671	-
ARL3	A0A8I3PXS5	ADP ribosylation factor like GTPase 3	31	7	9	7	7	162.7	64.6177	69.7033	70.863	59.8401	194.321	99.007	108.341	1.09428	0.870929	-
PSMB2	A0A8I3NUC6	Proteasome subunit beta	30	8	16	8	8	225.3	297.494	331.028	244.265	356.924	194.189	284.607	265.126	0.93155	0.753843	-
LOC102151683	A0A8I3P1P6	Signal recognition particle 14 kDa protein	18	2	2	2	2	74.4	113.436	77.2524	151.686	130.265	194.189	88.363	158.714	1.79615	0.0430141	UP
SRP14	A0A8I3PW27	Signal recognition particle 14 kDa protein	19	2	2	2	2	74.4	113.436	77.2524	151.686	130.265	194.189	88.363	158.714	1.79615	0.0430141	UP
LOC102155595	A0A8I3PWR5	Signal recognition particle 14 kDa protein	18	2	2	2	2	74.4	113.436	77.2524	151.686	130.265	194.189	88.363	158.714	1.79615	0.0430141	UP
NFKB2	A0A8I3PK60	Nuclear factor kappa B subunit 2	28	23	26	22	23	256.8	268.266	221.566	224.998	207.182	193.926	248.877	208.702	0.838573	0.0849878	-
CLUH	A0A8I3NKA7	Clustered mitochondria protein homolog	18	23	26	23	23	261.9	232.877	235.658	201.649	202.807	193.662	243.478	199.373	0.818853	0.032021	-
PPM1A	A0A8I3S5K7	protein-serine/threonine phosphatase	41	12	18	10	12	179.2	203.175	213.891	210.63	193.634	193.662	198.755	199.308	1.00278	0.965206	-
SMARCA5	A0A8I3NHW1	Uncharacterized protein	13	12	12	12	12	145.9	175.368	178.285	195.281	140.286	193.662	166.518	176.41	1.0594	0.665398	-
PRPF6	A0A8I3P8N8	Pre-mRNA processing factor 6	18	18	18	18	18	201.1	141.559	167.464	158.054	129.277	193.662	170.041	160.331	0.942896	0.721534	-
TBCB	A0A8I3MCE5	Tubulin folding cofactor B	53	11	16	11	11	264	358.794	235.28	277.574	283.253	193.266	286.025	251.364	0.878819	0.506741	-
RUFY1	A0A8I3NKP5	RUN and FYVE domain containing 1	21	12	12	11	12	217.7	122.442	165.074	153.319	183.754	193.266	168.405	176.78	1.04973	0.800306	-
CKAP5	A0A8I3PUX4	Cytoskeleton associated protein 5	18	29	32	29	29	170.5	209.494	129.97	195.771	140.991	193.002	169.988	176.588	1.03883	0.832119	-
TMEM91	A0A8I3MKL0	2-oxoisovalerate dehydrogenase subunit alpha	27	10	14	10	10	176.7	121.968	215.778	154.625	166.818	192.87	171.482	171.438	0.999742	0.998907	-
CHMP2A	A0A8I3MUN9	Charged multivesicular body protein 2A	19	6	8	6	6	109.9	212.496	82.6626	212.262	191.658	192.738	135.02	198.886	1.47302	0.245505	-
DDT	A0A8I3Q0N2	Uncharacterized protein	42	6	24	6	6	344.5	409.983	364.37	366.234	331.943	192.474	372.951	296.884	0.79604	0.286769	-
DNAJC3	A0A8I3NML8	DnaJ heat shock protein family (Hsp40) member C3	33	14	17	14	14	340.3	284.697	338.074	203.282	280.712	192.211	321.024	225.402	0.702134	0.0540546	-
PIK3CB	A0A8I3PX85	phosphatidylinositol-4,5-bisphosphate 3-kinase	15	15	16	15	15	213.9	226.873	215.904	206.221	231.457	191.947	218.892	209.875	0.958804	0.524554	-
DYNLT4	A0A8I3PSA3	Dynein light chain Tctex-type 4	4	1	1	1	1	19.7	16.5889	30.6997	25.4715	39.0937	191.947	22.3295	85.504	3.82919	0.358028	-
SEPTIN8	A0A8I3NJ40	Septin	40	13	18	9	13	189.2	225.767	194.515	204.752	208.17	191.815	203.161	201.579	0.992214	0.907626	-
GPX1	A0A8I3PT87	Glutathione peroxidase	79	13	29	13	13	198.5	189.903	207.726	213.732	173.028	191.815	198.71	192.858	0.970553	0.682226	-
CIAPIN1	A0A8I3MPT1	Anamorsin	29	8	9	8	8	129.9	219.921	129.97	218.793	280.43	191.287	159.931	230.17	1.43919	0.154558	-
SLIRP	A0A8I3MXD8	Uncharacterized protein	22	2	2	2	2	129.9	112.647	145.194	108.091	125.326	191.287	129.247	141.568	1.09533	0.684712	-
LOC607817	A0A8I3Q4W8	Uncharacterized protein	34	6	15	6	6	255.6	239.512	193.76	246.388	241.901	191.155	229.624	226.481	0.986313	0.908322	-
SETD3	E2RBS6	Actin-histidine N-methyltransferase	19	10	11	10	10	167.5	212.812	175.391	168.667	146.919	191.023	185.234	168.87	0.911655	0.435942	-
PEX26	A0A8I3QB72	Tubulin alpha chain	29	12	67	2	12	61.1	35.8636	45.1688	40.4931	31.4725	190.891	47.3775	87.619	1.84938	0.518807	-
NSUN2	A0A8I3S429	tRNA (cytosine(34)-C(5))-methyltransferase	28	17	21	17	17	256.6	165.731	190.741	176.831	155.246	190.364	204.357	174.147	0.852168	0.385356	-
ACSS1	A0A8I3S6S5	Acetyl-coenzyme A synthetase	25	17	21	17	17	208.7	118.65	221.314	139.93	151.153	190.364	182.888	160.482	0.877488	0.577469	-
LOC119866711	A0A8I3PPR8	RRM domain-containing protein	21	9	12	9	9	619.9	96.5316	117.011	107.601	116.858	190.364	277.814	138.274	0.497721	0.501573	-
RBM14	A0A8I3NNH2	RNA binding motif protein 14	29	14	15	9	14	222.1	107.749	97.635	141.726	115.729	190.364	142.495	149.273	1.04757	0.890764	-
HSDL2	A0A8I3MXG8	Hydroxysteroid dehydrogenase like 2	39	16	20	16	16	136.8	95.1097	166.583	102.866	94.6998	190.364	132.831	129.31	0.97349	0.929303	-
PSMA2	A0A8I3PCE5	Proteasome subunit alpha type	67	14	46	14	14	214.6	305.078	301.586	205.078	250.087	190.232	273.755	215.132	0.785857	0.180733	-
CLUAP1	A0A8I3MSN9	Clusterin associated protein 1	3	1	1	1	1	25.2	20.5386	24.1571	20.8997	27.9442	190.232	23.2986	79.6919	3.42046	0.415172	-
DNAI1	A0A8I3S7V9	Dynein axonemal intermediate chain 1	11	5	5	5	5	24.5	27.6482	34.6	36.4112	36.6944	190.1	28.9161	87.7351	3.03413	0.369318	-
ETFB	A0A8I3NSY7	Electron transfer flavoprotein subunit beta	43	15	22	15	15	246.2	117.228	226.85	152.666	173.593	189.968	196.76	172.075	0.874547	0.60621	-
TBL1X	A0A8I3PUV7	Uncharacterized protein	26	11	13	5	11	177.5	183.584	149.095	178.953	171.335	189.704	170.06	179.997	1.05844	0.465603	-
ACAT2	A0A8I3N041	Acetyl-CoA acetyltransferase 2	59	14	24	14	14	243.7	192.747	224.082	229.57	298.777	189.308	220.177	239.218	1.08648	0.628674	-
ESRP1	A0A8I3P565	Epithelial splicing regulatory protein 1	30	12	17	11	12	324.2	236.036	271.138	255.531	169.359	189.308	277.125	204.733	0.738774	0.118641	-
LOC100684058	A0A8I3P164	STAM binding protein	29	10	12	10	10	192.9	247.254	180.172	165.891	155.669	189.308	206.775	170.289	0.823549	0.212112	-
COPS2	A0A8I3PM77	COP9 signalosome subunit 2	45	16	27	16	16	208.2	228.927	250.127	205.568	249.099	189.176	229.085	214.614	0.936835	0.544167	-
EAF1	A0A8I3Q0N9	ELL associated factor 1	4	2	2	2	2	139.7	122.126	139.532	179.77	174.299	189.176	133.786	181.082	1.35352	0.00377002	-
CSRP1	A0A8I3P401	Uncharacterized protein	57	8	12	8	8	125.6	200.647	67.3128	210.793	288.051	189.044	131.187	229.296	1.74786	0.119542	-
TRIM16	A0A8I3MVX4	Tripartite motif containing 16	34	15	21	15	15	218.7	289.911	252.643	223.365	231.034	188.913	253.751	214.437	0.845068	0.194124	-
MAT2B	A0A8I3RP35	Methionine adenosyltransferase 2 subunit beta	45	16	21	16	16	244.9	222.291	206.719	176.668	153.834	188.781	224.637	173.094	0.770551	0.0271672	-
SRSF2	A0A8I3NZR1	Serine and arginine rich splicing factor 2	11	2	3	2	2	111.7	54.3484	82.7884	72.659	69.4371	188.781	82.9456	110.292	1.32969	0.571424	-
RPL23	A0A8I3NHL0	Large ribosomal subunit protein uL14	34	5	8	5	5	106.8	85.3144	109.336	110.376	117.704	188.649	100.483	138.91	1.38241	0.259909	-
IRF3	A0A8I3PLU0	Interferon regulatory factor 3	32	10	15	10	10	113.2	197.487	130.348	161.319	164.137	188.253	147.012	171.236	1.16478	0.450787	-
CLN5	Q5JZQ9	Ceroid-lipofuscinosis neuronal protein 5	24	8	9	8	8	132.8	133.501	191.621	145.971	130.124	188.253	152.641	154.783	1.01403	0.938574	-
LOC119868887	A0A8I3SA14	Aldehyde dehydrogenase	32	17	25	15	17	443.8	189.113	447.284	258.633	233.856	188.121	360.066	226.87	0.63008	0.256433	-
LOC119881481	A0A8I3S2H0	Aldehyde dehydrogenase	33	16	23	14	16	342.6	152.934	320.459	231.039	206.336	188.121	271.998	208.499	0.766546	0.400685	-
ENSA	A0A8I3P4A0	Endosulfine alpha	60	7	7	7	7	271.6	262.737	92.9797	130.46	183.896	188.121	209.105	167.492	0.800993	0.555031	-
TEP1	A0A8I3PIH0	Telomerase associated protein 1	10	21	21	21	21	90.6	181.056	140.036	128.99	115.023	187.989	137.231	144.001	1.04933	0.853823	-
C7	A0A8I3MQ72	Complement C7	24	20	23	20	20	118.1	168.101	206.845	162.952	238.655	187.857	164.349	196.488	1.19556	0.399046	-
RIPK1	A0A8I3S2L7	Receptor interacting serine/threonine kinase 1	26	13	17	13	13	221.6	247.412	226.347	241.489	186.436	187.857	231.786	205.261	0.885561	0.280236	-
CLEC3B	A0A8I3NNJ6	C-type lectin domain family 3 member B	52	9	12	9	9	96.9	147.878	282.588	217.161	183.049	187.857	175.789	196.022	1.1151	0.752032	-
QSOX1	A0A8I3MP41	Sulfhydryl oxidase	30	15	18	15	15	126.9	135.555	253.021	163.932	180.791	187.857	171.825	177.527	1.03318	0.902175	-
SRP54	P61010	Signal recognition particle subunit SRP54	30	13	14	13	13	162.4	186.902	124.308	164.912	134.499	187.725	157.87	162.379	1.02856	0.859563	-
SLC11A2	A0A8I3NMI2	Natural resistance-associated macrophage protein 1	11	6	7	6	6	192.7	103.641	117.388	115.111	163.855	187.593	137.91	155.52	1.12769	0.642451	-
IDH3A	A0A8I3NG17	Isocitrate dehydrogenase [NAD] subunit, mitochondrial	41	13	19	13	13	161.7	75.835	144.817	117.397	96.5346	187.593	127.451	133.842	1.05015	0.874802	-
GRB2	A0A8I3PT69	Growth factor receptor bound protein 2	46	8	8	8	8	166.1	249.465	211.878	214.222	213.11	187.329	209.148	204.887	0.979628	0.880488	-
BCAT2	A0A8I3MBI0	Branched-chain-amino-acid aminotransferase	24	12	17	12	12	277.5	170.787	261.199	208.833	212.828	187.198	236.495	202.953	0.858169	0.420076	-
EXOC6B	A0A8I3P546	Exocyst complex component	23	17	17	17	17	158	164.941	166.961	196.424	151.858	187.066	163.301	178.449	1.09277	0.380541	-
GLTP	A0A8I3PM85	Glycolipid transfer protein	71	13	18	13	13	199.5	267.792	204.581	270.063	257.143	186.802	223.958	238.003	1.06271	0.700747	-
TRAPPC8	A0A8I3N3C3	Trafficking protein particle complex subunit 8	15	19	22	2	19	201.3	211.074	190.489	200.506	183.049	186.67	200.954	190.075	0.945861	0.245154	-
ATG5	A0A8I3RU83	Autophagy protein 5	40	10	11	10	10	175.9	204.122	171.49	195.118	176.98	186.538	183.838	186.212	1.01292	0.849537	-
GRIPAP1	A0A8I3SCW8	GRIP1 associated protein 1	34	26	26	26	26	195.1	160.833	181.556	206.058	182.766	186.406	179.163	191.743	1.07022	0.369792	-
LOC119871538	A0A8I3MWM4	Uncharacterized protein	16	2	2	2	2	102.3	22.5925	28.0575	96.4977	37.1178	186.406	50.9833	106.674	2.09233	0.344508	-
C2CD5	A0A8I3NMF1	C2 calcium dependent domain containing 5	12	12	12	12	12	159.4	201.437	213.262	206.548	179.379	186.142	191.366	190.69	0.996465	0.972831	-
ABCE1	A0A8I3RWT2	ATP binding cassette subfamily E member 1	38	20	23	20	20	172.4	188.008	159.412	177.974	171.476	186.142	173.273	178.531	1.03034	0.61125	-
LRG1	A0A8I3NTN1	Leucine rich alpha-2-glycoprotein 1	34	10	15	10	10	66.4	112.015	148.088	114.622	142.403	186.142	108.834	147.722	1.35731	0.285504	-
PC	A0A8I3NKZ1	Pyruvate carboxylase	26	24	26	24	24	224.8	122.6	212.255	173.239	164.137	186.01	186.552	174.462	0.935193	0.745517	-
METAP1	A0A8I3PV39	Methionine aminopeptidase	27	8	10	8	8	248.5	272.374	164.57	229.243	218.05	185.878	228.481	211.057	0.923738	0.658944	-
PRKCD	Q5PU49	Protein kinase C delta type	27	17	24	17	17	209.4	243.778	227.479	235.938	208.311	185.746	226.886	209.999	0.925569	0.397851	-
FAM3C	A0A8I3N7J4	FAM3 metabolism regulating signaling molecule C	35	7	7	7	7	180.2	174.736	207.097	171.606	152	185.483	187.344	169.696	0.905797	0.274314	-
PON1	A0A8I3PDF6	Paraoxonase	27	8	16	8	8	191.6	121.968	168.219	99.9266	98.9338	185.351	160.596	128.07	0.797471	0.412841	-
BOD1L1	A0A8I3MF24	Biorientation of chromosomes in cell division 1 like 1	1	2	2	2	2	49.9	49.4507	58.3797	34.7784	35.7065	185.351	52.5768	85.2785	1.62198	0.580687	-
THUMPD1	A0A8I3N3C4	THUMP domain containing 1	50	16	20	16	16	272.5	180.582	176.397	168.993	143.955	185.219	209.826	166.056	0.791396	0.296747	-
SKP1	A0A8I3NPT2	S-phase kinase-associated protein 1	90	13	20	13	13	169.6	173.315	172.874	175.361	180.367	185.087	171.93	180.272	1.04852	0.0808652	-
HNRNPH3	A0A8I3MEY1	Heterogeneous nuclear ribonucleoprotein H3	14	4	6	3	4	208.2	172.525	146.452	159.033	164.278	185.087	175.726	169.466	0.964379	0.771906	-
EIF3G	A0A8I3P751	Eukaryotic translation initiation factor 3 subunit G	33	10	13	10	10	223.9	270.004	181.682	194.955	169.5	184.955	225.195	183.137	0.813235	0.23629	-
NIT1	A0A8I3Q4L6	Nitrilase 1	26	11	12	11	11	143	92.2659	161.551	121.806	120.95	184.955	132.272	142.57	1.07786	0.745702	-
BCLAF1	A0A8I3MRT4	BCL2 associated transcription factor 1	13	8	10	8	8	154	68.5675	122.924	68.2505	82.9858	184.955	115.164	112.064	0.97308	0.948088	-
MOB1A	A0A8I3P9B2	MOB kinase activator 1A	26	6	7	6	6	169.2	233.667	148.717	200.343	165.548	184.691	183.861	183.527	0.998184	0.991184	-
MOB1B	A0A8I3NJL7	MOB kinase activator 1B	26	6	7	6	6	169.2	233.667	148.717	200.343	165.548	184.691	183.861	183.527	0.998184	0.991184	-
PAM16	A0A8I3MHR4	Coronin	25	18	21	18	18	208.8	307.922	253.146	259.94	204.077	184.427	256.623	216.148	0.84228	0.332942	-
FCSK	A0A8I3RTZ0	Fucose kinase	29	24	29	24	24	201.5	250.729	235.029	195.771	177.121	184.427	229.086	185.773	0.810932	0.0821219	-
H2AZ1	A0A8I3PL79	Histone H2A	31	4	10	2	4	194.4	284.855	99.1448	65.3115	96.5346	184.295	192.8	115.38	0.598446	0.304513	-
H2AZ2	A0A8I3N845	Histone H2A	30	3	7	2	3	194.4	284.855	99.1448	65.3115	96.5346	184.295	192.8	115.38	0.598446	0.304513	-
UROS	A0A8I3PZJ5	uroporphyrinogen-III synthase	17	4	4	4	4	66.1	86.8943	82.2852	79.5167	65.7677	184.295	78.4265	109.86	1.4008	0.490607	-
EPX	A0A8I3NYF9	Eosinophil peroxidase	4	3	4	3	3	72.5	85.4723	126.322	226.468	186.859	184.163	94.7646	199.163	2.10166	0.00851121	UP
SBDS	A0A8I3MC14	Ribosome maturation protein SBDS	58	15	18	15	15	174.1	194.011	105.31	253.735	222.284	184.031	157.807	220.017	1.39421	0.143238	-
LOC119864225	A0A8I3MVJ3	Ribosome maturation protein SBDS	54	14	17	14	14	174.1	194.011	105.31	253.735	222.284	184.031	157.807	220.017	1.39421	0.143238	-
IFT22	A0A8I3MN31	Intraflagellar transport 22	22	3	3	3	3	21.1	18.9587	25.0378	31.1862	23.1457	184.031	21.6989	79.4544	3.66169	0.38483	-
HBS1L	A0A8I3MW83	HBS1-like protein	27	14	16	14	14	130.2	154.514	159.286	200.833	177.686	183.636	148	187.385	1.26611	0.0284444	-
GOLGA4	A0A8I3Q4V2	Golgin A4	11	21	21	20	21	203.4	161.781	103.423	128.827	116.716	183.504	156.201	143.016	0.915586	0.731366	-
NACA	A0A8I3N7T5	Nascent polypeptide associated complex subunit alpha	33	5	11	5	5	197.8	142.033	95.9994	126.704	137.886	182.58	145.277	149.057	1.02602	0.918135	-
CTSH	A0A8I3MSD7	Cathepsin H	41	12	16	12	12	208.2	194.485	243.584	272.839	276.902	182.448	215.423	244.063	1.13295	0.46571	-
ARHGAP18	A0A8I3MIB6	Rho GTPase activating protein 18	34	19	21	19	19	267.6	245.99	176.523	232.999	157.786	182.448	230.038	191.078	0.830637	0.334048	-
SQOR	A0A8I3S7U5	Sulfide quinone oxidoreductase	50	17	20	17	17	142	131.131	265.98	215.528	203.372	182.316	179.704	200.405	1.1152	0.682683	-
NDUFA9	A0A8I3Q6U1	NADH:ubiquinone oxidoreductase subunit A9	14	6	6	6	6	230.7	128.919	232.512	184.832	159.48	182.316	197.377	175.543	0.889376	0.592435	-
CLIC4	A0A8I3NSF2	Chloride intracellular channel protein	51	10	17	10	10	123.3	166.837	145.823	190.383	140.709	182.316	145.32	171.136	1.17765	0.266298	-
RBM25	A0A8I3NBF1	RNA binding motif protein 25	10	7	8	7	7	127.1	141.875	126.322	131.276	103.027	182.316	131.765	138.873	1.05394	0.790756	-
GYS2	A0A8I3NVF0	Glycogen [starch] synthase	1	1	1	1	1	226.8	191.325	158.405	94.5384	89.0545	182.316	192.177	121.97	0.634675	0.135026	-
MAP1A	A0A8I3PPF3	Microtubule associated protein 1A	5	10	10	9	10	42.5	45.185	45.5462	56.6577	47.8439	182.316	44.4104	95.606	2.15278	0.359711	-
RPS6	A0A8I3NUU7	40S ribosomal protein S6	28	10	16	10	10	167.1	155.936	151.863	183.852	203.09	182.184	158.299	189.709	1.19842	0.0227551	-
SF3A3	E2QXU5	Matrin-type domain-containing protein	33	14	17	14	14	194.1	169.523	147.082	139.277	125.326	182.184	170.235	148.929	0.874844	0.387203	-
RNASEL	A0A8I3MT16	Ribonuclease L	15	12	12	12	12	155.3	200.805	174.384	242.795	151.435	182.053	176.83	192.094	1.08632	0.645993	-
CHMP2B	A0A8I3PS98	Charged multivesicular body protein 2B	17	4	4	4	4	102.4	69.0414	106.694	79.8433	108.39	182.053	92.7118	123.429	1.33131	0.426338	-
ITPA	A0A8I3RYQ0	Inosine triphosphate pyrophosphatase	38	9	15	9	9	320.2	263.053	262.331	244.102	185.871	181.921	281.861	203.965	0.723635	0.048719	-
RBM10	A0A8I3Q4U3	RNA binding motif protein 10	4	5	5	5	5	144	142.349	120.786	127.031	125.326	181.921	135.711	144.759	1.06667	0.686152	-
AFDN	A0A8I3MS32	Afadin, adherens junction formation factor	16	23	28	23	23	201	185.638	166.583	231.203	218.473	181.789	184.407	210.488	1.14143	0.22742	-
ARFGAP3	A0A8I3NUI5	ADP ribosylation factor GTPase activating protein 3	16	9	11	9	9	218.8	160.833	138.4	140.42	133.652	181.789	172.678	151.954	0.879983	0.511485	-
AP1M1	A0A8I3Q641	AP-1 complex subunit mu-1	41	14	17	10	14	182.8	250.097	171.239	198.22	147.201	181.657	201.379	175.693	0.872449	0.432725	-
DCTD	A0A8I3P3H5	dCMP deaminase	40	8	13	8	8	69.7	76.309	65.4255	82.9456	72.6832	181.657	70.4782	112.429	1.59523	0.350495	-
TRAPPC10	A0A8I3NX57	Trafficking protein particle complex subunit 10	19	19	19	19	19	175	193.379	153.247	165.565	135.91	181.525	173.875	161	0.925951	0.50791	-
COG4	A0A8I3RSJ0	Conserved oligomeric Golgi complex subunit 4	17	11	13	11	11	176.8	172.525	164.822	149.563	131.112	181.393	171.382	154.023	0.898709	0.358672	-
NHLRC2	A0A8I3Q4A4	NHL repeat containing 2	36	22	32	22	22	201.9	200.805	246.226	206.874	202.102	181.261	216.31	196.746	0.909552	0.330179	-
SH3BGRL	A0A8I3PBA6	SH3 domain-binding glutamic acid-rich-like protein	91	11	17	11	11	199.5	230.823	181.053	231.203	202.948	181.129	203.792	205.093	1.00639	0.952469	-
SMS	A0A8I3QWI4	PABS domain-containing protein	56	16	18	16	16	311.8	174.42	172.623	152.502	201.537	181.129	219.614	178.389	0.812285	0.470193	-
TLR9	A0A8I3SCS1	Twinfilin actin binding protein 2	39	15	24	12	15	153	303.814	172.623	178.627	172.605	181.129	209.812	177.454	0.845774	0.564993	-
PAAF1	A0A8I3MUL8	Proteasomal ATPase associated factor 1	15	6	7	6	6	206.6	176	175.642	161.483	152.564	181.129	186.081	165.059	0.887026	0.191319	-
GPT2	A0A8I3NXZ1	alanine transaminase	34	12	13	12	12	253.3	113.594	200.303	147.604	119.539	181.129	189.066	149.424	0.790329	0.443774	-
EIF3H	A0A8I3NST4	Eukaryotic translation initiation factor 3 subunit H	53	15	20	15	15	194.1	206.018	171.994	156.584	130.689	180.865	190.704	156.046	0.818263	0.129048	-
ABRAXAS2	A0A8I3PLR3	Abraxas 2, BRISC complex subunit	15	6	6	6	6	183.4	154.83	167.213	209.16	165.689	180.601	168.481	185.15	1.09894	0.343776	-
CRIP1	A0A8I3PT20	Cysteine rich protein 1	23	2	3	2	2	104.5	60.984	44.5397	53.5554	83.5504	180.47	70.0079	105.858	1.51209	0.461986	-
SRSF10	A0A8I3NPF5	Serine and arginine rich splicing factor 10	14	3	5	3	3	70.3	49.7667	47.811	57.6374	52.0779	180.47	55.9592	96.7282	1.72855	0.433915	-
AKT3	A0A8I3MPC6	AKT serine/threonine kinase 3	10	3	4	1	3	125.2	167.469	134.122	149.4	120.809	180.338	142.264	150.182	1.05566	0.732346	-
TTC1	A0A8I3MNS2	Tetratricopeptide repeat domain 1	26	5	7	5	5	179.8	145.508	128.838	128.011	93.853	180.338	151.382	134.067	0.88562	0.592804	-
GAK	A0A8I3MIP1	Cyclin G associated kinase	14	16	17	16	16	83.8	124.496	110.468	72.8223	64.2152	180.338	106.255	105.792	0.995642	0.991488	-
LSM6	A0A8I3NQ41	Sm domain-containing protein	23	5	6	5	5	243.9	157.2	150.479	140.583	144.802	180.074	183.859	155.153	0.843867	0.450327	-
ATG7	A0A8I3N5G0	Ubiquitin-like modifier-activating enzyme ATG7	24	15	20	15	15	206.6	204.596	165.577	177.157	175.992	179.942	192.258	177.697	0.924265	0.389379	-
RBBP4	A0A8I3N0Q4	RB binding protein 4, chromatin remodeling factor	22	8	11	8	8	180.6	197.013	186.84	185.974	150.165	179.942	188.151	172.027	0.914303	0.281928	-
SEC24D	A0A8I3SCF9	SEC24 homolog D, COPII coat complex component	14	12	13	11	12	186.8	267.95	232.89	227.611	161.738	179.81	229.213	189.719	0.827698	0.268805	-
PYCARD	A0A8I3RYZ8	PYD and CARD domain containing	58	12	14	12	12	150.9	261.947	129.97	180.423	162.726	179.678	180.939	174.276	0.963173	0.8863	-
PCNA	A0A8I3QKL0	Proliferating cell nuclear antigen	36	7	9	7	7	151.9	102.851	114.62	97.6407	86.0908	179.678	123.124	121.136	0.983858	0.955775	-
XRCC5	A0A8I3S4D5	X-ray repair cross-complementing protein 5	25	16	19	16	16	145.3	243.146	213.639	223.365	170.065	179.546	200.695	190.992	0.951652	0.788853	-
PROC	Q28278	Vitamin K-dependent protein C	16	4	4	4	4	98.8	148.668	158.028	177.647	194.904	179.414	135.165	183.988	1.36121	0.107253	-
OXR1	A0A8I3RW23	Oxidation resistance 1	24	16	20	16	16	247.9	282.011	236.287	243.612	183.472	179.414	255.399	202.166	0.791568	0.109675	-
NOLC1	A0A8I3PHD1	Nucleolar and coiled-body phosphoprotein 1	5	4	4	4	4	107.9	86.1043	87.5695	85.0682	72.8243	179.414	93.8579	112.436	1.19793	0.639425	-
IFT80	A0A8I3Q161	Intraflagellar transport 80	10	8	8	8	8	49.1	34.7577	36.3615	35.9213	31.0491	179.414	40.0731	82.1282	2.04946	0.478869	-
F11R	A0A8I3Q3F8	Junctional adhesion molecule A	29	8	11	8	8	211.6	237.932	208.103	243.612	205.63	179.282	219.212	209.508	0.955733	0.674642	-
NECAP1	A0A8I3PH28	NECAP endocytosis associated 1	19	3	3	3	3	184.9	228.769	136.89	151.033	123.632	179.282	183.52	151.316	0.82452	0.369288	-
CFAP52	A0A8I3MPI2	Cilia and flagella associated protein 52	14	8	8	8	8	38.2	30.334	45.2946	49.4735	61.6749	179.282	37.9429	96.8102	2.55147	0.290297	-
LOC608048	A0A8I3N678	ATP synthase subunit f, mitochondrial	16	2	2	2	2	715.5	222.133	592.982	521.349	283.958	179.018	510.205	328.109	0.643092	0.374934	-
DAZAP1	A0A8I3RX28	DAZ associated protein 1	27	7	10	7	7	280.1	110.277	142.804	181.239	163.29	179.018	177.727	174.516	0.981934	0.956554	-
DNAJA4	A0A8I3N0F1	DnaJ heat shock protein family (Hsp40) member A4	16	6	6	6	6	58.4	47.0809	50.0757	47.5141	34.2952	179.018	51.8522	86.9425	1.67674	0.52707	-
LSM3	A0A8I3RUC8	U6 snRNA-associated Sm-like protein LSm3	20	2	3	2	2	207.9	149.142	127.58	176.831	150.588	178.886	161.541	168.769	1.04474	0.799438	-
ILK	A0A8I3N6J1	Integrin-linked protein kinase	17	8	9	8	8	141.1	133.975	125.189	128.664	103.45	178.886	133.421	137	1.02682	0.887916	-
MAP1B	A0A8I3RQP4	Microtubule associated protein 1B	3	7	7	6	7	40.3	42.4992	49.9499	50.1266	47.5616	178.623	44.2497	92.1036	2.08145	0.383928	-
PRRC1	A0A8I3NK09	Proline rich coiled-coil 1	24	9	17	9	9	198.4	187.85	164.193	142.216	149.177	177.699	183.481	156.364	0.852209	0.141958	-
CTSA	A0A8I3NUV8	Carboxypeptidase	23	9	24	9	9	212.2	108.539	133.116	121.316	147.907	177.699	151.285	148.974	0.984725	0.951854	-
AKR1B1	A0A8I3P2L6	Aldo-keto reductase family 1 member B	46	11	13	11	11	139.4	169.839	140.791	165.891	357.912	177.567	150.01	233.79	1.5585	0.309149	-
DLG1	A0A8I3Q716	Discs large MAGUK scaffold protein 1	18	16	19	11	16	209.9	220.395	221.063	252.755	204.924	177.567	217.119	211.749	0.975265	0.830857	-
ALPL	A0A8I3MGB5	Alkaline phosphatase	20	9	10	9	9	47.8	37.4435	59.3862	86.8643	61.9571	177.567	48.2099	108.796	2.25672	0.22408	-
IFGGB2	J7NP21	Interferon-gamma-inducible GTPase IFGGB2 protein	38	16	21	11	16	496.3	276.482	876.073	163.932	159.48	177.171	549.618	166.861	0.303594	0.160312	-
ANP32E	A0A8I3NYI4	Acidic leucine-rich nuclear phosphoprotein 32 family member	20	5	9	5	5	197.9	133.501	185.205	93.722	85.5262	177.171	172.202	118.807	0.689926	0.214572	-
PPM1L	A0A8I3Q4M2	Protein phosphatase, Mg2+/Mn2+ dependent 1L	3	1	2	1	1	306.4	161.149	221.063	151.523	151.012	177.04	229.537	159.858	0.696435	0.237155	-
CTSL	Q9GL24	Procathepsin L	40	11	21	11	11	213.4	116.754	387.143	138.46	143.108	177.04	239.099	152.869	0.639356	0.389626	-
TRAF6	A0A8I3PHD6	TNF receptor-associated factor	10	5	6	5	5	160.6	206.334	182.437	203.119	176.274	176.908	183.124	185.434	1.01261	0.892443	-
PBDC1	A0A8I3Q921	Polysaccharide biosynthesis domain containing 1	58	12	17	12	12	202.9	60.826	206.09	240.673	246.558	176.776	156.605	221.336	1.41333	0.312747	-
TCERG1	A0A8I3PGS6	Transcription elongation regulator 1	14	13	14	13	13	168.8	139.821	109.839	143.849	130.971	176.776	139.487	150.532	1.07918	0.640415	-
RABGAP1	A0A8I3NMR4	RAB GTPase activating protein 1	19	20	21	16	20	187.7	215.972	180.675	181.403	188.553	176.644	194.782	182.2	0.935402	0.365231	-
EXOC5	A0A8I3PAA1	Exocyst complex component 5	29	19	22	19	19	202.2	193.063	190.615	208.67	170.488	176.38	195.293	185.179	0.948215	0.488524	-
TGM7	A0A8I3PL22	Transglutaminase 7	26	17	22	16	17	284.5	181.056	377.455	327.047	719.916	175.852	281.004	407.605	1.45053	0.524522	-
RIC8A	A0A8I3S6N3	Synembryn	10	5	5	5	5	144	182.004	152.995	98.2938	142.685	175.852	159.666	138.944	0.870212	0.471992	-
LRRC47	A0A8I3S4G6	Leucine rich repeat containing 47	36	17	23	17	17	183.7	191.957	144.943	188.26	183.19	175.456	173.533	182.302	1.05053	0.611043	-
RAP1GDS1	A0A8I3PH84	Rap1 GTPase-GDP dissociation stimulator 1	26	16	19	16	16	138	185.48	147.962	141.236	138.874	175.325	157.147	151.812	0.966046	0.789503	-
PSMA8	A0A8I3RZP6	Proteasome subunit alpha type	25	5	17	5	5	184	237.458	201.183	228.917	206.336	175.193	207.547	203.482	0.980411	0.863326	-
LOC607055	A0A8I3N228	Fibrinogen C-terminal domain-containing protein	30	9	11	9	9	75	98.2695	153.373	64.8217	83.8326	175.193	108.881	107.949	0.991443	0.983193	-
FARSA	A0A8I3NX27	Phenylalanine--tRNA ligase alpha subunit	33	13	14	13	13	197.7	163.835	167.338	165.238	171.194	175.061	176.291	170.497	0.967136	0.648721	-
RPL28	A0A8I3MCG8	Large ribosomal subunit protein eL28	46	9	12	9	9	186.3	229.085	577.758	168.504	165.972	175.061	331.047	169.845	0.513054	0.323141	-
RPL8	A0A8I3RWX4	Large ribosomal subunit protein uL2	45	12	16	12	12	653	219.132	335.432	99.1102	137.322	175.061	402.521	137.164	0.340763	0.174155	-
CTBP2	A0A8I3PXH8	C-terminal binding protein 2	25	11	11	8	11	168.7	82.7865	109.084	74.4551	67.3202	175.061	120.19	105.612	0.878706	0.753566	-
LOC119876970	A0A8I3NBP8	STEAP4 metalloreductase	31	7	8	7	7	92.8	78.6788	92.7281	86.5377	63.2273	175.061	88.069	108.275	1.22944	0.614371	-
HCFC1	A0A8I3PQX7	Host cell factor C1	8	15	15	15	15	208.7	211.232	189.986	167.687	155.104	174.929	203.306	165.907	0.816045	0.0140489	-
AOX4	A0A8I3Q5J4	aldehyde oxidase	28	31	36	29	31	213.4	304.446	199.296	422.729	653.161	174.797	239.047	416.895	1.74399	0.325865	-
RABGGTB	A0A8I3MSX5	Geranylgeranyl transferase type-2 subunit beta	28	9	11	9	9	177.6	225.293	206.468	197.894	231.739	174.665	203.12	201.433	0.991692	0.941612	-
CDK5	A0A8I3N6H1	Cyclin dependent kinase 5	41	9	9	9	9	158.2	184.058	147.711	177.484	169.923	174.665	163.323	174.024	1.06552	0.427249	-
LOC480466	A0A8I3PT54	RRM domain-containing protein	15	4	5	4	4	176	156.252	164.57	192.669	144.661	174.665	165.607	170.665	1.03054	0.762806	-
MAP2K3	A0A8I3PSQ0	Mitogen-activated protein kinase kinase 3	24	8	9	5	8	284.6	78.9948	111.475	128.99	177.827	174.533	158.357	160.45	1.01322	0.977204	-
LOC111092171	A0A8I3PY66	Kazal-like domain-containing protein	64	10	28	2	10	140.8	862.465	321.088	221.569	377.388	174.401	441.451	257.786	0.583952	0.490321	-
ADH5	A0A8I3PVI9	S-(hydroxymethyl)glutathione dehydrogenase	55	14	36	12	14	251.4	275.534	217.54	240.999	233.151	174.269	248.158	216.14	0.870977	0.303499	-
ACTR10	A0A8I3NZT5	Actin related protein 10	40	14	20	14	14	178.7	253.731	196.78	226.468	205.771	174.005	209.737	202.081	0.963499	0.794702	-
GNA14	A0A8I3N7G1	G protein subunit alpha 14	35	11	13	8	11	149.9	111.383	167.967	180.26	164.702	174.005	143.083	172.989	1.20901	0.209585	-
ATP6V1D	A0A8I3MUZ6	V-type proton ATPase subunit D	42	11	18	11	11	277.6	253.415	245.597	168.83	161.879	174.005	258.871	168.238	0.649892	0.0058166	Down
IFT27	A0A8I3MXE2	Intraflagellar transport 27	17	2	2	2	2	51.1	61.2999	44.288	78.7003	80.8689	174.005	52.2293	111.192	2.12891	0.198871	-
LOC478277	A0A8I3S958	creatine kinase	55	19	43	18	19	334.2	221.975	294.541	312.515	334.343	173.873	283.572	273.577	0.964754	0.877083	-
EHD1	A0A8I3Q4C4	EH domain containing 1	27	14	17	11	14	109.5	174.104	159.034	128.827	174.157	173.741	147.546	158.909	1.07701	0.670108	-
UFL1	A0A8I3RW63	E3 UFM1-protein ligase 1	15	10	10	10	10	216.1	160.359	150.605	174.218	155.246	173.741	175.688	167.735	0.954733	0.740076	-
MTREX	A0A8I3S665	Mtr4 exosome RNA helicase	19	20	22	20	20	164.4	156.884	174.258	145.971	129.418	173.61	165.181	149.666	0.906077	0.35513	-
BRPF1	A0A8I3NMP5	Bromodomain and PHD finger containing 1	1	1	3	1	1	69	93.0558	90.4634	104.825	87.5021	173.61	84.1731	121.979	1.44914	0.284666	-
PSMB5	A0A8I3MNI0	Proteasome subunit beta	66	14	29	14	14	180.6	262.737	158.028	289.656	246.699	173.478	200.455	236.611	1.18037	0.480439	-
UQCRC1	A0A8I3QCC4	Ubiquinol-cytochrome c reductase core protein 1	47	17	31	16	17	507.6	161.939	543.283	242.469	222.566	173.478	404.274	212.837	0.526468	0.254229	-
LOC119868546	A0A8I3PCT0	PWWP domain containing 3B	2	1	1	1	1	33.1	62.8798	41.2684	57.4741	83.4092	173.478	45.7494	104.787	2.29046	0.230906	-
ECHDC3	A0A8I3MFI1	Enoyl-CoA hydratase domain containing 3	16	4	4	4	4	147.1	42.4992	114.998	84.9049	42.4808	173.214	101.532	100.2	0.986876	0.979827	-
RPL10	A0A8I3PXJ3	Ribosomal protein L10e/L16 domain-containing protein	46	11	16	11	11	190.4	180.898	209.236	177.157	164.137	172.95	193.511	171.415	0.885813	0.100744	-
COG7	A0A8I3MQW4	Conserved oligomeric Golgi complex subunit 7	21	15	16	15	15	211.8	149.774	156.644	150.87	116.858	172.686	172.739	146.804	0.849861	0.368174	-
TAC3	A0A8I3N7Z8	Tachykinin 3	2	2	2	2	2	104.3	138.241	142.049	122.459	97.8047	172.554	128.197	130.939	1.02139	0.919535	-
EXOC2	A0A8I3NPJ7	Exocyst complex component 2	30	23	24	23	23	202.2	251.993	214.394	217.977	179.379	172.158	222.863	189.838	0.851818	0.185376	-
DHX30	A0A8I3NK34	RNA helicase	8	6	6	6	6	157.5	143.297	162.935	165.891	138.733	172.158	154.577	158.928	1.02814	0.735799	-
ANKRD44	A0A8I3S9I9	Ankyrin repeat domain 44	17	14	14	12	14	187.6	208.704	194.641	179.933	145.649	172.026	196.982	165.869	0.842055	0.0752744	-
ATXN2L	A0A8I3RR22	Sm domain-containing protein	18	15	17	13	15	155.2	132.553	110.972	99.9266	77.0583	171.895	132.908	116.293	0.874988	0.635114	-
RPA2	A0A8I3NHN6	Replication protein A2	7	2	2	2	2	201.6	206.966	196.402	216.018	222.425	171.631	201.656	203.358	1.00844	0.925627	-
CRAT	A0A8I3PPI0	Carnitine O-acetyltransferase	23	14	16	14	14	208.5	124.496	196.025	180.75	155.528	171.631	176.34	169.303	0.960091	0.817	-
IFT88	A0A8I3PLJ9	Intraflagellar transport 88	3	2	2	2	2	32.2	25.5943	72.3455	28.0839	43.3276	171.631	43.3799	81.0141	1.86755	0.501243	-
CDKN2AIP	A0A8I3P857	CDKN2A interacting protein	31	14	14	14	14	149.2	135.555	103.045	110.05	84.256	171.499	129.267	121.935	0.943281	0.818222	-
DNAAF5	A0A8I3RVE3	Dynein axonemal assembly factor 5	10	8	10	8	8	52.3	33.0198	41.3942	41.7994	41.6341	171.103	42.238	84.8455	2.00875	0.427648	-
LOC102152879	A0A8I3NZL6	Proteasome subunit alpha type-1	17	6	15	6	6	253.3	253.099	253.146	257.001	195.186	170.971	253.182	207.719	0.820435	0.217892	-
EIF2B1	A0A8I3P3X9	Translation initiation factor eIF-2B subunit alpha	45	13	18	13	13	192	167.785	160.167	173.075	189.823	170.971	173.317	177.957	1.02677	0.706282	-
STAT6	A0A8I3RXB9	Signal transducer and activator of transcription	21	16	17	16	16	111	154.356	116.885	145.808	135.205	170.971	127.414	150.661	1.18246	0.252413	-
PSME4	A0A8I3N952	Proteasome activator subunit 4	13	19	19	19	19	132.2	120.546	121.289	98.7836	120.386	170.971	124.678	130.047	1.04306	0.826635	-
LUC7L2	A0A8I3S7Z2	LUC7-like 2 (S. cerevisiae)	8	3	3	2	3	71.3	41.8672	58.883	84.0885	64.4975	170.971	57.3501	106.519	1.85735	0.268868	-
G3BP1	A0A8I3RSH4	G3BP stress granule assembly factor 1	32	10	17	10	10	229.8	168.259	133.996	157.564	144.661	170.707	177.352	157.644	0.888877	0.559311	-
OLFM4	A0A8I3NEU6	Olfactomedin 4	21	8	14	8	8	69.6	62.7219	200.554	170.953	140.991	170.707	110.959	160.884	1.44994	0.381843	-
CCDC22	A0A8I3PJY4	Coiled-coil domain-containing protein 22	28	17	18	17	17	173.5	154.514	127.706	143.522	115.729	170.707	151.906	143.319	0.943471	0.700126	-
RAB9A	P24408	Ras-related protein Rab-9A	7	1	1	1	1	92.6	103.167	83.1659	74.9449	74.5179	170.707	92.9777	106.723	1.14784	0.711313	-
ALDH3B2	A0A8I3NA38	Aldehyde dehydrogenase	15	6	7	5	6	205.6	144.876	192.879	185.158	196.456	170.575	181.119	184.063	1.01626	0.893194	-
MANF	A0A8I3P5H2	Mesencephalic astrocyte derived neurotrophic factor	34	8	10	8	8	110.6	91.6339	103.8	124.908	108.531	170.575	102.011	134.671	1.32016	0.214805	-
C1S	A0A8I3PR28	Complement C1s	16	9	10	9	9	66.7	70.6213	174.636	80.3331	85.6674	170.443	103.986	112.148	1.07849	0.867617	-
CRNN	A0A8I3PMZ1	Uncharacterized protein	43	18	28	18	18	735.9	144.402	625.694	465.344	1156.58	170.311	501.999	597.412	1.19007	0.797834	-
NT5C3A	A0A8I3S7J8	5'-nucleotidase	54	19	23	19	19	182	177.422	175.391	179.77	180.508	170.311	178.271	176.863	0.992103	0.735172	-
HDHD2	A0A8I3MLR1	Haloacid dehalogenase like hydrolase domain containing 2	35	7	11	7	7	180.1	205.544	164.445	199.69	168.089	170.311	183.363	179.363	0.978187	0.812022	-
NARS1	A0A8I3MJF3	asparagine--tRNA ligase	38	21	32	21	21	269.8	238.406	234.399	236.428	236.961	169.916	247.535	214.435	0.86628	0.277417	-
WNK1	A0A8I3PX23	non-specific serine/threonine protein kinase	11	27	31	22	27	208.1	173.315	168.848	170.463	144.943	169.916	183.421	161.774	0.881982	0.231519	-
AP3M1	A0A8I3N784	AP-3 complex subunit mu-1	19	8	11	8	8	174.3	243.62	152.743	166.708	110.224	169.652	190.221	148.861	0.78257	0.292117	-
BPGM	A0A8I3N9R0	Phosphoglycerate mutase	23	6	7	6	6	29.8	53.4005	41.0168	43.7587	45.7269	169.652	41.4057	86.3792	2.08616	0.393247	-
AP3M2	A0A8I3N2X0	AP-3 complex subunit mu-2	2	1	1	1	1	189.8	279.957	143.307	206.874	106.414	169.52	204.355	160.936	0.787532	0.435724	-
MYO1E	A0A8I3NQ19	Myosin IE	19	20	22	20	20	161.5	255.153	148.214	247.531	239.361	169.388	188.289	218.76	1.16183	0.509734	-
UEVLD	A0A8I3P1P9	UEV and lactate/malate dehyrogenase domains	30	14	16	14	14	269.2	151.354	136.89	222.222	199.702	169.256	185.815	197.06	1.06052	0.8201	-
SMU1	A0A8I3S487	WD40 repeat-containing protein SMU1	20	10	10	10	10	157.8	152.776	143.684	151.686	150.871	169.256	151.42	157.271	1.03864	0.472068	-
MYBBP1A	A0A8I3MH33	MYB binding protein 1a	17	18	19	18	18	243	131.447	120.534	118.867	86.6553	169.124	164.994	124.882	0.75689	0.440855	-
FABP3	A0A8I3N3X1	Uncharacterized protein	50	8	12	7	8	273.2	283.117	149.85	211.283	229.905	168.86	235.389	203.349	0.863886	0.545648	-
CPOX	A0A8I3NZM6	coproporphyrinogen oxidase	39	15	19	15	15	292.9	167.785	262.583	181.403	175.569	168.86	241.089	175.277	0.727022	0.221983	-
HECTD1	A0A8I3NJ06	E3 ubiquitin-protein ligase	11	23	25	22	23	200	169.997	180.172	175.035	188.976	168.597	183.39	177.536	0.968081	0.615982	-
MAP4K1	A0A8I3RTV7	Uncharacterized protein	36	12	17	12	12	181.6	110.119	270.258	168.993	163.714	168.597	187.325	167.101	0.892037	0.705063	-
VPS29	A0A8I3S6P0	Vacuolar protein sorting-associated protein 29	36	7	14	7	7	167.3	147.562	159.538	162.136	122.785	168.597	158.133	151.172	0.955981	0.68638	-
PRKAG3	A0A8I3PWP1	Protein kinase AMP-activated non-catalytic subunit gamma 3	2	1	1	1	1	126.3	159.727	129.844	197.567	236.114	168.465	138.624	200.715	1.44791	0.0665782	-
CAB39L	A0A8I3PQG2	Calcium binding protein 39 like	52	21	27	17	21	184	199.067	122.044	229.243	157.221	168.465	168.37	184.976	1.09863	0.636299	-
PTPN11	A0A8I3PMT9	Tyrosine-protein phosphatase non-receptor type	34	19	22	18	19	131.3	182.478	155.511	200.996	190.246	168.201	156.43	186.481	1.19211	0.175363	-
IFI44L	A0A8I3MKR1	Uncharacterized protein	32	20	22	18	20	375.4	225.925	161.551	192.669	130.971	168.201	254.292	163.947	0.644719	0.287607	-
HTATIP2	A0A8I3PGF9	HIV-1 Tat interactive protein 2	33	10	13	10	10	201.2	181.214	196.025	204.915	196.315	168.069	192.813	189.766	0.984199	0.824712	-
MYOF	A0A8I3PC83	Myoferlin	13	21	21	21	21	179.9	156.094	168.219	233.162	157.786	168.069	168.071	186.339	1.10869	0.524892	-
CCDC25	A0A8I3NEF3	Coiled-coil domain-containing protein 25	24	7	9	7	7	182.1	203.333	165.074	222.549	135.346	167.805	183.502	175.233	0.954939	0.786923	-
DRG1	A0A8I3PCX9	Developmentally regulated GTP binding protein 1	36	11	12	11	11	129.8	90.844	88.7019	156.258	118.833	167.805	103.115	147.632	1.43172	0.0898347	-
HBM	A0A8I3MHE1	Hemoglobin subunit mu	23	3	3	3	3	16.6	16.9049	24.1571	26.4512	31.0491	167.805	19.2207	75.1018	3.90734	0.351352	-
UGT8	A0A8I3QHY8	UDP glycosyltransferase 8	3	2	2	2	2	65.8	35.5476	26.6735	132.746	98.6515	167.277	42.6737	132.891	3.11413	0.025449	UP
ACADL	A0A8I3NWW7	Long-chain specific acyl-CoA dehydrogenase, mitochondrial	28	10	11	10	10	96.8	98.1115	148.088	120.173	149.459	167.013	114.333	145.549	1.27302	0.226949	-
MCAT	A0A8I3NTU8	Malonyl-CoA-acyl carrier protein transacylase	15	6	6	6	6	125.6	62.8798	110.972	72.4958	68.4492	166.75	99.8172	102.565	1.02753	0.94557	-
IDI1	A0A8I3MK52	isopentenyl-diphosphate Delta-isomerase	67	9	10	9	9	228.7	221.501	257.928	277.9	355.089	166.618	236.043	266.536	1.12918	0.635989	-
CMBL	A0A8I3P8N1	Carboxymethylenebutenolidase homolog	10	3	3	3	3	105.7	218.342	208.355	73.1489	114.176	166.486	177.466	117.937	0.664562	0.261563	-
USP8	A0A8I3PNU1	Ubiquitin specific peptidase 8	18	18	20	18	18	172.8	197.329	144.565	155.931	146.637	166.09	171.565	156.219	0.910556	0.42599	-
STX5	A0A8I3N2I9	Syntaxin 5	4	2	2	2	2	170.7	203.807	183.946	175.688	173.593	165.958	186.151	171.746	0.922618	0.269859	-
CADM1	A0A8I3MMZ2	Cell adhesion molecule 1	14	4	4	4	4	114.6	90.37	65.4255	54.3718	27.9442	165.562	90.1318	82.6261	0.916725	0.878971	-
PPP2R2B	A0A8I3PIK7	Serine/threonine-protein phosphatase 2A 55 kDa regulatory subunit B	9	4	6	1	4	207	261.157	207.349	349.743	366.38	165.298	225.168	293.807	1.30483	0.400141	-
UBA2	A0A8I3MRU4	SUMO-activating enzyme subunit 2	50	22	28	22	22	194.4	197.961	171.49	178.137	173.734	165.298	187.95	172.39	0.917209	0.192913	-
BCAM	A0A8I3MZ66	Basal cell adhesion molecule (Lutheran blood group)	9	4	4	4	4	91.5	106.169	90.4634	120.826	103.732	165.298	96.0441	129.952	1.35305	0.199942	-
CKMT2	A0A8I3PNS0	creatine kinase	6	2	5	2	2	348.6	165.257	202.693	261.083	260.248	165.035	238.85	228.788	0.957875	0.885213	-
PRKCSH	A0A8I3P6Y9	Protein kinase C substrate 80K-H	23	12	16	12	12	173.5	108.223	170.358	162.789	161.738	165.035	150.694	163.187	1.08291	0.616321	-
DNASE1	Q767J3	Deoxyribonuclease-1	45	9	21	9	9	183.5	654.709	607.577	415.381	430.877	164.903	481.928	337.054	0.699385	0.460071	-
MVD	A0A8I3MRB6	Diphosphomevalonate decarboxylase	14	5	5	5	5	179.4	198.277	220.434	198.22	293.555	164.903	199.37	218.893	1.09792	0.669382	-
C1QC	A0A8I3MBH0	Complement C1q C chain	26	5	6	5	5	59.3	129.077	94.9928	179.117	134.923	164.903	94.4568	159.647	1.69016	0.0629137	-
LTN1	A0A8I3P664	E3 ubiquitin-protein ligase listerin	11	18	19	18	18	145.1	163.835	120.66	154.135	146.778	164.639	143.198	155.184	1.0837	0.448286	-
NUP205	A0A8I3NAH9	Nucleoporin 205	10	17	19	17	17	222.1	193.695	159.538	213.569	174.299	164.507	191.778	184.125	0.960095	0.761451	-
CPNE8	A0A8I3QZ57	Copine 8	2	1	1	1	1	120.1	130.973	106.191	186.301	164.419	164.375	119.088	171.698	1.44178	0.00679503	-
CPNE5	A0A8I3RXB0	Copine 5	2	1	1	1	1	120.1	130.973	106.191	186.301	164.419	164.375	119.088	171.698	1.44178	0.00679503	-
CPNE7	A0A8I3MMK8	Copine 7	2	1	1	1	1	120.1	130.973	106.191	186.301	164.419	164.375	119.088	171.698	1.44178	0.00679503	-
CPNE4	A0A8I3PZN1	Copine 4	2	1	1	1	1	120.1	130.973	106.191	186.301	164.419	164.375	119.088	171.698	1.44178	0.00679503	-
CPNE2	A0A8I3MMA0	Copine 2	2	1	1	1	1	120.1	130.973	106.191	186.301	164.419	164.375	119.088	171.698	1.44178	0.00679503	-
UBLCP1	A0A8I3MIL5	Ubiquitin-like domain-containing CTD phosphatase 1	44	12	16	12	12	103.8	137.925	117.892	119.03	114.882	164.375	119.872	132.762	1.10753	0.535094	-
GBF1	A0A8I3PN68	Golgi brefeldin A resistant guanine nucleotide exchange factor 1	18	26	27	26	26	152.7	140.927	144.188	115.601	126.172	164.243	145.938	135.339	0.927372	0.550879	-
PROS1	A0A8I3Q4I1	Protein S	29	16	18	16	16	69.2	94.9517	130.599	86.5377	114.176	164.243	98.2504	121.652	1.23819	0.46565	-
CHID1	A0A8I3NGB9	Chitinase domain containing 1	23	7	8	7	7	143.9	82.9445	119.15	94.0485	92.3006	164.243	115.331	116.864	1.01329	0.961347	-
RPL17	A0A8I3NZS5	Large ribosomal subunit protein uL22	42	10	16	5	10	397	257.207	390.037	135.521	207.465	164.111	348.081	169.032	0.485612	0.04153	Down
LOC106559787	A0A8I3NAG9	Large ribosomal subunit protein uL22	45	10	16	5	10	397	257.207	390.037	135.521	207.465	164.111	348.081	169.032	0.485612	0.04153	Down
LOC106559613	A0A8I3NS62	Large ribosomal subunit protein uL22	39	8	14	5	8	397	257.207	390.037	135.521	207.465	164.111	348.081	169.032	0.485612	0.04153	Down
ACAP2	A0A8I3S7T4	Arf-GAP with coiled-coil, ANK repeat and PH domain-containing protein	30	20	21	20	20	186	225.925	204.958	198.873	190.246	164.111	205.628	184.41	0.896817	0.245076	-
CYFIP2	A0A8I3RQH6	Cytoplasmic FMR1-interacting protein	10	13	13	13	13	124.2	185.164	124.686	132.909	123.632	164.111	144.683	140.217	0.969133	0.861312	-
MOCS1	A0A8I3NK78	cyclic pyranopterin monophosphate synthase	21	10	12	10	10	117.1	96.5316	134.122	124.908	103.027	163.979	115.918	130.638	1.12699	0.527247	-
LOC490690	A0A8I3MMN3	L-lactate dehydrogenase	23	9	61	1	9	265.6	322.457	229.493	290.473	248.534	163.715	272.516	234.241	0.859547	0.456939	-
KIAA1217	A0A8I3RUG2	KIAA1217	10	16	16	16	16	157.4	139.979	127.957	196.098	122.221	163.452	141.779	160.59	1.13268	0.481411	-
IDH3B	A0A8I3S238	Isocitrate dehydrogenase [NAD] subunit, mitochondrial	21	7	7	7	7	124.4	53.8744	94.4895	87.6807	70.4251	163.452	90.9213	107.186	1.17888	0.669791	-
TRIP11	A0A8I3P688	Thyroid hormone receptor interactor 11	12	22	23	22	22	242.6	167.943	158.909	148.257	142.544	163.32	189.817	151.373	0.79747	0.282031	-
SMYD4	A0A8I3NFG5	SET and MYND domain containing 4	9	6	6	6	6	108.8	107.591	109.714	127.357	93.1474	163.32	108.701	127.941	1.177	0.442523	-
PIN4	A0A8I3P611	Peptidyl-prolyl cis-trans isomerase	30	4	4	4	4	74.2	36.9696	37.368	129.643	97.9459	163.188	49.5125	130.259	2.63083	0.029524	UP
LOC479087	A0A8I3MM73	60S ribosomal protein L32-like	13	2	5	2	2	113.2	118.808	100.151	136.011	168.653	163.056	110.72	155.907	1.40812	0.027548	-
RPL32	E2RKA8	Large ribosomal subunit protein eL32	45	7	12	7	7	113.2	118.808	100.151	60.4131	74.5179	163.056	110.72	99.3289	0.89712	0.758442	-
FIBP	A0A8I3NXY5	FGF1 intracellular binding protein	18	6	7	6	6	60.3	68.2515	56.4924	67.4341	51.3722	163.056	61.6813	93.954	1.52322	0.452562	-
SDHB	A0A8I3MX02	Succinate dehydrogenase [ubiquinone] iron-sulfur subunit, mitochondrial	42	13	14	13	13	199.1	95.5837	280.575	188.75	169.359	162.924	191.753	173.678	0.905737	0.768893	-
PRDX3	A0A8I3NPL3	Peroxiredoxin 3	31	7	14	7	7	153.1	119.282	239.306	147.441	167.524	162.924	170.563	159.296	0.933945	0.783887	-
SEC24A	A0A8I3NZW8	SEC24 homolog A, COPII coat complex component	14	12	13	11	12	135.5	151.196	149.975	121.153	107.966	162.924	145.557	130.681	0.897799	0.468394	-
CAPZA2	A0M8V0	F-actin-capping protein subunit alpha-2	72	13	23	10	13	174.3	193.063	174.887	197.077	186.295	162.792	180.75	182.055	1.00722	0.918687	-
LRPAP1	A0A8I3N6H6	LDL receptor related protein associated protein 1	38	13	13	13	13	156.9	84.9984	133.367	141.563	183.19	162.792	125.089	162.515	1.2992	0.216978	-
HNRNPDL	A0A8I3NY09	Heterogeneous nuclear ribonucleoprotein D like	27	12	19	10	12	178.5	73.3071	62.9091	132.092	75.0824	162.792	104.905	123.322	1.17556	0.705584	-
SNRPB2	A0A8I3PEQ1	Small nuclear ribonucleoprotein polypeptide B2	31	7	8	5	7	145.3	94.6357	81.027	104.662	103.873	162.66	106.988	123.732	1.15651	0.576707	-
LOC100682736	A0A8I3NFP6	Uncharacterized protein	18	4	5	4	4	110.2	129.709	99.6481	115.111	128.148	162.528	113.186	135.263	1.19505	0.268305	-
BLVRA	A0A8I3NLZ5	Biliverdin reductase A	29	7	12	7	7	104.5	119.44	93.483	84.5784	122.926	162.528	105.808	123.344	1.16574	0.524409	-
RPS20	J9P9Z7	Small ribosomal subunit protein uS10	36	5	15	5	5	115	182.794	114.495	101.07	111.071	162.396	137.43	124.846	0.908434	0.69312	-
SERPINF1	A0A8I3S0B7	Serpin family F member 1	17	7	10	7	7	90.5	118.966	218.924	137.807	127.584	162.264	142.797	142.552	0.998285	0.995639	-
DSG3	Q7YRU7	Desmoglein-3	26	22	35	21	22	265.1	275.534	404.38	351.213	588.804	162.132	315.005	367.383	1.16628	0.721336	-
CBFB	A0A8I3NAM5	Core-binding factor subunit beta	11	3	3	3	3	199.3	192.905	151.863	165.565	120.95	162.132	181.356	149.549	0.824617	0.198386	-
UCHL3	A0A8I3PSJ9	Ubiquitin carboxyl-terminal hydrolase	63	13	19	13	13	139.7	176.948	194.138	205.731	219.602	162	170.262	195.778	1.14986	0.341712	-
GBP6	A0A8I3S2V3	GB1/RHD3-type G domain-containing protein	25	12	13	12	12	174	160.833	251.762	149.563	159.338	162	195.532	156.967	0.802771	0.306327	-
KIF3A	A0A8I3NH94	Kinesin-like protein	17	13	13	13	13	103.6	110.435	101.535	94.0485	76.2115	161.868	105.19	110.71	1.05247	0.852471	-
TIMM8A	A0A8I3PDW9	Mitochondrial import inner membrane translocase subunit	30	3	3	3	3	265	133.343	169.603	156.584	157.645	161.737	189.315	158.655	0.838047	0.516693	-
CSNK1E	A0A8I3S8K9	Transmembrane protein 184B	6	2	2	2	2	133.2	190.377	164.193	259.45	155.669	161.737	162.59	192.285	1.18264	0.487524	-
CSNK1D	A0A8I3MZY0	Casein kinase 1 delta	5	2	2	2	2	133.2	190.377	164.193	259.45	155.669	161.737	162.59	192.285	1.18264	0.487524	-
COMT	Q60F99	Catechol O-methyltransferase	50	8	11	8	8	270.9	109.329	179.039	186.464	128.43	161.737	186.423	158.877	0.852241	0.625041	-
SMARCE1	A0A8I3N953	SWI/SNF related, matrix associated, actin dependent regulator of chromatin, subfamily e, member 1	11	4	4	4	4	172.5	134.449	124.308	89.4767	71.9775	161.605	143.753	107.686	0.749109	0.328723	-
PSMD4	A0A8I3PB85	26S proteasome non-ATPase regulatory subunit 4	35	12	21	12	12	251.4	204.912	277.429	191.526	225.812	161.473	244.581	192.937	0.788848	0.142254	-
RBPMS2	A0A8I3S3S2	RNA binding protein, mRNA processing factor 2	4	1	1	1	1	152	130.815	210.871	142.216	178.391	161.341	164.562	160.649	0.976222	0.891308	-
NUCB1	A0A8I3RP80	Nucleobindin 1	47	20	30	19	20	288.6	200.015	341.471	197.241	236.82	161.209	276.695	198.423	0.717118	0.191075	-
PTGR2	A0A8I3NQ20	Prostaglandin reductase 2	50	12	21	12	12	191.5	232.877	223.831	186.628	176.415	161.209	216.069	174.751	0.808772	0.0602911	-
PLXNB2	A0A8I3MSI1	Plexin B2	7	12	14	12	12	168	139.189	146.452	196.588	128.43	161.209	151.214	162.076	1.07183	0.651121	-
PDHX	A0A8I3S3H9	Dihydrolipoamide acetyltransferase component of pyruvate dehydrogenase complex	13	6	7	6	6	126.8	110.909	143.684	128.664	124.62	161.077	127.131	138.12	1.08644	0.503785	-
LOC102152612	A0A8I3MY97	Prefoldin subunit 1	61	8	11	8	8	167.4	199.067	173.881	161.156	202.384	160.945	180.116	174.828	0.970643	0.770763	-
ZFR	A0A8I3RQ79	Uncharacterized protein	10	8	9	8	8	132.1	111.067	107.449	139.113	119.116	160.945	116.872	139.725	1.19554	0.198211	-
ALDOC	A0A8I3NII5	Fructose-bisphosphate aldolase	49	17	57	11	17	141.2	136.819	151.611	159.85	203.09	160.813	143.21	174.584	1.21908	0.149627	-
ISG15	A0A8I3P342	ISG15 ubiquitin like modifier	77	10	22	10	10	400.9	238.09	280.197	170.953	148.189	160.813	306.396	159.985	0.522151	0.0928555	-
PDLIM4	A0A8I3NDV0	PDZ and LIM domain 4	45	12	15	12	12	227.7	168.417	137.394	153.645	122.221	160.813	177.837	145.56	0.818501	0.35319	-
SEC14L2	A0A8I3S198	SEC14 like lipid binding 2	26	8	27	7	8	72.6	96.8476	53.4728	82.1292	72.9654	160.813	74.3068	105.303	1.41713	0.390693	-
LOC475521	A0A8I3P0A5	Uncharacterized protein	4	1	15	1	1	110.8	211.706	155.386	247.367	206.477	160.549	159.297	204.798	1.28563	0.303955	-
PRSS1	P06871	Serine protease 1	4	1	15	1	1	110.8	211.706	155.386	247.367	206.477	160.549	159.297	204.798	1.28563	0.303955	-
KIF2A	A0A8I3NL14	Kinesin-like protein	18	13	14	13	13	107.5	90.528	83.1659	141.726	113.188	160.549	93.7313	138.488	1.4775	0.0630338	-
TIAL1	A0A8I3P8I8	TIA1 cytotoxic granule associated RNA binding protein like 1	37	6	6	5	6	139.2	58.4561	89.4568	73.4754	86.5142	160.549	95.7043	106.846	1.11642	0.772029	-
UBE2R2	A0A8I3PHW5	Uncharacterized protein	18	4	4	3	4	150.4	215.024	286.866	176.341	184.742	160.285	217.43	173.79	0.79929	0.383684	-
ARPC5	A0A8I3MNR2	Actin-related protein 2/3 complex subunit 5	57	7	15	7	7	186.3	297.968	216.785	200.18	287.204	160.153	233.684	215.846	0.923664	0.740364	-
RAB8B	A0A8I3PCQ0	RAB8B, member RAS oncogene family	43	8	12	4	8	178.5	153.566	355.94	123.275	138.451	160.153	229.335	140.627	0.613192	0.297264	-
F12	A0A8I3NR05	Coagulation factor XII	8	4	4	4	4	86.5	93.8458	91.7215	143.032	98.087	160.022	90.6891	133.714	1.47442	0.143447	-
TXNDC9	A0A8I3P438	Thioredoxin domain containing 9	15	4	5	4	4	184.7	116.596	141.042	115.438	91.8772	160.022	147.446	122.446	0.830443	0.425615	-
COG2	A0A8I3RR94	Conserved oligomeric Golgi complex subunit 2	28	14	16	14	14	170.7	182.004	150.101	120.173	118.692	159.758	167.602	132.874	0.792799	0.109632	-
PNPO	A0A8I3RZ18	pyridoxal 5'-phosphate synthase	28	5	6	5	5	166	130.341	112.985	115.928	115.023	159.758	136.442	130.236	0.954516	0.787061	-
SYNE1	A0A8I3MUK8	Spectrin repeat containing nuclear envelope protein 1	4	34	34	33	34	217.3	177.896	184.575	222.549	187	159.626	193.257	189.725	0.981723	0.880816	-
AIF1	A0A8I3NIF7	Allograft inflammatory factor 1	48	6	6	6	6	193.9	346.313	126.573	118.54	101.333	159.626	222.262	126.5	0.569147	0.275909	-
PSMD7	A0A8I3N9G3	Uncharacterized protein	46	12	28	12	12	195.9	220.079	220.685	231.366	218.05	159.494	212.222	202.97	0.956405	0.724902	-
COX7A2	Q9TR29	Cytochrome c oxidase subunit 7A2, mitochondrial (Fragment)	28	1	1	1	1	421.1	202.385	480.248	269.573	220.731	159.362	367.911	216.555	0.588608	0.207853	-
AMPD3	A0A8I3NUX4	AMP deaminase	14	10	12	9	10	159.5	262.579	181.682	219.447	226.094	159.23	201.253	201.59	1.00167	0.993383	-
NEB	A0A8I3N6H5	Nebulin	0	1	2	1	1	168.5	293.387	135.129	202.139	181.496	159.23	199.005	180.955	0.909299	0.747781	-
DHRS7	A0A8I3S5F7	Dehydrogenase/reductase 7	34	10	14	10	10	264.8	139.663	225.718	157.891	153.411	159.23	210.06	156.844	0.746661	0.286468	-
SRP9	P21262	Signal recognition particle 9 kDa protein	42	4	4	4	4	106.3	79.4687	133.619	134.542	133.229	159.23	106.463	142.334	1.33693	0.134553	-
CUL2	A0A8I3RRY3	Cullin 2	31	21	23	21	21	133.5	169.049	136.639	125.398	107.825	159.23	146.396	130.818	0.893589	0.45908	-
CSTF3	A0A8I3PSH2	Cleavage stimulation factor subunit 3	8	6	6	6	6	158.9	154.83	134.751	115.601	85.8085	158.966	149.494	120.125	0.803548	0.299677	-
WDR77	A0A8I3MI84	WD repeat domain 77	27	8	10	8	8	140.1	110.277	114.495	98.9469	116.011	158.834	121.624	124.597	1.02445	0.891739	-
TXNDC17	A0A8I3N199	Thioredoxin domain containing 17	54	6	13	6	6	173.7	227.663	175.768	133.235	151.294	158.702	192.377	147.744	0.767991	0.112043	-
PKN2	A0A8I3NX96	protein kinase C	16	13	13	12	13	173.3	160.991	111.098	141.563	99.9217	158.702	148.463	133.396	0.898511	0.590951	-
NBN	A0A8I3PAJ3	Nibrin	4	3	3	3	3	102.2	103.483	126.573	201.159	170.911	158.57	110.752	176.88	1.59708	0.0167984	UP
CUL4A	A0A8I3PXH4	Cullin 4A	37	26	31	12	26	198.1	147.246	147.962	157.074	166.96	158.439	164.436	160.824	0.978033	0.851297	-
NUDT5	A0A8I3MUV7	Nudix hydrolase 5	47	11	17	11	11	231.5	227.031	287.495	252.919	240.49	158.307	248.675	217.238	0.873582	0.433121	-
FBXW9	A0A8I3P0Y2	F-box and WD repeat domain containing 9	12	5	6	5	5	59.2	83.4185	67.3128	59.4335	75.3647	158.307	69.9771	97.7016	1.39619	0.463312	-
LOC100686132	A0A8I3S252	peptidylprolyl isomerase	10	2	4	2	2	157.6	132.395	68.4452	193.975	219.743	157.911	119.48	190.543	1.59477	0.100106	-
ATXN2	A0A8I3S7E4	Ataxin 2	4	6	8	4	6	126.8	80.2587	94.9928	92.7423	85.8085	157.911	100.684	112.154	1.11392	0.694882	-
CRELD2	A0A8I3N9G7	protein disulfide-isomerase	8	3	3	3	3	198.4	114.858	146.075	153.809	172.746	157.779	153.111	161.444	1.05443	0.768123	-
DRG2	A0A8I3PMN7	Developmentally regulated GTP binding protein 2	42	14	17	14	14	168	193.063	126.196	172.586	125.043	157.779	162.42	151.803	0.934632	0.683673	-
C6	A0A8I3MKJ7	Complement component C6	13	12	12	12	12	92.5	95.4257	117.137	146.461	122.221	157.779	101.688	142.154	1.39794	0.0404156	-
PPP6R3	A0A8I3N290	Protein phosphatase 6 regulatory subunit 3	25	20	23	20	20	168.8	188.482	130.222	133.889	150.024	157.647	162.501	147.186	0.905756	0.475399	-
PRKAR1B	A0A8I3NCW7	Protein kinase cAMP-dependent type I regulatory subunit beta	5	3	3	3	3	86.7	84.8404	87.4437	76.741	114.176	157.647	86.328	116.188	1.34589	0.32969	-
SCRN3	A0A8I3P2I7	Secernin 3	26	10	10	10	10	151.6	131.763	145.194	120.5	78.1873	157.647	142.853	118.778	0.831473	0.40576	-
IFT74	A0A8I3S2R4	Intraflagellar transport 74	9	6	6	6	6	37.5	34.5997	44.6655	49.6367	41.9163	157.647	38.9217	83.0667	2.1342	0.358691	-
RAD23A	A0A8I3NT37	UV excision repair protein RAD23	43	11	14	9	11	152.6	135.713	128.586	130.296	140.568	157.515	138.966	142.793	1.02754	0.738006	-
PGP	A0A8I3N986	Phosphoglycolate phosphatase	60	15	17	15	15	152.5	107.433	127.328	78.0472	75.5058	157.515	129.087	103.689	0.803252	0.460419	-
MPDU1	A0A8I3PT73	Mannose-P-dolichol utilization defect 1 protein	4	1	1	1	1	180.8	44.869	69.5775	88.0072	69.8605	157.515	98.4155	105.128	1.0682	0.9	-
HYAL1	A0A8I3PI48	Hyaluronidase	6	4	4	4	4	23	74.2551	69.8292	54.8616	46.4326	157.515	55.6947	86.2698	1.54897	0.496732	-
FBXO2	A0A8I3MKY5	F-box protein 2	15	3	3	3	3	24.2	35.8636	20.3826	37.3908	28.6499	157.515	26.8154	74.5186	2.77895	0.369853	-
MACROH2A1	A0A8I3P187	Histone H2A	38	6	12	6	6	169.3	286.119	286.866	230.55	200.549	157.383	247.428	196.161	0.792798	0.330301	-
FHL1	A0A8I3PVE3	Four and a half LIM domains 1	38	9	9	9	9	189.2	212.022	88.0728	142.869	133.37	157.383	163.098	144.541	0.886219	0.676401	-
PAPOLA	A0A8I3MTX2	Poly(A) polymerase	27	15	18	15	15	134.5	169.049	125.441	143.195	119.821	157.383	142.997	140.133	0.979977	0.876268	-
FAM136A	A0A8I3S6G4	Protein FAM136A	36	5	5	5	5	289.5	107.749	115.753	145.155	102.886	157.383	171.001	135.141	0.790296	0.612065	-
PLA2G7	Q28262	Platelet-activating factor acetylhydrolase	61	25	35	25	25	236.1	653.445	979.37	361.826	383.033	157.251	622.971	300.703	0.482692	0.26965	-
GCSH	A0A8I3PC34	Glycine cleavage system H protein	12	2	3	2	2	200.9	66.8296	137.897	80.6597	93.9942	157.251	135.209	110.635	0.818253	0.622401	-
STRBP	A0A8I3RYZ1	Spermatid perinuclear RNA binding protein	13	9	11	5	9	102.9	72.3592	76.4975	91.5994	68.8726	157.119	83.9189	105.864	1.2615	0.50208	-
FSCN1	A0A8I3NPK1	Fascin	19	9	9	9	9	57	88.4741	49.6982	62.5357	65.9088	157.119	65.0575	95.188	1.46314	0.440666	-
PARP3	A0A8I3P5K1	Poly(ADP-ribose) polymerase family member 3	29	12	14	12	12	89.2	106.643	132.361	114.295	106.837	156.987	109.401	126.04	1.15209	0.454908	-
OGT	A0A8I3P4Y7	UDP-N-acetylglucosamine--peptide N-acetylglucosaminyltransferase 110 kDa subunit	17	14	14	14	14	110.4	114.068	96.251	110.213	63.7918	156.987	106.906	110.331	1.03203	0.911352	-
NFIB	A0A8I3N7A5	Nuclear factor 1	3	1	1	1	1	63.2	35.2317	52.3404	48.3305	42.0575	156.855	50.2574	82.4145	1.63985	0.481204	-
GDPD3	A0A8I3RRU9	Glycerophosphodiester phosphodiesterase domain containing 3	36	11	15	11	11	242.4	196.855	212.381	223.855	136.616	156.724	217.212	172.398	0.793686	0.227958	-
CALCOCO2	A0A8I3NGB8	Calcium binding and coiled-coil domain 2	20	11	11	11	11	194.8	193.379	160.167	177.974	175.145	156.592	182.782	169.904	0.929542	0.394642	-
NT5C3B	A0A8I3NFE3	5'-nucleotidase	33	12	18	12	12	143.6	162.729	145.194	160.993	145.366	156.592	150.508	154.317	1.02531	0.648272	-
NOP56	A0A8I3P2E5	NOP56 ribonucleoprotein	8	5	5	5	5	155.3	90.686	89.2052	105.315	96.2523	156.592	111.73	119.386	1.06852	0.803577	-
DES	Q5XFN2	Desmin	7	5	12	2	5	372.5	180.74	271.516	386.807	387.973	156.46	274.919	310.413	1.12911	0.728991	-
LOC119867725	A0A8I3P1U7	GTP-binding nuclear protein Ran	20	4	11	4	4	281.5	389.444	250.504	226.304	157.221	156.46	307.149	179.995	0.586018	0.0744336	-
STXBP3	A0A8I3N4I4	Syntaxin binding protein 3	12	8	8	8	8	173.3	137.767	95.4961	168.83	131.818	156.46	135.521	152.369	1.12432	0.550079	-
ARHGDIB	A0A8I3P6H9	Rho GDP dissociation inhibitor beta	61	10	23	10	10	167.9	230.665	184.953	203.772	221.578	156.328	194.506	193.892	0.996846	0.98298	-
CSNK2A1	A0A8I3P1T3	Uncharacterized protein	54	15	25	15	15	196.2	315.979	271.264	223.039	202.948	156.328	261.148	194.105	0.743276	0.18887	-
MIA3	A0A8I3S7L2	MIA SH3 domain ER export factor 3	7	13	13	12	13	248	161.307	193.005	171.606	162.585	156.328	200.771	163.506	0.814391	0.277443	-
LYPLA2	A0A8I3NS67	palmitoyl-protein hydrolase	42	9	32	9	9	216.1	212.338	216.911	225.488	248.111	156.064	215.116	209.888	0.975694	0.867753	-
KIF1A	A0A8I3QZC2	Kinesin family member 1A	4	7	8	2	7	98.4	246.148	237.293	232.019	216.356	156.064	193.947	201.48	1.03884	0.896603	-
LOC476784	A0A8I3NBQ0	Uncharacterized protein	18	4	8	4	4	175.1	150.564	138.4	168.83	165.548	156.064	154.688	163.481	1.05684	0.508644	-
APIP	A0A8I3PM34	Methylthioribulose-1-phosphate dehydratase	28	7	12	2	7	129.5	156.252	134.374	144.828	181.214	155.932	140.042	160.658	1.14721	0.20756	-
SAFB	A0A8I3NRT7	Scaffold attachment factor B	16	14	15	8	14	229.7	87.5262	98.2641	100.416	105.99	155.932	138.497	120.78	0.872075	0.745155	-
TBC1D2	A0A8I3N0M0	TBC1 domain family member 2	21	19	21	19	19	164.6	199.857	150.856	194.955	203.372	155.8	171.771	184.709	1.07532	0.565536	-
EXOC4	A0A8I3NZH6	Exocyst complex component Sec8	29	25	27	25	25	227.2	179.002	177.655	201.649	164.419	155.8	194.619	173.956	0.893828	0.39257	-
KIF21A	A0A8I3Q7J3	Kinesin family member 21A	13	20	21	20	20	241.4	191.641	216.282	173.075	161.879	155.8	216.441	163.585	0.755794	0.0536704	-
SUMO3	A0A8I3S2C8	Small ubiquitin-related modifier	24	3	7	2	3	155.2	143.297	128.586	129.807	119.539	155.8	142.361	135.049	0.948635	0.613458	-
YWHAG	A0A8I3MT06	Tyrosine 3-monooxygenase/tryptophan 5-monooxygenase activation protein gamma	59	16	72	9	16	203.9	288.331	217.917	242.795	241.619	155.668	236.716	213.361	0.901336	0.581071	-
ALYREF	A0A8I3N0B0	Aly/REF export factor	27	4	7	4	4	175.5	41.7092	51.963	73.802	58.5699	155.536	89.7241	95.9694	1.06961	0.911649	-
USP4	A0A8I3PWL6	Ubiquitin carboxyl-terminal hydrolase	24	21	25	19	21	209	200.647	187.092	179.607	181.214	155.404	198.913	172.075	0.865077	0.067257	-
M6PR	A0A8I3QHA2	Mannose-6-phosphate receptor, cation dependent	25	9	12	9	9	276.5	139.189	165.199	179.28	155.528	155.404	193.629	163.404	0.843901	0.549422	-
SNX9	A0A8I3MGT0	Sorting nexin	16	11	14	11	11	116.9	148.826	134.248	155.768	125.89	155.14	133.325	145.599	1.09207	0.414922	-
GBE1	A0A8I3P9W3	1,4-alpha-glucan branching enzyme	32	20	28	20	20	173.1	148.51	153.624	138.46	150.306	155.009	158.411	147.925	0.933802	0.316372	-
CDHR4	A0A8I3Q3R3	Ubiquitin like modifier activating enzyme 7	30	24	35	24	24	165.5	131.289	131.103	148.747	125.749	155.009	142.631	143.168	1.00377	0.972285	-
NPC2	A0A8I3NVN8	NPC intracellular cholesterol transporter 2	50	9	13	9	9	107.9	83.4185	80.9012	105.151	89.3368	155.009	90.7399	116.499	1.28388	0.325938	-
GPLD1	A0A8I3P2N1	Phosphatidylinositol-glycan-specific phospholipase D	14	9	9	9	9	49.4	71.2533	124.812	96.8243	69.4371	155.009	81.8217	107.09	1.30882	0.496093	-
CLIC5	A0A8I3NQ32	Chloride intracellular channel protein	50	9	14	7	9	90.5	55.4543	61.0219	64.0053	58.0054	155.009	68.9921	92.3397	1.33841	0.542409	-
PIK3C3	A0A8I3MWD3	Phosphatidylinositol 3-kinase catalytic subunit type 3	16	14	16	14	14	145.8	168.101	160.796	154.788	134.358	154.745	158.232	147.964	0.935104	0.338525	-
MAP1S	A0A8I3PT08	Microtubule associated protein 1S	15	13	15	13	13	156.8	121.81	105.562	103.355	91.1715	154.745	128.057	116.424	0.909156	0.663098	-
PTK2	A0A8I3NHA3	non-specific protein-tyrosine kinase	8	7	8	6	7	109.3	144.402	90.2117	132.092	106.555	154.481	114.638	131.043	1.1431	0.48027	-
STAU1	A0A8I3PPY0	Staufen double-stranded RNA binding protein 1	18	9	9	8	9	135.9	150.564	105.184	154.462	159.762	154.349	130.549	156.191	1.19641	0.193292	-
CAMK1D	A0A8I3RQN8	Calcium/calmodulin dependent protein kinase ID	27	8	10	4	8	167.7	204.28	171.365	160.34	141.274	154.349	181.115	151.987	0.839176	0.112941	-
GTF2A2	A0A8I3P2N9	Transcription initiation factor IIA subunit 2	7	1	1	1	1	99.7	120.546	86.9404	81.1495	67.3202	154.349	102.395	100.94	0.985781	0.963318	-
LOC111090648	A0A8I3P328	S-phase kinase-associated protein 1	9	2	3	2	2	123.5	166.679	137.897	173.402	261.659	154.085	142.692	196.382	1.37627	0.241564	-
ALDH16A1	A0A8I3S4S5	Aldehyde dehydrogenase family 16 member A1	22	11	12	11	11	172.7	108.855	137.519	138.297	126.737	154.085	139.691	139.706	1.00011	0.999458	-
IFT52	A0A8I3NZ92	Intraflagellar transport 52	3	1	1	1	1	18.1	25.1203	18.9986	29.0636	19.4763	154.085	20.7396	67.5417	3.25665	0.393288	-
DTNBP1	A0A8I3S839	Dystrobrevin binding protein 1	7	2	2	2	2	38.5	48.9768	58.2539	60.2498	54.4771	153.953	48.5769	89.56	1.84368	0.330824	-
NIF3L1	A0A8I3QK70	NIF3-like protein 1	39	11	16	11	11	207.3	215.182	226.725	171.116	195.609	153.821	216.402	173.516	0.80182	0.0532754	-
PRPS1	A0A8I3P9J3	ribose-phosphate diphosphokinase	43	12	16	7	12	146.7	113.91	129.215	141.889	134.217	153.821	129.942	143.309	1.10287	0.306529	-
RBP1	A0A8I3Q2C2	Cytosolic fatty-acid binding proteins domain-containing protein	30	10	22	10	10	139.1	236.668	168.345	216.508	255.591	153.689	181.371	208.596	1.15011	0.547038	-
PRCP	A0A8I3NNG3	Prolylcarboxypeptidase	12	5	7	5	5	191.6	159.885	182.562	182.056	161.173	153.689	178.016	165.639	0.930475	0.385195	-
TOP1	A0A8I3SCI3	DNA topoisomerase I	15	10	11	10	10	75.9	73.3071	106.694	124.582	135.487	153.689	85.3004	137.919	1.61687	0.0201805	UP
APOH	P33703	Beta-2-glycoprotein 1	39	12	15	12	12	127.7	168.259	400.354	311.209	410.978	153.557	232.104	291.915	1.25769	0.62581	-
ZNF185	A0A8I3P8P5	Uncharacterized protein	45	25	31	25	25	426.8	164.625	181.053	188.587	293.555	153.425	257.493	211.856	0.822765	0.663448	-
PTMS	A0A8I3Q2X8	Parathymosin	23	3	6	3	3	172.3	134.133	163.438	89.64	140.144	153.425	156.624	127.737	0.815564	0.284658	-
PAFAH1B3	A0A8I3MH35	Uncharacterized protein	27	6	7	6	6	113.4	138.557	110.091	120.663	100.204	153.425	120.683	124.764	1.03382	0.833558	-
SRC	A0A8I3Q3C2	Tyrosine-protein kinase	17	8	9	5	8	146.5	159.411	146.83	184.832	139.298	153.294	150.914	159.141	1.05452	0.610365	-
DDAH1	A0A8I3MHL9	dimethylargininase	4	1	1	1	1	144.5	172.209	130.725	97.9672	78.0462	153.294	149.145	109.769	0.73599	0.219305	-
PSMD14	A0A8I3QV78	Proteasome 26S subunit, non-ATPase 14	51	17	29	17	17	246.2	208.072	246.101	211.772	191.517	153.162	233.458	185.484	0.794507	0.0938946	-
UROD	A0A8I3PMG0	Uroporphyrinogen decarboxylase	28	8	13	8	8	119.8	68.2515	115.375	101.396	94.4176	153.162	101.142	116.325	1.15011	0.574007	-
BCL2L15	A0A8I3PHZ6	BCL2 like 15	54	7	8	7	7	192.3	108.065	127.706	131.603	155.387	153.03	142.69	146.673	1.02791	0.892642	-
PTPN6	A0A8I3PWC6	Tyrosine-protein phosphatase non-receptor type	34	16	19	15	16	132.2	113.594	77.6299	114.458	147.624	153.03	107.808	138.371	1.28349	0.20738	-
SMC1A	A0A8I3Q022	Structural maintenance of chromosomes protein	21	25	25	25	25	192.7	170.629	154.631	138.134	121.938	153.03	172.653	137.701	0.797556	0.0725455	-
RPL18	D0VWQ3	Large ribosomal subunit protein eL18	35	7	9	7	7	292.7	264.317	250.504	107.764	113.47	152.898	269.174	124.711	0.46331	0.00167361	Down
ACAD8	A0A8I3MWX4	Acyl-CoA dehydrogenase family member 8	41	15	16	15	15	133.7	73.6231	139.532	107.601	86.5142	152.898	115.619	115.671	1.00045	0.998636	-
DYNLRB2	A0A8I3PEX5	Dynein light chain roadblock	29	2	2	2	2	35.5	43.4471	45.7979	61.8826	52.6424	152.898	41.5817	89.1409	2.14376	0.274871	-
TJP1	A0A8I3MFF2	Tight junction protein 1	15	20	23	20	20	189.6	174.104	190.237	159.523	186.859	152.766	184.647	166.383	0.901085	0.217026	-
PRPSAP2	A0A8I3P0G4	Uncharacterized protein	47	13	16	12	13	196.1	181.53	194.263	185.811	130.124	152.766	190.631	156.234	0.81956	0.159452	-
MVK	A0A8I3PG05	Mevalonate kinase	39	13	17	13	13	252.6	357.846	260.696	321.496	336.46	152.634	290.381	270.196	0.930491	0.784748	-
SCPEP1	A0A8I3NVI7	Carboxypeptidase	23	8	17	8	8	182.7	174.578	193.76	125.398	118.692	152.634	183.68	132.241	0.719957	0.0212839	-
ARFGEF3	A0A8I3RTL8	ARFGEF family member 3	11	20	20	20	20	91.1	103.957	78.8881	63.842	64.9209	152.634	91.3151	93.7989	1.0272	0.941403	-
LOC119874304	A0A8I3N4T8	Uncharacterized protein	11	6	21	1	6	549.9	38.2335	100.529	39.0236	80.1632	152.502	229.554	90.5629	0.394517	0.481191	-
DNAAF3	A0A8I3MEI9	Dynein axonemal assembly factor 3	7	3	3	3	3	49.3	31.4399	49.9499	39.5134	39.7993	152.238	43.5633	77.1836	1.77176	0.465759	-
OCRL	A0A8I3S7X1	phosphoinositide 5-phosphatase	14	12	13	12	12	135.9	206.808	154.757	189.73	157.363	152.106	165.822	166.4	1.00349	0.982425	-
CYRIB	A0A8I3NN08	CYFIP related Rac1 interactor B	52	14	20	13	14	185.5	228.295	155.763	182.709	167.101	151.842	189.853	167.217	0.880774	0.402477	-
CD44	A0A8I3PJP5	CD44 antigen	9	5	9	5	5	194.4	178.686	199.799	172.586	145.931	151.842	190.962	156.786	0.821035	0.0316902	-
UBE2Z	A0A8I3NR62	Ubiquitin conjugating enzyme E2 Z	31	11	11	11	11	165	153.724	172.749	111.846	116.858	151.842	163.824	126.849	0.774298	0.081874	-
DNAH9	A0A8I3RR76	Dynein axonemal heavy chain 9	3	10	10	9	10	33.7	47.8708	45.2946	52.9023	48.5495	151.842	42.2885	84.4314	1.99656	0.337511	-
PDCD4	A0A8I3Q261	Programmed cell death protein 4	46	17	21	17	17	206.6	206.492	95.7477	148.257	78.1873	151.71	169.613	126.052	0.74317	0.386954	-
RABL2B	A0A8I3PPE7	Uncharacterized protein	21	4	4	4	4	65.6	65.4077	70.2066	54.2085	67.6024	151.71	67.0714	91.1738	1.35935	0.512492	-
FBLN5	A0A8I3PA99	Fibulin 5	8	4	4	4	4	126	159.253	257.55	152.339	211.134	151.579	180.935	171.684	0.948873	0.847697	-
FGF7	A0A8I3PIR4	Fibroblast growth factor 7	49	16	29	3	16	282.4	171.103	202.693	162.462	161.314	151.579	218.732	158.452	0.72441	0.209226	-
ACTL6A	A0A8I3RZ83	Actin like 6A	38	14	16	14	14	98.9	154.356	110.091	122.296	122.785	151.579	121.116	132.22	1.09168	0.606849	-
GNAQ	Q28294	Guanine nucleotide-binding protein G(q) subunit alpha	29	8	10	5	8	223	174.894	191.621	240.346	226.8	151.447	196.505	206.198	1.04932	0.775463	-
RPL19	A0A8I3NQB4	Ribosomal protein L19	30	6	11	6	6	257.1	142.981	198.793	64.9849	62.3805	151.447	199.624	92.9374	0.465561	0.0735675	-
MAPK14	O02812	Mitogen-activated protein kinase 14	51	13	23	13	13	193.3	235.088	185.33	241.653	162.443	151.315	204.573	185.137	0.904992	0.589335	-
GRHPR	A0A8I3NSV0	Glyoxylate and hydroxypyruvate reductase	52	14	18	14	14	180.7	171.577	198.793	172.096	162.302	151.315	183.69	161.904	0.8814	0.100202	-
YARS2	A0A8I3NPB7	Tyrosine--tRNA ligase	23	9	9	9	9	130.3	68.8834	100.277	97.6407	116.152	151.183	99.8202	121.658	1.21878	0.409361	-
BPIFB3	A0A8I3PMR5	BPI fold containing family B member 3	10	8	11	8	8	94.3	140.927	500.883	97.804	594.45	151.051	245.37	281.101	1.14562	0.869278	-
PROM1	A0A8I3RR75	Prominin 1	17	11	11	11	11	59.1	80.1007	147.962	67.1076	102.321	151.051	95.721	106.826	1.11602	0.774526	-
NAA50	A0A8I3QMS3	N-alpha-acetyltransferase 50, NatE catalytic subunit	50	8	8	8	8	139.4	166.205	94.9928	139.603	124.761	150.919	133.533	138.428	1.03666	0.84141	-
SEC16A	A0A8I3RUA0	Protein transport protein sec16	9	17	17	17	17	252.9	126.392	138.148	110.05	89.6191	150.919	172.48	116.863	0.677543	0.303927	-
ISCA1	A0A8I3MXR4	Iron-sulfur cluster assembly 1	28	3	4	3	3	99	58.6141	107.826	99.9266	88.6311	150.919	88.4801	113.159	1.27892	0.372277	-
POF1B	A0A8I3S4E7	POF1B actin binding protein	49	28	35	28	28	165.2	125.76	175.391	192.342	231.316	150.655	155.45	191.438	1.23151	0.275309	-
LOC119879793	A0A8I3MTE1	RRM domain-containing protein	12	3	3	2	3	160.6	112.331	93.1055	91.1095	92.3006	150.655	122.012	111.355	0.912656	0.723732	-
MCCC1	A0A8I3PL31	Methylcrotonyl-CoA carboxylase subunit 1	19	10	11	10	10	142.8	84.6824	159.034	98.7836	96.6757	150.523	128.839	115.327	0.895129	0.662903	-
GK2	A0A8I3NQD1	glycerol kinase	5	3	4	3	3	181	160.517	204.203	216.344	212.263	150.391	181.907	193	1.06098	0.682714	-
CHIA	A0A8I3MKS5	chitinase	18	6	7	6	6	57.9	286.909	205.713	89.1502	101.615	150.391	183.507	113.719	0.619697	0.409221	-
VPS25	A0A8I3NID4	Vacuolar protein-sorting-associated protein 25	47	10	12	10	10	183.5	212.654	154.379	202.955	166.677	150.259	183.511	173.297	0.944343	0.679067	-
TRA2A	A0A8I3N2R9	Transformer 2 alpha homolog	5	1	1	1	1	57	50.2407	79.8946	75.1082	52.6424	150.259	62.3784	92.67	1.48561	0.415619	-
ODAD4	A0A8I3RYA9	Outer dynein arm-docking complex subunit 4	6	4	4	4	4	16.2	16.2729	18.8727	24.8184	19.0529	149.995	17.1152	64.6222	3.77572	0.381862	-
RAB6A	A0A8I3N6R6	RAB6A, member RAS oncogene family	44	9	11	4	9	213.5	142.507	156.015	182.872	179.662	149.864	170.674	170.799	1.00073	0.9962	-
PTMA	A0A8I3PVL2	Prothymosin alpha	7	6	19	6	6	267.4	124.812	105.813	84.7417	103.027	149.864	166.008	112.544	0.677942	0.410204	-
ARL6IP1	A0A8I3MSF7	ADP ribosylation factor like GTPase 6 interacting protein 1	7	2	3	2	2	247.5	178.37	164.696	143.032	102.744	149.864	196.855	131.88	0.669933	0.109982	-
PPFIA2	A0A8I3NRP7	PTPRF interacting protein alpha 2	4	6	6	6	6	119.5	190.061	136.01	123.602	108.672	149.732	148.524	127.335	0.857339	0.447173	-
SH3YL1	A0A8I3NXS7	SH3 domain-containing YSC84-like protein 1	11	4	4	4	4	121.2	97.1636	109.462	111.846	148.048	149.6	109.275	136.498	1.24912	0.145696	-
ATE1	A0A8I3PH57	Arginyl-tRNA--protein transferase 1	20	9	11	1	9	202.5	227.189	117.137	156.094	139.298	149.6	182.275	148.331	0.813773	0.416066	-
SUPT16H	A0A8I3PYF0	FACT complex subunit	9	10	10	10	10	98.6	166.995	151.989	147.931	137.181	149.6	139.194	144.904	1.04102	0.810735	-
LOC482194	A0A8I3RT32	Albumin domain-containing protein	1	1	1	1	1	17.3	28.4381	21.2633	41.6361	24.1336	149.6	22.3338	71.7898	3.2144	0.3344	-
BBS7	A0A8I3PFN2	Bardet-Biedl syndrome 7 protein homolog	9	5	5	5	5	40.7	52.7685	37.8713	43.5954	48.9729	149.468	43.7799	80.6787	1.84282	0.396124	-
UBE2M	A0A8I3MA68	Ubiquitin conjugating enzyme E2 M	27	6	8	6	6	154.7	108.697	135.506	124.418	153.552	149.336	132.968	142.435	1.0712	0.593	-
PCBP2	A0A8I3P5D6	K Homology domain-containing protein	51	14	31	3	14	219	121.652	100.529	118.214	141.274	149.204	147.06	136.23	0.926358	0.797894	-
PTPN12	A0A8I3PFU2	Tyrosine-protein phosphatase non-receptor type 12	11	7	7	7	7	132.4	173.473	155.889	244.265	212.687	149.072	153.92	202.008	1.31242	0.2219	-
ZMAT2	A0A8I3MG22	Uncharacterized protein	11	2	2	2	2	74.6	155.778	118.898	173.565	158.774	149.072	116.425	160.47	1.37831	0.19445	-
COG8	A0A8I3NBG9	Conserved oligomeric Golgi complex subunit 8	20	13	13	13	13	188.6	204.28	177.278	153.972	138.31	149.072	190.053	147.118	0.774089	0.0150545	-
PPP1R37	A0A8I3RUE0	Protein phosphatase 1 regulatory subunit 37	5	3	3	3	3	144.4	120.546	132.109	109.56	113.329	149.072	132.352	123.987	0.9368	0.599684	-
MAPKAPK3	A0A8I3P736	non-specific serine/threonine protein kinase	32	9	9	9	9	169.8	213.602	243.458	212.589	205.771	148.412	208.953	188.924	0.904145	0.534828	-
CAP2	A0A8I3PTG3	Adenylyl cyclase-associated protein	3	2	7	2	2	159	265.422	188.476	232.999	252.204	148.149	204.299	211.117	1.03337	0.887009	-
CARMIL1	A0A8I3PU49	Capping protein regulator and myosin 1 linker 1	11	14	14	14	14	108.9	100.955	95.8735	88.6603	115.587	148.149	101.91	117.465	1.15264	0.463075	-
HSD17B8	Q5TJF5	(3R)-3-hydroxyacyl-CoA dehydrogenase	32	6	8	6	6	111.9	48.0288	78.0073	62.2092	59.5579	148.017	79.3121	89.9279	1.13385	0.775758	-
LOC111097149	A0A8I3MGT3	Serpin domain-containing protein	6	2	4	1	2	80.4	18.9587	26.9251	47.8407	47.1382	147.753	42.0946	80.9106	1.92211	0.384375	-
CTNNBL1	A0A8I3PZ00	Catenin beta like 1	18	9	12	9	9	162.3	147.72	126.951	157.891	107.684	147.621	145.657	137.732	0.94559	0.692373	-
MYG1	A0A8I3P0P9	MYG1 exonuclease	34	12	17	12	12	145.6	173.315	177.907	166.054	147.766	147.489	165.607	153.77	0.92852	0.38398	-
POLR2A	A0A8I3PKJ4	DNA-directed RNA polymerase subunit	11	18	18	18	18	151.7	118.018	145.698	136.991	118.975	147.489	138.472	134.485	0.971206	0.779953	-
C4BPB	A0A8I3MGP5	Complement component 4 binding protein beta	13	4	6	4	4	63	66.9876	69.7033	84.7417	82.4213	147.357	66.5636	104.84	1.57503	0.212904	-
ZFPL1	A0A8I3PUT7	Zinc finger protein-like 1	11	3	3	3	3	254.2	101.271	117.137	126.214	103.168	147.225	157.536	125.536	0.79687	0.582009	-
LRRFIP2	A0A8I3PZN3	LRR binding FLII interacting protein 2	23	10	14	9	10	118.7	145.034	149.095	165.565	223.554	146.829	137.61	178.649	1.29823	0.210366	-
PGM5	A0A8I3MPS0	Phosphoglucomutase 5	45	20	20	20	20	320.7	308.238	292.276	186.791	172.182	146.829	307.071	168.601	0.54906	0.00105482	Down
ALDH18A1	A0A8I3PPU5	Delta-1-pyrroline-5-carboxylate synthase	26	18	20	18	18	140.9	107.749	178.914	128.011	141.274	146.829	142.521	138.704	0.973222	0.872432	-
XRN2	A0A8I3PU99	5'-3' exoribonuclease	19	14	16	14	14	153.8	129.867	132.738	104.335	94.6998	146.829	138.802	115.288	0.830594	0.280546	-
TFF1	A0A8I3QY48	Trefoil factor 1	30	3	5	3	3	97.7	167.627	199.799	93.722	146.778	146.697	155.042	129.066	0.832456	0.50756	-
GM2A	A0A8I3MZE8	Ganglioside GM2 activator	26	6	7	6	6	126.3	158.306	194.893	246.714	292.567	146.434	159.833	228.572	1.43007	0.249423	-
LANCL1	A0A8I3P5K2	LanC like 1	32	10	13	10	10	215.2	176	154.882	198.873	165.266	146.434	182.028	170.191	0.934974	0.640054	-
CTNNB1	A0A8I3NUM7	Catenin beta 1	31	20	32	16	20	142.4	146.14	128.209	179.28	132.1	146.434	138.916	152.605	1.09853	0.437943	-
RPL29	A0A8I3QD64	60S ribosomal protein L29	16	4	4	4	4	129.6	117.386	147.459	78.8636	73.8122	146.434	131.482	99.7031	0.758304	0.307189	-
TRAF3IP1	A0A8I3Q3H4	TRAF3 interacting protein 1	2	2	2	2	2	74.2	88.4741	78.0073	76.2512	59.4167	146.434	80.2272	94.0338	1.17209	0.657612	-
TTC39A	A0A8I3PK13	Tetratricopeptide repeat domain 39A	17	8	8	8	8	157	147.088	177.404	169.647	132.947	146.302	160.497	149.632	0.9323	0.480944	-
TNKS1BP1	A0A8I3S5F5	Tankyrase 1 binding protein 1	23	27	28	27	27	488.7	121.178	171.868	181.076	165.831	146.17	260.582	164.359	0.630738	0.491073	-
VPS28	A0A8I3NBZ0	Vacuolar protein sorting-associated protein 28 homolog	59	14	17	14	14	181.4	167.153	142.678	138.134	158.633	145.906	163.744	147.558	0.90115	0.294043	-
ACYP1	A0A8I3NLM0	Acylphosphatase	15	2	2	2	2	91.4	109.171	61.1477	81.4761	106.555	145.906	87.2395	111.312	1.27594	0.366242	-
PYCR3	A0A8I3RZ20	Pyrroline-5-carboxylate reductase	24	6	8	6	6	126.9	94.1618	159.286	72.1692	107.825	145.774	126.783	108.589	0.856501	0.556773	-
SNRPA	A0A8I3MNF1	U1 small nuclear ribonucleoprotein A	25	7	8	5	7	100.2	113.91	67.8161	111.356	91.8772	145.774	93.9755	116.336	1.23794	0.345181	-
CSK	A0A8I3P4Z0	Tyrosine-protein kinase	49	18	24	18	18	159.1	184.69	147.459	165.238	151.012	145.642	163.75	153.964	0.94024	0.488542	-
RPL13A	A0A8I3PLT0	Large ribosomal subunit protein uL13	31	8	14	8	8	186.7	189.271	178.285	105.315	110.366	145.642	184.752	120.441	0.651905	0.0301045	Down
AMDHD1	A0A8I3PQT9	Probable imidazolonepropionase	22	10	11	10	10	159.3	184.216	161.173	153.482	158.492	145.51	168.23	152.495	0.906467	0.178624	-
VDAC1	A0A8I3NLR0	Uncharacterized protein	65	14	24	14	14	406	159.411	287.369	316.108	248.816	145.378	284.26	236.767	0.832925	0.616646	-
TOMM34	A0A8I3NTN0	Translocase of outer mitochondrial membrane 34	17	5	5	5	5	73.8	81.3646	57.3731	116.744	113.047	145.246	70.8459	125.013	1.76457	0.0153526	UP
ARL2	A0A8I3SAX9	ADP-ribosylation factor-like protein 2	39	6	7	6	6	166.3	152.618	101.913	126.214	112.059	145.246	140.277	127.84	0.91134	0.609659	-
PCYT1A	A0A8I3Q529	choline-phosphate cytidylyltransferase	23	8	8	8	8	158.4	148.352	136.513	137.154	146.778	145.114	147.755	143.015	0.967922	0.54872	-
RALBP1	A0A8I3MNB3	RalA binding protein 1	14	9	9	9	9	92.2	66.3556	50.0757	83.1089	64.2152	144.982	69.5438	97.4355	1.40107	0.383287	-
PTGFRN	A0A8I3Q6X7	Prostaglandin F2 receptor inhibitor	14	12	12	12	12	138.5	127.182	117.766	171.769	115.587	144.851	127.816	144.069	1.12716	0.427953	-
CD109	A0A5F4D8V4	CD109 molecule	15	19	22	19	19	159.9	238.248	330.65	314.965	309.362	144.719	242.933	256.348	1.05522	0.866008	-
C15H1orf50	A0A8I3NY90	Chromosome 1 open reading frame 50	51	10	18	10	10	200.4	137.135	133.116	113.642	134.781	144.719	156.884	131.047	0.835316	0.362621	-
HPCAL1	A0A8I3PSJ2	Hippocalcin like 1	42	8	9	4	8	92.5	105.379	85.6823	113.642	97.0991	144.719	94.5204	118.487	1.25356	0.221947	-
HMGN1	A0A8I3Q3N4	Uncharacterized protein	56	7	10	7	7	159.3	60.51	82.6626	188.75	150.588	144.587	100.824	161.308	1.5999	0.169878	-
GRPEL1	A0A8I3N3U8	GrpE protein homolog	45	10	10	10	10	175	55.9283	158.531	107.437	110.507	144.587	129.82	120.844	0.930856	0.836544	-
LOC491788	A0A8I3S7V3	Small ubiquitin-related modifier	15	2	4	2	2	230.4	160.043	176.271	168.177	164.56	144.455	188.905	159.064	0.842032	0.294101	-
PEX5	A0A8I3PH40	Peroxisomal biogenesis factor 5	8	4	4	4	4	146.1	128.288	133.871	171.606	150.024	144.455	136.086	155.361	1.14164	0.133557	-
SUPT4H1	A0A8I3PJN9	SPT4 homolog, DSIF elongation factor subunit	6	1	1	1	1	102.7	62.0899	61.9026	70.5364	62.945	144.455	75.5642	92.6454	1.22605	0.600951	-
CLIC3	A0A8I3Q787	Chloride intracellular channel 3	53	11	21	10	11	238.5	285.961	242.074	277.411	412.53	144.323	255.512	278.088	1.08836	0.799996	-
LOC607889	A0A8I3MXS0	UBC core domain-containing protein	49	7	16	7	7	203.2	126.866	155.763	162.952	148.471	144.323	161.943	151.915	0.93808	0.700552	-
RPS17	A0A8I3MLZ4	Small ribosomal subunit protein eS17	69	11	17	7	11	127.6	203.965	226.725	67.7607	141.415	144.323	186.096	117.833	0.633181	0.157744	-
PAFAH1B2	A0A8I3MM45	Platelet activating factor acetylhydrolase 1b catalytic subunit 2	26	5	8	5	5	183.5	315.663	239.055	154.952	205.489	144.191	246.073	168.21	0.68358	0.168442	-
STEAP4	A0A8I3NIZ7	STEAP4 metalloreductase	21	8	9	8	8	98.2	73.1492	76.2459	86.8643	68.7315	144.191	82.5317	99.9289	1.21079	0.532046	-
CSNK2B	A0A8I3NIN1	Casein kinase II subunit beta	41	7	11	7	7	118.4	179.476	151.611	119.683	103.309	143.795	149.829	122.262	0.816013	0.273067	-
DRAP1	A0A8I3PA36	DR1 associated protein 1	4	1	1	1	1	75.6	59.0881	49.9499	65.8013	49.9609	143.795	61.546	86.5191	1.40576	0.483115	-
DENR	A0A8I3S4F4	Density-regulated protein	35	9	16	9	9	160.2	190.851	100.151	185.648	176.415	143.663	150.401	168.576	1.12084	0.583566	-
KIF1B	A0A8I3RPG2	Uncharacterized protein	13	17	18	12	17	131.3	150.248	174.762	165.075	139.439	143.531	152.103	149.348	0.981888	0.863711	-
PABPC4L	A0A8I3PLQ2	Poly(A) binding protein cytoplasmic 4 like	2	1	1	1	1	131.1	178.054	136.764	137.644	122.503	143.531	148.64	134.559	0.905273	0.451983	-
PEX19	A0A8I3Q4P4	Peroxisomal biogenesis factor 19	34	8	15	8	8	112.1	169.839	189.231	224.508	153.975	143.399	157.056	173.961	1.10763	0.649274	-
OPA1	A0A8I3PQW8	Dynamin-like 120 kDa protein, mitochondrial	20	18	20	18	18	125.5	116.122	148.214	140.91	114.6	143.136	129.945	132.882	1.02259	0.835118	-
OGN	A0A8I3PS70	Osteoglycin	5	2	2	2	2	63.4	54.6644	53.5986	46.5344	51.0899	143.136	57.221	80.2533	1.40251	0.540861	-
ZFYVE16	A0A8I3NCV3	Zinc finger FYVE domain-containing protein	10	11	11	11	11	154.1	152.776	125.441	134.542	114.882	143.004	144.106	130.809	0.90773	0.348641	-
CYP4A39	Q2VHZ7	Cytochrome P450 4A39	15	7	10	7	7	299.6	152.934	219.553	122.132	110.224	142.872	224.029	125.076	0.558304	0.13882	-
SRSF9	A0A8I3Q7G3	Serine and arginine rich splicing factor 9	33	8	9	8	8	189.9	80.8906	93.3572	64.1685	99.6395	142.872	121.383	102.227	0.842185	0.670267	-
MYO1F	A0A8I3RTK5	Myosin IF	5	5	6	5	5	109.6	166.205	102.668	168.993	204.36	142.608	126.158	171.987	1.36327	0.164932	-
CYP4A38	A0A8I3P4E2	Cytochrome P450 4A37	21	10	13	10	10	327.1	127.34	237.293	114.785	112.341	142.608	230.578	123.245	0.534504	0.201544	-
CPHL1	A0A8I3PK96	Ceruloplasmin	22	20	22	20	20	89.4	176.948	599.902	141.236	426.643	142.476	288.75	236.785	0.820035	0.794504	-
NPEPL1	A0A8I3NGL3	Aminopeptidase like 1	27	9	12	9	9	133.7	156.726	137.771	169.32	153.552	142.476	142.732	155.116	1.08676	0.305533	-
PMM2	A0A8I3NRW2	Phosphomannomutase	45	13	24	13	13	151	154.672	178.033	150.87	143.673	142.344	161.235	145.629	0.903209	0.199735	-
GSTZ1	A0A8I3MVI4	maleylacetoacetate isomerase	47	8	9	8	8	152.4	81.6806	137.394	86.701	82.2802	142.344	123.825	103.775	0.83808	0.526683	-
WASL	A0A8I3MR53	WASP like actin nucleation promoting factor	12	5	5	5	5	154.9	96.3736	68.0677	137.807	142.544	142.212	106.447	140.854	1.32323	0.310494	-
NFKB1	A0A8I3PWH3	Nuclear factor NF-kappa-B p105 subunit	26	20	22	20	20	229.7	245.99	196.654	230.713	191.093	142.08	224.115	187.962	0.838687	0.303163	-
TGFBRAP1	A0A8I3NCS7	Transforming growth factor beta receptor associated protein 1	9	7	7	7	7	89.4	104.589	121.037	111.03	100.345	141.948	105.009	117.774	1.12157	0.459341	-
ERLIN2	A0A8I3NND5	Erlin	37	13	15	9	13	251	145.666	158.657	291.616	242.889	141.816	185.108	225.44	1.21789	0.508311	-
ESYT1	A0A8I3N2N7	Extended synaptotagmin 1	6	7	7	7	7	139.5	74.5711	91.8474	125.071	89.9013	141.816	101.973	118.93	1.16629	0.532332	-
PDXK	A0A8I3NV46	Pyridoxal kinase	39	12	16	12	12	194.2	205.07	201.813	209.323	182.766	141.684	200.361	177.925	0.888021	0.372241	-
[truncated: 4,145 more rows]
