# Supplementary material for: Protein biomarker discovery for canine cognitive dysfunction syndrome based on molecular alterations observed in nasal fluids
Source: Research Square preprint supplement (doi:10.21203/rs.3.rs-7142040/v1), 2025-08-07

A. Full-length, uncropped dot blot image probed with anti-BUD31 antibody.

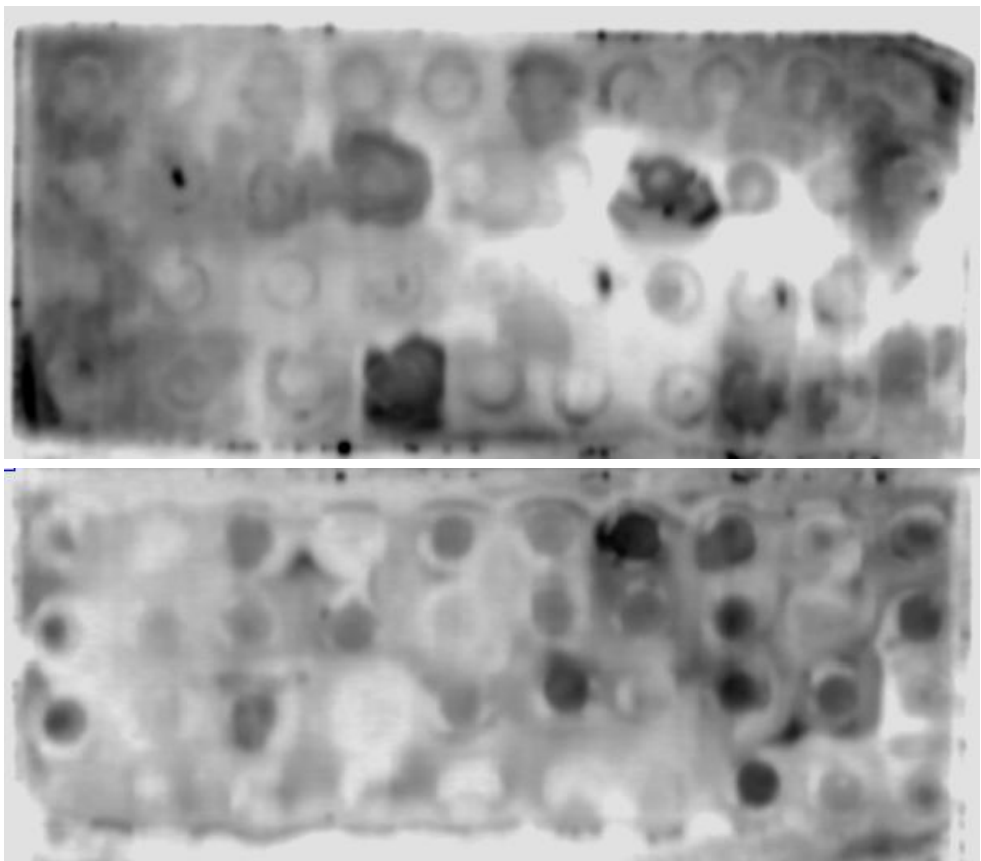

B. Full-length, uncropped dot blot image probed with anti-CTSG antibody.

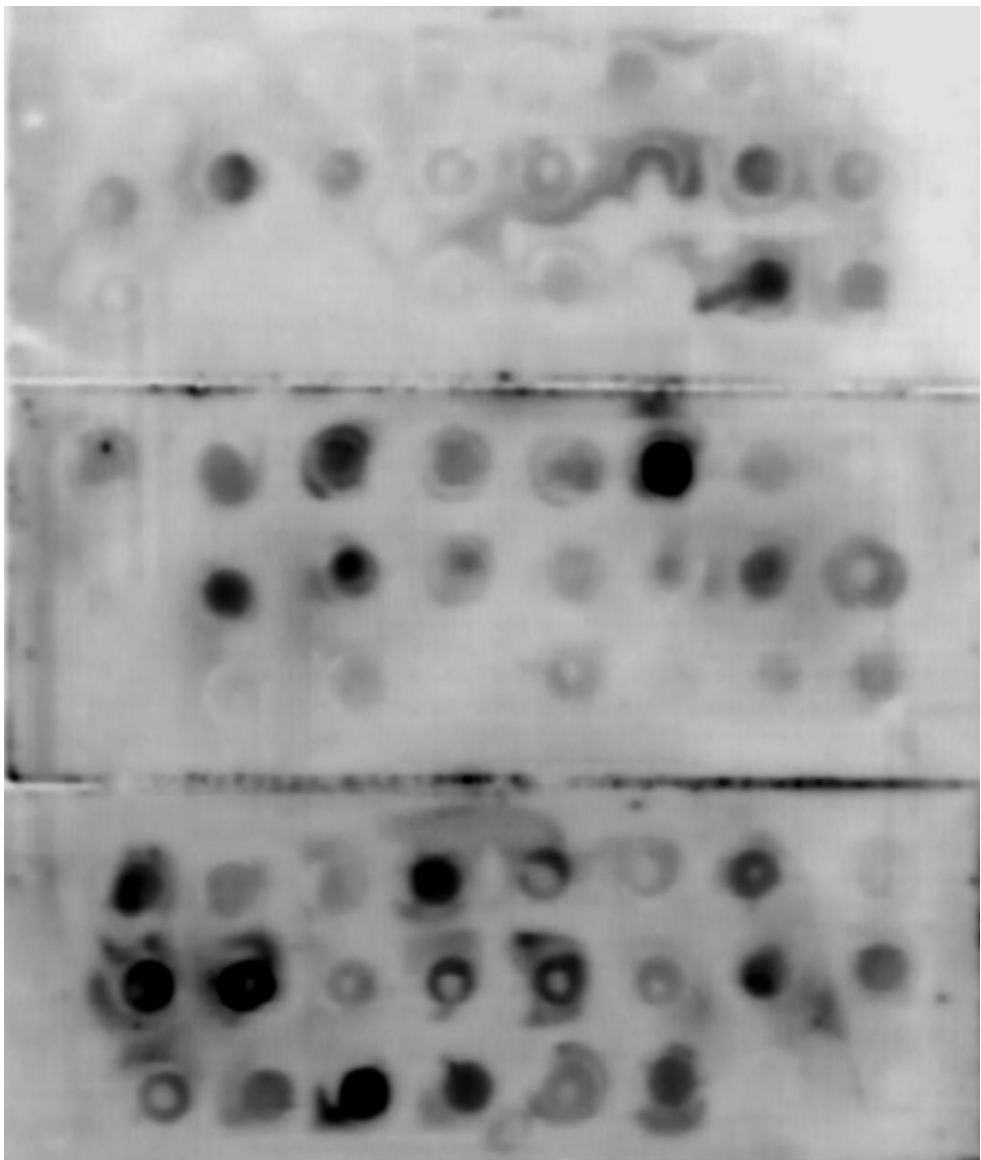

C. Full-length, uncropped dot blot image probed with anti-TRIM14 antibody.

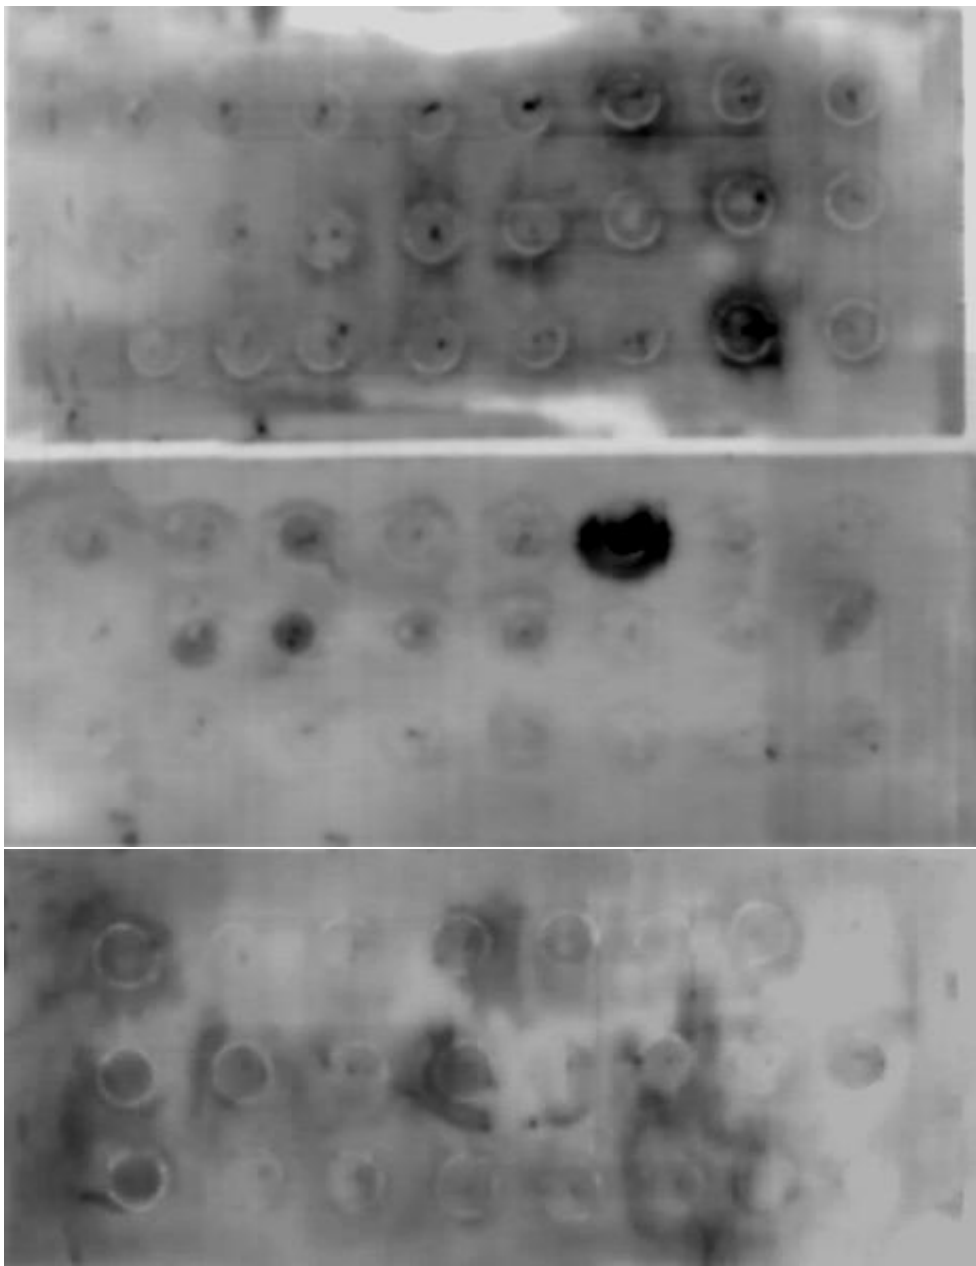

A. Full-length, uncropped dot blot image probed with anti-ALDH1A1 antibody.

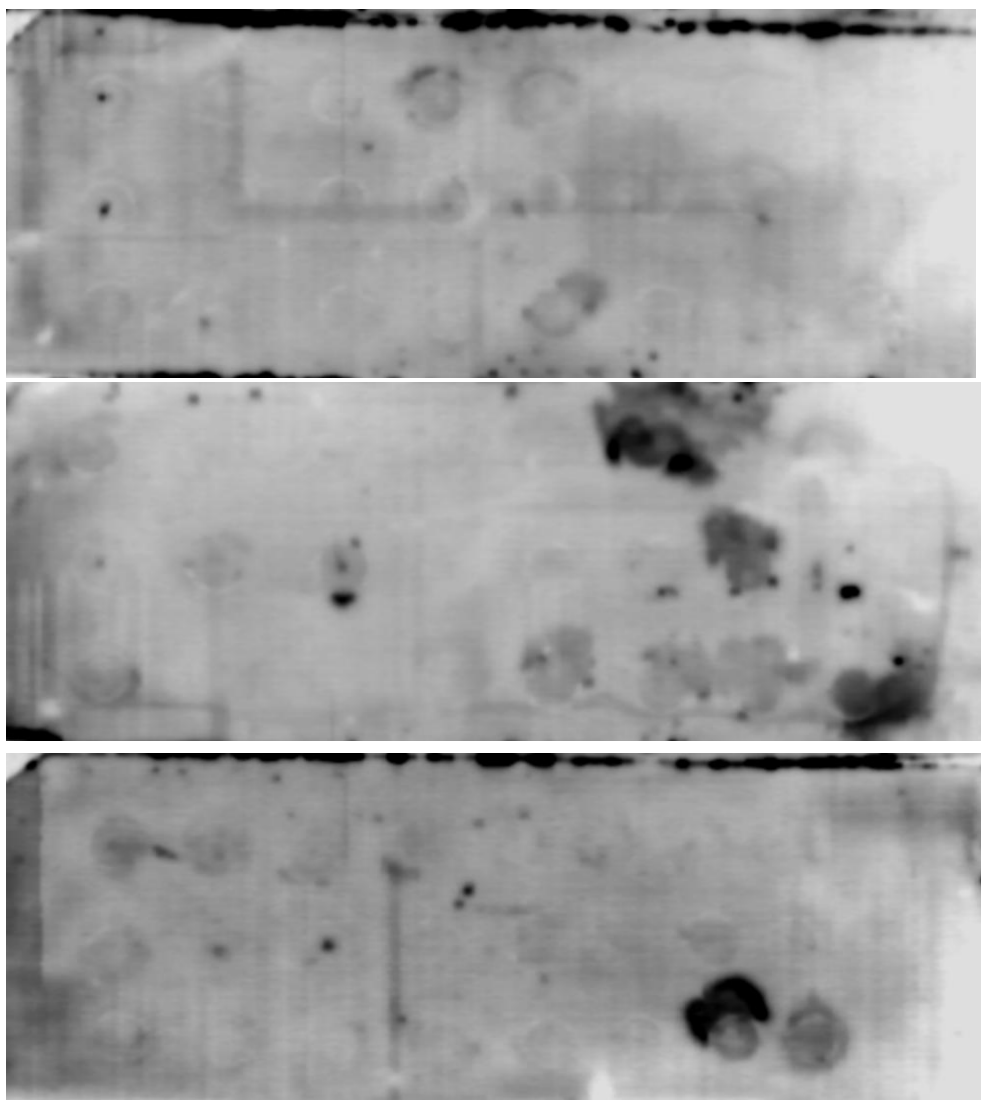

A. Full-length, uncropped dot blot image probed with anti-BCO2 antibody.

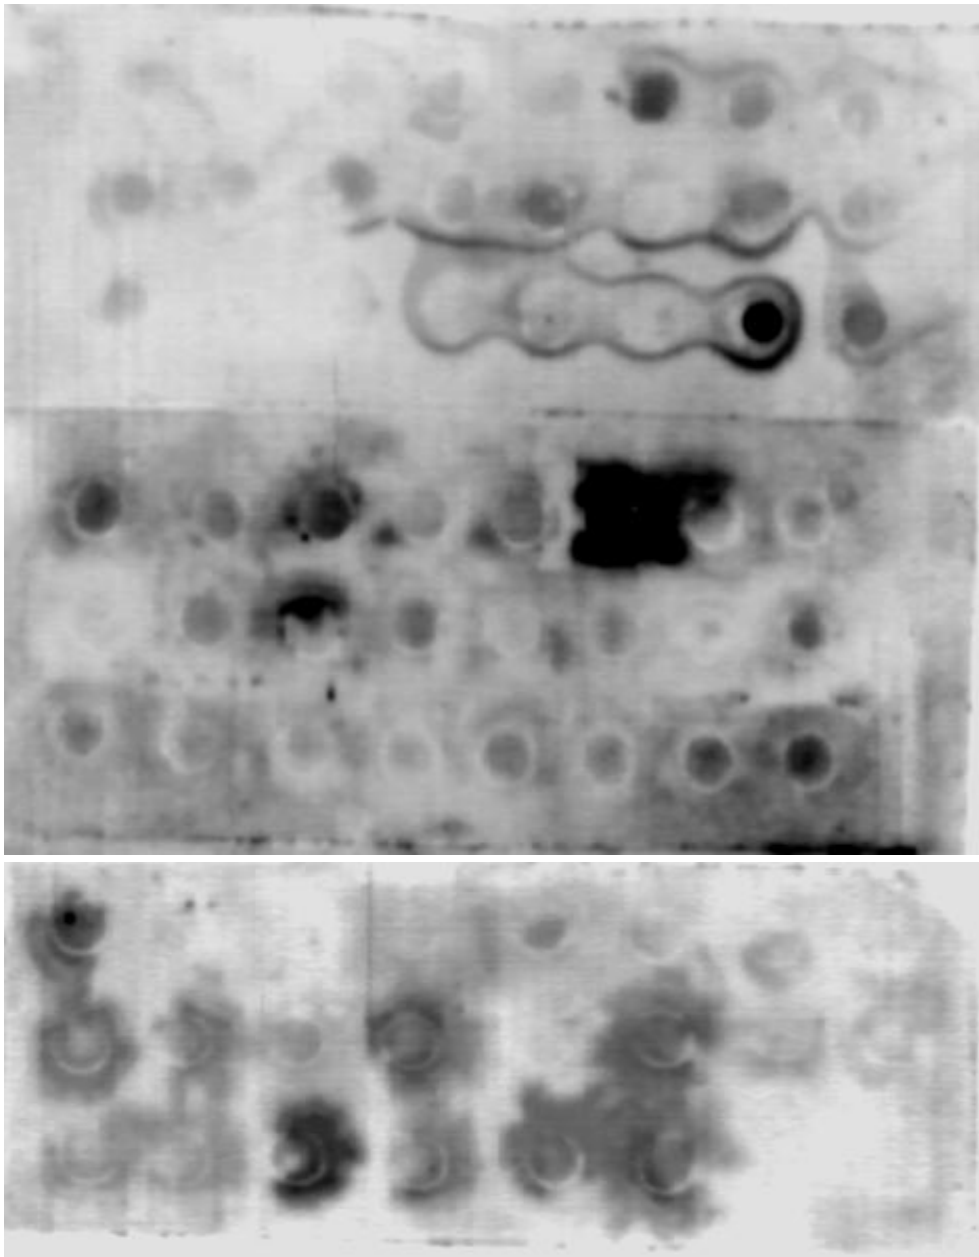

A. Full-length, uncropped dot blot image probed with anti-PSMB8 antibody.

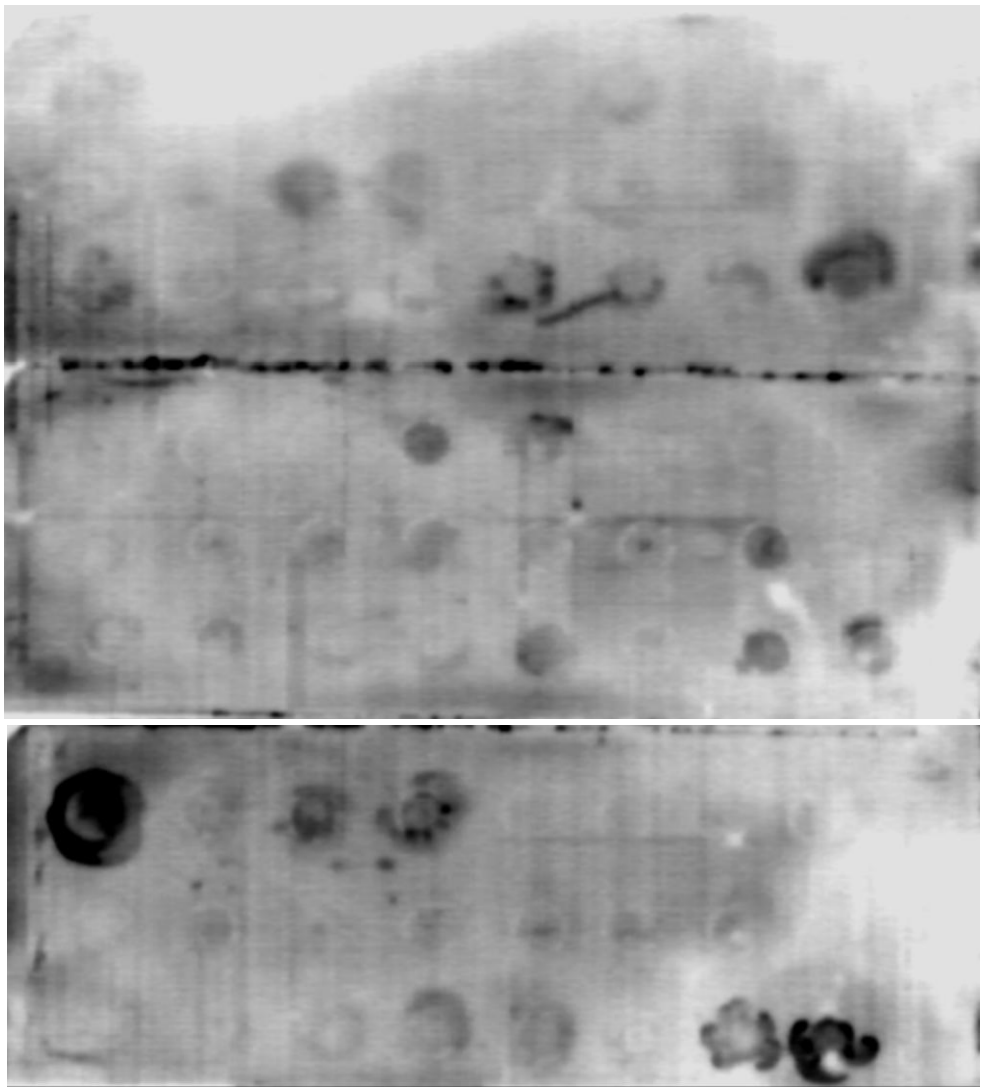

Supplement: Supplementary file 1 [file 93e1fee758e3823a1f54ef82.pdf]
